# Supplementary material for: Ago1 Interacts with RNA Polymerase II and Binds to the Promoters of Actively Transcribed Genes in Human Cancer Cells
Source: PLoS Genet. 2013 Sep 26;9(9):e1003821. doi: 10.1371/journal.pgen.1003821 (PMC3784563; doi:10.1371/journal.pgen.1003821)
Supplement: Table S7 — Genes downregulated by Ago1 knockdown (>1.2 fold, P<0.05). (XLSX) [file pgen.1003821.s019.xlsx]

## Sheet: Table S7
Supplemental Table 7. Genes downregulated by Ago1 knockdown (>1.2 fold, P<0.05)
Mock+siControl		siAgo1		Ratio	p-value	Gene Identifier	Gene Symbol	Gene Name
Mean	SEM	Mean	SEM
7.37666	0.076416	5.18478	0.51979	4.57	0.00292523	NM_012199	EIF2C1	Eukaryotic translation initiation factor 2C, 1
8.64211	0.084829	6.48111	0.05053	4.47	7.89633e-05	NM_033505	SELI	Selenoprotein I
9.31786	0.091381	7.15922	0.04504	4.46	0.00010272	NM_004124	GMFB	Glia maturation factor, beta
9.06802	0.06208	7.06945	0.068975	4	4.04046e-05	NM_001100626	ERLIN1	ER lipid raft associated 1
8.3815	0.06991	6.44312	0.01126	3.83	5.08402e-05	NM_206827	RASL11A	RAS-like, family 11, member A
7.34067	0.102657	5.561	0.021875	3.43	0.000324882	NM_032900	ARHGAP19	Rho GTPase activating protein 19
9.22356	0.039442	7.44571	0.0715	3.43	1.74262e-05	NM_032020	FUCA2	Fucosidase, alpha-L- 2, plasma
9.11462	0.086053	7.34642	0.04814	3.41	0.000181789	NM_012319	SLC39A6	Solute carrier family 39 (zinc transporter), member 6
8.32901	0.030326	6.65451	0.100175	3.19	2.56028e-05	NM_018369	DEPDC1B	DEP domain containing 1B
11.1537	0.01578	9.51381	0.06542	3.12	3.86835e-06	NM_001008709	PPP1CA	Protein phosphatase 1, catalytic subunit, alpha isoform
11.9949	0.025004	10.3656	0.06775	3.09	8.26431e-06	NM_015161	ARL6IP1	ADP-ribosylation factor-like 6 interacting protein 1
10.7794	0.068876	9.23614	0.03791	2.91	0.000128935	NM_175866	UHMK1	U2AF homology motif (UHM) kinase 1
10.7172	0.09278	9.25319	0.055075	2.76	0.000515855	NM_022731	NUCKS1	Nuclear casein kinase and cyclin-dependent kinase substrate 1
9.94253	0.074357	8.57108	0.070755	2.59	0.0003307	NM_001146276	-	arylacetamide deacetylase-like 1
11.1691	0.091399	9.81575	0.039805	2.55	0.000627574	NR_024058	-	tyrosine 3-monooxygenase/tryptophan 5-monooxygenase activation protein, epsilon polypeptide
7.41865	0.042062	6.08538	0.087245	2.52	8.648e-05	NM_015713	RRM2B	Ribonucleotide reductase M2 B (TP53 inducible)
8.40192	0.041966	7.06893	0.119285	2.52	0.000158733	NM_194279	ISCA2	Iron-sulfur cluster assembly 2 homolog (S. cerevisiae)
8.27522	0.160724	6.94885	0.196375	2.51	0.00791133	NM_032237	SGK196	Protein kinase-like protein SgK196
8.69144	0.034539	7.37166	0.0822	2.5	5.27867e-05	NM_004874	BAG4	BCL2-associated athanogene 4
6.52947	0.138788	5.21012	0.10416	2.5	0.00374465	NM_012326	MAPRE3	Microtubule-associated protein, RP/EB family, member 3
7.67062	0.090591	6.35738	0.02386	2.48	0.000655748	NM_012320	PLA2G15	Phospholipase A2, group XV
6.2001	0.116726	4.89325	0.204245	2.47	0.00371304	NM_001136049	LMLN	Leishmanolysin-like (metallopeptidase M8 family)
7.57504	0.289346	6.26851	0.097725	2.47	0.0406539	NM_144765	MPZL2	Myelin protein zero-like 2
7.40062	0.086982	6.13407	0.05844	2.41	0.000725141	NM_003597	KLF11	Kruppel-like factor 11
7.23885	0.090329	5.99174	0.050155	2.37	0.000852332	NM_022832	USP46	Ubiquitin specific peptidase 46
7.92081	0.024071	6.69709	0.079325	2.34	3.53278e-05	NM_003157	NEK4	NIMA (never in mitosis gene a)-related kinase 4
6.83913	0.073694	5.62133	0.02891	2.33	0.00040539	NM_004775	B4GALT6	UDP-Gal:betaGlcNAc beta 1,4- galactosyltransferase, polypeptide 6
8.20237	0.042687	7.05007	0.0175	2.22	5.91955e-05	NM_198965	PTHLH	Parathyroid hormone-like hormone
9.35486	0.065881	8.21693	0.112825	2.2	0.000702992	NM_012428	NPTN	Neuroplastin
4.88053	0.05279	3.74369	0.078945	2.2	0.000254718	NM_017681	NUP62CL	Nucleoporin 62kDa C-terminal like
6.35277	0.081517	5.21794	0.10098	2.2	0.00116017	NM_016516	VPS54	Vacuolar protein sorting 54 homolog (S. cerevisiae)
7.85873	0.073467	6.72966	0.055055	2.19	0.000608344	NM_004898	CLOCK	Clock homolog (mouse)
7.76164	0.050682	6.64075	0.07985	2.17	0.000243104	NM_020870	SH3RF1	SH3 domain containing ring finger 1
6.87329	0.143355	5.75265	0.047075	2.17	0.00667363	NM_031427	DNAL1	Dynein, axonemal, light chain 1
6.71746	0.134133	5.60043	0.15538	2.17	0.00739113	NM_203376	TMEM81	Transmembrane protein 81
10.4956	0.042637	9.38333	0.07453	2.16	0.000144529	NM_014248	RBX1	Ring-box 1
6.5989	0.042002	5.50845	0.02704	2.13	7.46346e-05	NM_020871	LRCH2	Leucine-rich repeats and calponin homology (CH) domain containing 2
8.99058	0.062059	7.91049	0.04814	2.11	0.000379848	NM_002296	LBR	Lamin B receptor
6.87562	0.168703	5.79579	0.2648	2.11	0.022904	AK131472	ZNF730	Zinc finger protein 730
9.41667	0.119648	8.34345	0.01866	2.1	0.00395985	NM_001878	CRABP2	Cellular retinoic acid binding protein 2
6.70252	0.139309	5.64581	0.29959	2.08	0.0191011	NM_021622	PLEKHA1	Pleckstrin homology domain containing, family A (phosphoinositide binding specific) member 1
7.62932	0.077301	6.58542	0.029165	2.06	0.000881615	NM_001098785	FAM89B	Family with sequence similarity 89, member B
7.72183	0.052374	6.67989	0.07478	2.06	0.000331083	NR_026728	-	ER degradation enhancer, mannosidase alpha-like 2
7.29569	0.091665	6.26741	0.014435	2.04	0.00172264	NM_145698	ACBD5	Acyl-Coenzyme A binding domain containing 5
7.86506	0.070343	6.84188	0.05291	2.03	0.000753175	NM_022098	XPNPEP3	X-prolyl aminopeptidase (aminopeptidase P) 3, putative
7.45127	0.094564	6.42957	0.040815	2.03	0.00208563	NR_024152	-	microfibrillar-associated protein 3
8.26587	0.066871	7.25383	0.046615	2.02	0.000631239	NM_152617	RNF168	Ring finger protein 168
7.49014	0.033779	6.4831	0.07967	2.01	0.000138276	NM_003766	BECN1	Beclin 1, autophagy related
8.94214	0.128581	7.93666	0.002405	2.01	0.00645833	NM_182620	FAM33A	Family with sequence similarity 33, member A
10.8568	0.02834	9.85549	0.0162	2	2.13972e-05	NM_031266	HNRNPAB	Heterogeneous nuclear ribonucleoprotein A/B
7.00196	0.055227	6.00818	0.01717	1.99	0.00028554	NM_017549	EPDR1	Ependymin related protein 1 (zebrafish)
8.64293	0.061175	7.65085	0.0455	1.99	0.000492769	AB096683	FAM72D	Family with sequence similarity 72, member D
8.50621	0.041508	7.51417	0.095385	1.99	0.000313454	AB096683	FAM72D	Family with sequence similarity 72, member D
8.63878	0.058848	7.64912	0.037435	1.99	0.00040926	AB096683	FAM72D	Family with sequence similarity 72, member D
8.40792	0.071738	7.41878	0.026465	1.98	0.000812325	NM_024745	SHCBP1	SHC SH2-domain binding protein 1
9.07676	0.063166	8.08814	0.06577	1.98	0.000657421	NM_014500	HTATSF1	HIV-1 Tat specific factor 1
8.74898	0.04855	7.76098	0.04965	1.98	0.000234186	NM_003916	AP1S2	Adaptor-related protein complex 1, sigma 2 subunit
6.77801	0.032497	5.79038	0.003875	1.98	3.52006e-05	NM_003060	SLC22A5	Solute carrier family 22 (organic cation/carnitine transporter), member 5
7.19468	0.053003	6.21016	0.07072	1.98	0.000405893	NM_001071	TYMS	Thymidylate synthetase
8.55677	0.060321	7.57376	0.044315	1.98	0.000481629	AB096683	FAM72D	Family with sequence similarity 72, member D
6.18121	0.116032	5.20491	0.163705	1.97	0.00827462	NM_176787	PIGN	Phosphatidylinositol glycan anchor biosynthesis, class N
7.50171	0.026486	6.52719	0.09204	1.96	0.00014553	NM_001001342	BLOC1S2	Biogenesis of lysosomal organelles complex-1, subunit 2
7.03019	0.055566	6.0562	0.10652	1.96	0.000774639	NM_003513	HIST1H2AB	Histone cluster 1, H2ab
9.33795	0.04257	8.36407	0.001125	1.96	0.000107803	NR_026753	-	MARVEL domain containing 1
9.01463	0.034147	8.04715	0.0085	1.96	4.72229e-05	NM_022735	ACBD3	Acyl-Coenzyme A binding domain containing 3
7.75792	0.051534	6.79214	0.0891	1.95	0.000519082	NM_024923	NUP210	Nucleoporin 210kDa
10.3044	0.01008	9.34144	0.018155	1.95	8.63229e-07	NM_001018111	PODXL	Podocalyxin-like
7.06297	0.065725	6.10311	0.073855	1.95	0.000900363	NM_003828	MTMR1	Myotubularin related protein 1
6.37137	0.116014	5.42896	0.098545	1.92	0.00690246	NM_000857	GUCY1B3	Guanylate cyclase 1, soluble, beta 3
3.38931	0.18558	2.45023	0.23543	1.92	0.0401164	ENST00000410422	-	ncrna:rRNA chromosome:NCBI36:12:106189210:106189316:-1 gene:ENSG00000222354
10.8173	0.079819	9.87996	0.04302	1.92	0.00157186	NM_182620	FAM33A	Family with sequence similarity 33, member A
8.54843	0.049574	7.61243	0.007295	1.91	0.00023091	NM_000430	PAFAH1B1	Platelet-activating factor acetylhydrolase, isoform Ib, subunit 1 (45kDa)
9.04072	0.075678	8.10501	0.063915	1.91	0.0014627	NM_201524	GPR56	G protein-coupled receptor 56
7.93159	0.064746	7.00457	0.066785	1.9	0.000921045	NM_001012968	SPIN4	Spindlin family, member 4
9.04657	0.025499	8.12001	0.08352	1.9	0.000131244	NM_018270	C20orf20	Chromosome 20 open reading frame 20
7.99474	0.038248	7.07203	0.04862	1.9	0.000139887	NM_018638	ETNK1	Ethanolamine kinase 1
10.5582	0.052823	9.6395	0.058305	1.89	0.000453042	NM_003521	HIST1H2BM	Histone cluster 1, H2bm
9.18234	0.042934	8.26991	0.020425	1.88	0.000154978	NM_000946	PRIM1	Primase, DNA, polypeptide 1 (49kDa)
7.23336	0.055835	6.32175	0.08685	1.88	0.00077918	NM_019005	MIOS	Missing oocyte, meiosis regulator, homolog (Drosophila)
6.93175	0.060708	6.02822	0.002035	1.87	0.000579447	BC032035	FAM27E3	Family with sequence similarity 27, member E3
6.80676	0.057074	5.90341	0.065175	1.87	0.000667803	NM_014881	DCLRE1A	DNA cross-link repair 1A (PSO2 homolog, S. cerevisiae)
7.59504	0.175377	6.6921	0.16985	1.87	0.0331551	NM_145290	GPR125	G protein-coupled receptor 125
8.34105	0.074411	7.4383	0.00033	1.87	0.00126994	NM_018319	TDP1	Tyrosyl-DNA phosphodiesterase 1
6.70922	0.06612	5.81158	0.006425	1.86	0.00082834	BC032035	FAM27E3	Family with sequence similarity 27, member E3
6.3688	0.094512	5.47468	0.108015	1.86	0.00463601	NM_016132	MYEF2	Myelin expression factor 2
5.14882	0.188668	4.25573	0.219285	1.86	0.0463452	ENST00000365142	-	ncrna:misc_RNA chromosome:NCBI36:2:88310203:88310298:-1 gene:ENSG00000202012
8.20913	0.040428	7.31617	0.02671	1.86	0.000142148	NM_001083112	GPD2	Glycerol-3-phosphate dehydrogenase 2 (mitochondrial)
6.80884	0.061174	5.92159	0.02346	1.85	0.000670744	BC032035	FAM27E3	Family with sequence similarity 27, member E3
8.51033	0.021706	7.62556	0.199255	1.85	0.00218517	NM_014997	KLHDC10	Kelch domain containing 10
12.1116	0.05893	11.2283	0.1222	1.84	0.00158726	NR_024058	-	tyrosine 3-monooxygenase/tryptophan 5-monooxygenase activation protein, epsilon polypeptide
7.02922	0.181961	6.14975	0.203535	1.84	0.0427684	NM_001080480	MBOAT1	Membrane bound O-acyltransferase domain containing 1
7.75599	0.059082	6.87848	0.16215	1.84	0.00274114	NM_207446	FAM174B	Family with sequence similarity 174, member B
7.82809	0.075408	6.95451	0.031065	1.83	0.00159536	NM_004275	MED20	Mediator complex subunit 20
9.42287	0.107923	8.55693	0.15765	1.82	0.0100747	NM_014283	C1orf9	Chromosome 1 open reading frame 9
6.57958	0.070591	5.72114	0.108895	1.81	0.00236427	NM_018287	ARHGAP12	Rho GTPase activating protein 12
6.64381	0.028601	5.78712	0.086325	1.81	0.000229558	NM_000782	CYP24A1	Cytochrome P450, family 24, subfamily A, polypeptide 1
8.07586	0.046745	7.22096	0.03742	1.81	0.000316735	NM_001011713	NAT12	N-acetyltransferase 12 (GCN5-related, putative)
6.47433	0.079992	5.61999	0.15979	1.81	0.00526593	NM_058238	WNT7B	Wingless-type MMTV integration site family, member 7B
9.90193	0.040844	9.05205	0.094475	1.8	0.000543723	NM_016057	COPZ1	Coatomer protein complex, subunit zeta 1
8.65897	0.029121	7.81095	0.02432	1.8	5.1608e-05	NM_003071	HLTF	Helicase-like transcription factor
8.97348	0.069472	8.12583	0.008685	1.8	0.00124875	NM_012388	PLDN	Pallidin homolog (mouse)
7.57996	0.082134	6.7336	0.43671	1.8	0.045266	NR_000018	-	small nucleolar RNA, C/D box 35A
8.68489	0.042426	7.84346	0.05676	1.79	0.000315148	NM_004369	COL6A3	Collagen, type VI, alpha 3
7.82398	0.172333	6.98255	0.19761	1.79	0.0420522	NM_014028	OSTM1	Osteopetrosis associated transmembrane protein 1
8.04277	0.053507	7.20403	0.02753	1.79	0.000515163	D87454	KLHDC10	Kelch domain containing 10
8.48779	0.093557	7.65127	0.102625	1.79	0.00554187	NM_001550	IFRD1	Interferon-related developmental regulator 1
5.87646	0.066683	5.03996	0.247875	1.79	0.010019	ENST00000386760	-	ncrna:tRNA_pseudogene chromosome:NCBI36:16:3142610:3142681:-1 gene:ENSG00000209495
6.30087	0.097072	5.46629	0.077235	1.78	0.00550167	NM_022483	C5orf28	Chromosome 5 open reading frame 28
11.4649	0.030085	10.6304	0.00915	1.78	5.18948e-05	NM_005517	HMGN2	High-mobility group nucleosomal binding domain 2
7.4538	0.139893	6.62056	0.009255	1.78	0.0165466	NM_000358	TGFBI	Transforming growth factor, beta-induced, 68kDa
6.43891	0.066255	5.61231	0.214015	1.77	0.00735579	NM_021992	TMSB15A	Thymosin beta 15a
10.6729	0.033261	9.84665	0.05754	1.77	0.000172853	NM_005754	G3BP1	GTPase activating protein (SH3 domain) binding protein 1
8.59248	0.037052	7.76683	0.03893	1.77	0.000166682	NM_018993	RIN2	Ras and Rab interactor 2
7.01319	0.095871	6.18862	0.034175	1.77	0.0047597	NM_024917	TRMT2B	TRM2 tRNA methyltransferase 2 homolog B (S. cerevisiae)
8.04665	0.050828	7.223	0.0702	1.77	0.000710767	NM_001204	BMPR2	Bone morphogenetic protein receptor, type II (serine/threonine kinase)
5.05084	0.090386	4.22784	0.02586	1.77	0.00381374	NM_144666	DNHD1	Dynein heavy chain domain 1
5.70957	0.0757	4.88661	0.153015	1.77	0.0050243	NM_138341	TMEM116	Transmembrane protein 116
11.4448	0.028273	10.625	0.01145	1.77	4.45514e-05	NM_005517	HMGN2	High-mobility group nucleosomal binding domain 2
8.38207	0.03706	7.56264	0.13129	1.76	0.00110759	NM_001077351	RBM23	RNA binding motif protein 23
7.54336	0.051833	6.72476	0.188555	1.76	0.00417888	NM_016121	KCTD3	Potassium channel tetramerisation domain containing 3
6.31313	0.087569	5.49583	0.16733	1.76	0.00800953	NM_001145020	C6orf52	Chromosome 6 open reading frame 52
6.24264	0.0625	5.42738	0.0656	1.76	0.00132822	ENST00000363892	-	ncrna:rRNA chromosome:NCBI36:17:19841593:19841706:1 gene:ENSG00000200762
6.04192	0.063677	5.22992	0.04673	1.76	0.00123715	NM_014350	TNFAIP8	Tumor necrosis factor, alpha-induced protein 8
5.53444	0.119698	4.72605	0.094155	1.75	0.0127783	ENST00000362511	-	ncrna:snRNA chromosome:NCBI36:13:72353247:72353353:-1 gene:ENSG00000199381
7.10207	0.092742	6.29521	0.11351	1.75	0.00656836	NM_138458	WDR92	WD repeat domain 92
7.11146	0.077299	6.30589	0.02602	1.75	0.00233495	NM_030954	RNF170	Ring finger protein 170
8.9428	0.021008	8.14167	0.00567	1.74	1.45602e-05	NM_003076	SMARCD1	SWI/SNF related, matrix associated, actin dependent regulator of chromatin, subfamily d, member 1
5.07004	0.048047	4.26957	0.092325	1.74	0.000944834	NM_004133	HNF4G	Hepatocyte nuclear factor 4, gamma
5.82821	0.07634	5.02975	0.045475	1.74	0.0024766	NM_004836	EIF2AK3	Eukaryotic translation initiation factor 2-alpha kinase 3
8.50083	0.041083	7.70317	0.050095	1.74	0.000316915	NM_018492	PBK	PDZ binding kinase
4.71241	0.090863	3.91674	0.092955	1.74	0.0057421	8099922	-
9.69347	0.080515	8.90167	0.02836	1.73	0.00290753	NM_144586	LYPD1	LY6/PLAUR domain containing 1
6.04374	0.061711	5.25349	0.018065	1.73	0.00106163	NM_001137550	LRRFIP1	Leucine rich repeat (in FLII) interacting protein 1
5.61217	0.107776	4.8221	0.37986	1.73	0.049361	ENST00000363615	-	ncrna:misc_RNA chromosome:NCBI36:11:33174669:33174759:-1 gene:ENSG00000200485
4.0922	0.158087	3.30249	0.007535	1.73	0.0291163	NM_005323	HIST1H1T	Histone cluster 1, H1t
6.86299	0.089984	6.07563	0.00688	1.73	0.00431151	NM_024692	CLIP4	CAP-GLY domain containing linker protein family, member 4
3.86079	0.16981	3.07892	0.054815	1.72	0.03828	AF194537	-	Homo sapiens NAG13 (NAG13) mRNA, complete cds.
6.51939	0.081941	5.73846	0.097565	1.72	0.00463937	NM_178868	CMTM8	CKLF-like MARVEL transmembrane domain containing 8
6.25343	0.110116	5.47422	0.04731	1.72	0.0096863	AK096256	-	CDNA FLJ38937 fis, clone NT2NE2015511
4.46948	0.170179	3.69435	0.05707	1.71	0.0396106	NM_000767	CYP2B6	Cytochrome P450, family 2, subfamily B, polypeptide 6
8.831	0.025864	8.05787	0.03786	1.71	6.85005e-05	NM_005628	SLC1A5	Solute carrier family 1 (neutral amino acid transporter), member 5
6.95493	0.110344	6.18195	0.26396	1.71	0.0288049	ENST00000384143	-	ncrna:snRNA chromosome:NCBI36:14:60510798:60510906:1 gene:ENSG00000206870
4.7897	0.0881	4.01996	0.09674	1.7	0.00602541	ENST00000410821	-	ncrna:misc_RNA chromosome:NCBI36:6:34761101:34761397:-1 gene:ENSG00000222753
9.97829	0.057713	9.20922	0.021135	1.7	0.000925407	NM_003548	HIST2H4A	Histone cluster 2, H4a
9.97829	0.057713	9.20922	0.021135	1.7	0.000925407	NM_001034077	HIST2H4B	Histone cluster 2, H4b
8.62293	0.023958	7.85429	0.042985	1.7	6.61999e-05	NM_020772	NUFIP2	Nuclear fragile X mental retardation protein interacting protein 2
8.32441	0.039607	7.56179	0.018225	1.7	0.000227245	NM_006190	ORC2L	Origin recognition complex, subunit 2-like (yeast)
10.1714	0.063957	9.41128	0.04839	1.69	0.00163205	NM_005902	SMAD3	SMAD family member 3
4.72436	0.130054	3.96767	0.18051	1.69	0.0279218	NR_003046	-	small nucleolar RNA, C/D box 59B
9.17098	0.037223	8.41628	0.14243	1.69	0.00188444	NM_080652	TMEM41A	Transmembrane protein 41A
8.50627	0.035605	7.75235	0.060375	1.69	0.000314885	NM_001130113	RFC5	Replication factor C (activator 1) 5, 36.5kDa
3.13731	0.147097	2.38344	0.11404	1.69	0.0311573	NM_020061	OPN1LW	Opsin 1 (cone pigments), long-wave-sensitive
7.0591	0.103439	6.30783	0.057775	1.68	0.00916615	NM_001790	CDC25C	Cell division cycle 25 homolog C (S. pombe)
9.48524	0.07627	8.73466	0.053485	1.68	0.00323039	NM_175839	SMOX	Spermine oxidase
7.09573	0.120307	6.3469	0.090205	1.68	0.0165691	NM_006208	ENPP1	Ectonucleotide pyrophosphatase/phosphodiesterase 1
6.72915	0.1071	5.98142	0.002835	1.68	0.00963143	NM_024525	TTC13	Tetratricopeptide repeat domain 13
3.46939	0.140582	2.72423	0.01519	1.68	0.024225	ENST00000400767	-	hypothetical gene supported by BC029568
7.46262	0.07123	6.71753	0.049795	1.68	0.00257368	NM_014744	TBC1D5	TBC1 domain family, member 5
9.93502	0.029863	9.19341	0.035855	1.67	0.000119233	NM_080820	DTD1	D-tyrosyl-tRNA deacylase 1 homolog (S. cerevisiae)
6.00585	0.045056	5.27095	0.04029	1.66	0.000517635	NM_004827	ABCG2	ATP-binding cassette, sub-family G (WHITE), member 2
7.58399	0.111558	6.84951	0.22145	1.66	0.0270262	NM_133474	ZNF721	Zinc finger protein 721
8.18115	0.072714	7.44789	0.125585	1.66	0.0053478	NM_006635	ZNF460	Zinc finger protein 460
7.60449	0.083721	6.87231	0.02822	1.66	0.00446184	NM_015275	KIAA1033	KIAA1033
8.53764	0.037301	7.80849	0.02193	1.66	0.000223334	NM_015534	ZZZ3	Zinc finger, ZZ-type containing 3
9.068	0.025306	8.34209	0.10627	1.65	0.000648803	NM_031299	CDCA3	Cell division cycle associated 3
5.60613	0.115167	4.88108	0.04571	1.65	0.0143411	NM_174890	ANUBL1	AN1, ubiquitin-like, homolog (Xenopus laevis)
9.34085	0.012674	8.61602	0.033725	1.65	1.33607e-05	NM_005320	HIST1H1D	Histone cluster 1, H1d
7.06495	0.118296	6.34098	0.197975	1.65	0.028076	NM_080650	ATPBD4	ATP binding domain 4
9.69937	0.011988	8.97643	0.0127	1.65	3.22079e-06	NM_007285	GABARAPL2	GABA(A) receptor-associated protein-like 2
8.54282	0.049088	7.82103	0.02824	1.65	0.000673402	NM_144963	FAM91A1	Family with sequence similarity 91, member A1
7.89275	0.046454	7.17579	0.00265	1.64	0.00050374	NM_005431	XRCC2	X-ray repair complementing defective repair in Chinese hamster cells 2
7.32208	0.07407	6.60776	0.10288	1.64	0.00501588	NM_003541	HIST4H4	Histone cluster 4, H4
7.90032	0.063544	7.18628	0.067865	1.64	0.0023554	NM_005575	LNPEP	Leucyl/cystinyl aminopeptidase
10.3601	0.043294	9.64723	0.007275	1.64	0.000394831	NM_001070	TUBG1	Tubulin, gamma 1
9.13851	0.043929	8.42799	0.03517	1.64	0.000510862	NM_018247	TMEM30A	Transmembrane protein 30A
8.78677	0.043827	8.07794	0.086215	1.63	0.00109577	NM_001755	CBFB	Core-binding factor, beta subunit
8.93984	0.156249	8.23129	0.056165	1.63	0.0402946	NM_020716	GRAMD1B	GRAM domain containing 1B
6.71976	0.085271	6.01159	0.22761	1.63	0.0200613	NM_153261	TMEM188	Transmembrane protein 188
7.75654	0.029002	7.04849	0.155245	1.63	0.00248045	NM_057749	CCNE2	Cyclin E2
7.37241	0.062473	6.66658	0.0786	1.63	0.00258206	NM_182751	MCM10	Minichromosome maintenance complex component 10
6.15946	0.039742	5.45369	0.147615	1.63	0.00286078	NM_003531	HIST1H3C	Histone cluster 1, H3c
8.90943	0.092067	8.20555	0.05108	1.63	0.00764635	NM_001166	BIRC2	Baculoviral IAP repeat-containing 2
9.11155	0.03753	8.41155	0.129425	1.62	0.00197159	NM_205843	NFIC	Nuclear factor I/C (CCAAT-binding transcription factor)
6.08258	0.166029	5.38263	0.0138	1.62	0.0483701	NM_013257	SGK3	Serum/glucocorticoid regulated kinase family, member 3
8.67707	0.047369	7.97811	0.040015	1.62	0.000743956	NM_001128849	SMARCA4	SWI/SNF related, matrix associated, actin dependent regulator of chromatin, subfamily a, member 4
10.7334	0.06216	10.035	0.044445	1.62	0.00198116	NM_022731	NUCKS1	Nuclear casein kinase and cyclin-dependent kinase substrate 1
7.48348	0.059213	6.78939	0.034315	1.62	0.00160458	ENST00000388681	-	ncrna:snoRNA_pseudogene chromosome:NCBI36:2:53920380:53920470:-1 gene:ENSG00000211416
6.74273	0.152106	6.04914	0.09429	1.62	0.0420927	NM_001105206	LAMA4	Laminin, alpha 4
7.17662	0.075702	6.48598	0.08666	1.61	0.00529298	NM_019028	ZDHHC13	Zinc finger, DHHC-type containing 13
6.8301	0.031074	6.14027	0.04003	1.61	0.000196135	NM_018660	ZNF395	Zinc finger protein 395
4.90228	0.163169	4.21329	0.0248	1.61	0.0483343	AK123839	LOC100129112	Hypothetical protein LOC100129112
8.69272	0.040873	8.00376	0.12331	1.61	0.00209706	NM_032936	TMEM60	Transmembrane protein 60
7.01926	0.030218	6.33251	0.100505	1.61	0.00084944	NR_023318	-	ADP-dependent glucokinase
6.62265	0.064316	5.93867	0.08448	1.61	0.00334497	NM_145280	FAM119A	Family with sequence similarity 119, member A
10.0193	0.06061	9.33783	0.02469	1.6	0.00178447	NM_012321	LSM4	LSM4 homolog, U6 small nuclear RNA associated (S. cerevisiae)
8.75008	0.068939	8.06969	0.055285	1.6	0.00333549	NM_152594	SPRED1	Sprouty-related, EVH1 domain containing 1
8.23042	0.066286	7.55084	0.008225	1.6	0.00240855	NM_152562	CDCA2	Cell division cycle associated 2
8.05803	0.058245	7.37943	0.03745	1.6	0.00168011	NM_003529	HIST1H3A	Histone cluster 1, H3a
5.9828	0.155123	5.30452	0.103695	1.6	0.0482089	7950282	-
5.06365	0.118986	4.3859	0.17766	1.6	0.0316003	NM_020855	ZNF492	Zinc finger protein 492
3.46283	0.160956	2.78578	0.024495	1.6	0.0488665	ENST00000388594	-	ncrna:scRNA_pseudogene chromosome:NCBI36:8:70925937:70926211:-1 gene:ENSG00000211329
4.01612	0.153423	3.33966	0.03483	1.6	0.0429479	NR_026835	-	tigger transposable element derived 2 pseudogene
8.2277	0.12721	7.55168	0.08475	1.6	0.0268148	NM_024332	BRCC3	BRCA1/BRCA2-containing complex, subunit 3
10.6455	0.064313	9.97192	0.05678	1.6	0.00277907	NM_002572	PAFAH1B2	Platelet-activating factor acetylhydrolase, isoform Ib, subunit 2 (30kDa)
7.06349	0.051241	6.3899	0.045275	1.6	0.00118079	NM_032276	RHBDD1	Rhomboid domain containing 1
6.70364	0.057892	6.0306	0.04819	1.59	0.00183586	NM_001127392	C11orf9	Chromosome 11 open reading frame 9
6.51091	0.093094	5.83814	0.05578	1.59	0.00944857	NM_002354	EPCAM	Epithelial cell adhesion molecule
7.19812	0.057837	6.52637	0.07826	1.59	0.00247336	NM_017576	KIF27	Kinesin family member 27
8.57034	0.053501	7.89937	0.127285	1.59	0.00388826	NM_005346	HSPA1A	Heat shock 70kDa protein 1A
8.57034	0.053501	7.89937	0.127285	1.59	0.00388826	NM_005346	HSPA1A	Heat shock 70kDa protein 1A
7.02663	0.135428	6.35596	0.02342	1.59	0.0301222	NM_000617	SLC11A2	Solute carrier family 11 (proton-coupled divalent metal ion transporters), member 2
7.66357	0.018431	6.99469	0.0589	1.59	0.000124012	NM_012238	SIRT1	Sirtuin (silent mating type information regulation 2 homolog) 1 (S. cerevisiae)
8.35679	0.022817	7.68809	0.01475	1.59	4.62444e-05	NM_006620	HBS1L	HBS1-like (S. cerevisiae)
5.15666	0.103548	4.49075	0.277485	1.59	0.0444486	ENST00000365075	-	ncrna:snoRNA chromosome:NCBI36:12:120029229:120029360:1 gene:ENSG00000201945
7.56334	0.04333	6.89745	0.083175	1.59	0.00128438	NM_001017420	ESCO2	Establishment of cohesion 1 homolog 2 (S. cerevisiae)
7.75249	0.058625	7.08666	0.040555	1.59	0.00188522	NM_003503	CDC7	Cell division cycle 7 homolog (S. cerevisiae)
8.82547	0.041189	8.1604	0.05904	1.59	0.000746697	NM_006306	SMC1A	Structural maintenance of chromosomes 1A
8.97274	0.113108	8.30773	0.043435	1.59	0.0179583	NM_033274	ADAM19	ADAM metallopeptidase domain 19 (meltrin beta)
9.88031	0.044799	9.21936	0.03253	1.58	0.000704999	NM_001255	CDC20	Cell division cycle 20 homolog (S. cerevisiae)
8.34052	0.073992	7.67967	0.0171	1.58	0.00405824	NM_005327	HADH	Hydroxyacyl-Coenzyme A dehydrogenase
7.818	0.089051	7.15942	0.055715	1.58	0.0087947	NM_005628	SLC1A5	Solute carrier family 1 (neutral amino acid transporter), member 5
8.56677	0.055868	7.90839	0.12877	1.58	0.0046178	NM_005346	HSPA1A	Heat shock 70kDa protein 1A
7.16341	0.09665	6.50617	0.15651	1.58	0.0194061	NM_019018	FAM105A	Family with sequence similarity 105, member A
8.72898	0.029161	8.07329	0.030135	1.58	0.000159298	NM_020244	CHPT1	Choline phosphotransferase 1
5.76759	0.097532	5.11235	0.138925	1.57	0.0179675	NM_175055	HIST3H2BB	Histone cluster 3, H2bb
7.37075	0.110541	6.71985	0.006175	1.57	0.0171826	NM_006252	PRKAA2	Protein kinase, AMP-activated, alpha 2 catalytic subunit
9.63573	0.110967	8.98582	0.00731	1.57	0.0174955	NM_001136262	LOC552889	Hypothetical protein LOC552889
7.17492	0.065563	6.5252	0.038555	1.57	0.00301877	NM_032354	TMEM107	Transmembrane protein 107
8.20348	0.012454	7.55428	0.10437	1.57	0.000619927	NM_001085411	C5orf33	Chromosome 5 open reading frame 33
9.35534	0.037097	8.70688	0.03114	1.57	0.000384883	NM_018410	HJURP	Holliday junction recognition protein
6.23351	0.030148	5.58594	0.042845	1.57	0.000244195	NM_001338	CXADR	Coxsackie virus and adenovirus receptor
8.37152	0.096301	7.72564	0.0937	1.56	0.0141976	NM_000584	IL8	Interleukin 8
9.46888	0.030623	8.82302	0.017825	1.56	0.000165409	NM_006411	AGPAT1	1-acylglycerol-3-phosphate O-acyltransferase 1 (lysophosphatidic acid acyltransferase, alpha)
9.46888	0.030623	8.82302	0.017825	1.56	0.000165409	NM_006411	AGPAT1	1-acylglycerol-3-phosphate O-acyltransferase 1 (lysophosphatidic acid acyltransferase, alpha)
9.46888	0.030623	8.82302	0.017825	1.56	0.000165409	NM_006411	AGPAT1	1-acylglycerol-3-phosphate O-acyltransferase 1 (lysophosphatidic acid acyltransferase, alpha)
9.20773	0.040622	8.56319	0.08673	1.56	0.00134035	NM_012310	KIF4A	Kinesin family member 4A
8.35348	0.022845	7.70995	0.066015	1.56	0.000263899	NM_001005464	HIST2H3A	Histone cluster 2, H3a
8.35348	0.022845	7.70995	0.066015	1.56	0.000263899	NM_001005464	HIST2H3A	Histone cluster 2, H3a
6.24417	0.117135	5.60163	0.058985	1.56	0.0231244	NM_006474	PDPN	Podoplanin
8.07474	0.044051	7.43248	0.026085	1.56	0.000699982	NM_152444	PTGR2	Prostaglandin reductase 2
9.51176	0.019836	8.87026	0.013505	1.56	3.17294e-05	NM_015918	POP5	Processing of precursor 5, ribonuclease P/MRP subunit (S. cerevisiae)
7.92924	0.026565	7.29021	0.076485	1.56	0.000484247	NM_030650	KIAA1715	KIAA1715
9.72257	0.02554	9.08374	0.003475	1.56	7.62296e-05	NM_004753	DHRS3	Dehydrogenase/reductase (SDR family) member 3
7.38069	0.069068	6.7431	0.083665	1.56	0.00527061	NM_001145001	NEK6	NIMA (never in mitosis gene a)-related kinase 6
3.46842	0.047349	2.83121	0.00548	1.56	0.000857746	ENST00000332558	-	hypothetical FLJ40288
5.87941	0.130076	5.24255	0.19235	1.55	0.0490943	NR_026588	-	EF-hand calcium binding domain 2
6.4589	0.043606	5.82205	0.068615	1.55	0.00120969	NM_004327	BCR	Breakpoint cluster region
9.46189	0.031523	8.82678	0.01641	1.55	0.000193834	NM_012426	SF3B3	Splicing factor 3b, subunit 3, 130kDa
9.90971	0.041768	9.27555	0.13986	1.55	0.00393974	NM_005345	HSPA1A	Heat shock 70kDa protein 1A
7.60513	0.03525	6.97213	0.081745	1.55	0.000963827	NM_004685	MTMR6	Myotubularin related protein 6
6.1941	0.061884	5.56126	0.099485	1.55	0.00468285	NM_001080392	KIAA1147	KIAA1147
7.41448	0.085292	6.78398	0.13874	1.55	0.0147881	NM_031439	SOX7	SRY (sex determining region Y)-box 7
8.18666	0.096112	7.55735	0.05109	1.55	0.0129931	NM_181671	PITPNC1	Phosphatidylinositol transfer protein, cytoplasmic 1
9.09674	0.01692	8.4678	0.05804	1.55	0.000135134	NM_002874	RAD23B	RAD23 homolog B (S. cerevisiae)
9.1313	0.011838	8.50302	0.04075	1.55	3.33506e-05	NM_006706	TCERG1	Transcription elongation regulator 1
8.217	0.050004	7.59055	0.01165	1.54	0.001143	NM_021214	FAM108C1	Family with sequence similarity 108, member C1
7.77937	0.084989	7.15583	0.024115	1.54	0.00828676	NM_012200	B3GAT3	Beta-1,3-glucuronyltransferase 3 (glucuronosyltransferase I)
5.19054	0.094798	4.56788	0.1073	1.54	0.0164701	NM_022843	PCDH20	Protocadherin 20
7.93712	0.043	7.31466	0.014995	1.54	0.000670367	NM_014873	LPGAT1	Lysophosphatidylglycerol acyltransferase 1
8.81269	0.048845	8.1903	0.02287	1.54	0.00112782	NM_153712	TTL	Tubulin tyrosine ligase
7.32912	0.097809	6.7078	0.0344	1.54	0.0137849	NM_001964	EGR1	Early growth response 1
7.47356	0.095391	6.85273	0.19212	1.54	0.0285315	NM_002393	MDM4	Mdm4 p53 binding protein homolog (mouse)
4.17356	0.065891	3.55313	0.02225	1.54	0.00340427	NM_001012418	MYLK4	Myosin light chain kinase family, member 4
7.88603	0.0152	7.26577	0.093385	1.54	0.000545933	NM_005726	TSFM	Ts translation elongation factor, mitochondrial
9.95419	0.038089	9.33456	0.128765	1.54	0.00312687	NM_005345	HSPA1A	Heat shock 70kDa protein 1A
7.23533	0.016902	6.61694	0.02981	1.54	3.84285e-05	NM_020726	NLN	Neurolysin (metallopeptidase M3 family)
8.46084	0.07107	7.84282	0.00094	1.53	0.00440241	NM_002061	GCLM	Glutamate-cysteine ligase, modifier subunit
6.86399	0.129892	6.24646	0.01382	1.53	0.0339724	NM_144579	SFXN5	Sideroflexin 5
5.30875	0.087875	4.69172	0.268655	1.53	0.0429433	AY358191	UNQ6167	NINP6167
5.93276	0.041246	5.31583	0.270595	1.53	0.0251725	NM_001025101	MBP	Myelin basic protein
7.76887	0.073225	7.15292	0.063335	1.53	0.00613732	NM_152707	SLC25A16	Solute carrier family 25 (mitochondrial carrier; Graves disease autoantigen), member 16
10.1142	0.035102	9.49887	0.056825	1.53	0.000619808	NM_003463	PTP4A1	Protein tyrosine phosphatase type IVA, member 1
7.82346	0.03933	7.20821	0.1948	1.53	0.00985809	NM_024094	DSCC1	Defective in sister chromatid cohesion 1 homolog (S. cerevisiae)
7.81101	0.060523	7.19646	0.15645	1.53	0.00961746	NM_021825	CCDC90B	Coiled-coil domain containing 90B
6.45139	0.077443	5.83734	0.04606	1.53	0.00680645	NR_022008	-	Prader-Willi/Angelman syndrome-5
8.09262	0.026757	7.47983	0.059735	1.53	0.000351462	NM_003579	RAD54L	RAD54-like (S. cerevisiae)
6.9144	0.057753	6.30211	0.180465	1.53	0.0120575	NM_004327	BCR	Breakpoint cluster region
3.79518	0.062589	3.18298	0.153685	1.53	0.00999131	ENST00000298953	-	chromosome 12 open reading frame 55
8.1355	0.100981	7.52534	0.02675	1.53	0.0160653	NM_022491	SUDS3	Suppressor of defective silencing 3 homolog (S. cerevisiae)
8.13347	0.02717	7.52383	0.13616	1.53	0.00277915	NM_001080443	KIF18B	Kinesin family member 18B
8.22729	0.057168	7.61845	0.051375	1.53	0.00263203	NM_001080443	KIF18B	Kinesin family member 18B
8.12309	0.005466	7.5164	0.007015	1.52	3.24572e-07	NM_012100	DNPEP	Aspartyl aminopeptidase
5.45259	0.093979	4.84966	0.07713	1.52	0.0154059	ENST00000386315	-	ncrna:scRNA_pseudogene chromosome:NCBI36:22:22551349:22551606:-1 gene:ENSG00000209050
9.91105	0.024856	9.30816	0.02206	1.52	0.000109136	NM_001168	BIRC5	Baculoviral IAP repeat-containing 5
6.72007	0.074249	6.11799	0.04139	1.52	0.00620709	NM_000212	ITGB3	Integrin, beta 3 (platelet glycoprotein IIIa, antigen CD61)
5.80969	0.027103	5.20791	0.02412	1.52	0.000154784	NM_015691	WWC3	WWC family member 3
10.9425	0.061427	10.3412	0.04155	1.52	0.00326219	NM_014501	UBE2S	Ubiquitin-conjugating enzyme E2S
4.28616	0.097589	3.6862	0.115815	1.52	0.021046	NM_005208	CRYBA1	Crystallin, beta A1
7.68537	0.034107	7.08594	0.03998	1.52	0.000453458	NM_000185	SERPIND1	Serpin peptidase inhibitor, clade D (heparin cofactor), member 1
7.03828	0.098936	6.43997	0.21912	1.51	0.0403188	NM_002875	RAD51	RAD51 homolog (RecA homolog, E. coli) (S. cerevisiae)
4.61531	0.114071	4.01757	0.126305	1.51	0.0334294	NM_019858	GPR162	G protein-coupled receptor 162
7.68157	0.080855	7.08422	0.018355	1.51	0.00801963	BC014881	C9orf80	Chromosome 9 open reading frame 80
9.34868	0.008452	8.75136	0.024305	1.51	6.83823e-06	NM_012262	HS2ST1	Heparan sulfate 2-O-sulfotransferase 1
5.2244	0.091239	4.62789	0.062	1.51	0.0136964	XM_944578	-	hypothetical LOC646049
5.32655	0.092255	4.73009	0.17823	1.51	0.0276755	ENST00000387756	-	ncrna:scRNA_pseudogene chromosome:NCBI36:6:28219251:28219333:1 gene:ENSG00000210491
6.32367	0.136604	5.72877	0.07095	1.51	0.0468622	ENST00000385364	-	ncrna:Mt_tRNA_pseudogene chromosome:NCBI36:2:212350978:212351050:-1 gene:ENSG00000208099
7.76508	0.027365	7.171	0.15873	1.51	0.00489527	NM_006963	ZNF22	Zinc finger protein 22 (KOX 15)
6.32657	0.09953	5.73252	0.089025	1.51	0.0201628	NM_138463	TLCD1	TLC domain containing 1
8.50176	0.030002	7.90798	0.002795	1.51	0.000191149	NM_003779	B4GALT3	UDP-Gal:betaGlcNAc beta 1,4- galactosyltransferase, polypeptide 3
7.95549	0.0607	7.36287	0.00655	1.51	0.00288599	NM_005057	RBBP5	Retinoblastoma binding protein 5
3.11863	0.045316	2.52613	0.06612	1.51	0.00170061	NM_152573	RASEF	RAS and EF-hand domain containing
10.9301	0.120236	10.3377	0.06195	1.51	0.0324468	NM_001017998	GNG10	Guanine nucleotide binding protein (G protein), gamma 10
6.45612	0.070024	5.86367	0.019455	1.51	0.00497763	NR_002560	-	small nucleolar RNA, C/D box 31
8.10108	0.046006	7.50892	0.011755	1.51	0.00103444	NM_145040	PRKCDBP	Protein kinase C, delta binding protein
9.30691	0.016961	8.71481	0.080295	1.51	0.000433035	NM_001659	ARF3	ADP-ribosylation factor 3
7.20301	0.055779	6.61296	0.194585	1.51	0.0154428	NM_020143	PNO1	Partner of NOB1 homolog (S. cerevisiae)
10.7454	0.07734	10.1557	0.00475	1.5	0.00707287	NM_002204	ITGA3	Integrin, alpha 3 (antigen CD49C, alpha 3 subunit of VLA-3 receptor)
8.25421	0.113059	7.66528	0.024455	1.5	0.0258359	NM_020474	GALNT1	UDP-N-acetyl-alpha-D-galactosamine:polypeptide N-acetylgalactosaminyltransferase 1 (GalNAc-T1)
6.93398	0.090898	6.34591	0.020875	1.5	0.0127043	AF277175	KLHDC10	Kelch domain containing 10
9.65322	0.046563	9.0653	0.00738	1.5	0.00109921	NM_017892	PRPF40A	PRP40 pre-mRNA processing factor 40 homolog A (S. cerevisiae)
4.56255	0.082758	3.9758	0.053365	1.5	0.010254	AY358662	ZCCHC2	Zinc finger, CCHC domain containing 2
7.41233	0.054442	6.82608	0.05649	1.5	0.00271498	NM_004860	FXR2	Fragile X mental retardation, autosomal homolog 2
5.85198	0.044937	5.26753	0.00176	1.5	0.000974073	NM_004327	BCR	Breakpoint cluster region
8.6017	0.046363	8.01757	0.02098	1.5	0.00117223	NM_138619	GGA3	Golgi associated, gamma adaptin ear containing, ARF binding protein 3
11.6291	0.034609	11.0466	0.08005	1.5	0.00122919	NM_005381	NCL	Nucleolin
7.26436	0.043893	6.68311	0.04743	1.5	0.00127642	NM_017736	THUMPD1	THUMP domain containing 1
7.10171	0.109848	6.52064	0.10356	1.5	0.0301825	NM_020182	PMEPA1	Prostate transmembrane protein, androgen induced 1
9.0344	0.038871	8.45361	0.037975	1.5	0.000758721	NM_007362	NCBP2	Nuclear cap binding protein subunit 2, 20kDa
10.8852	0.030177	10.3052	0.07175	1.49	0.000777591	NM_003544	HIST1H4B	Histone cluster 1, H4b
8.65585	0.032571	8.07597	0.045725	1.49	0.000501579	NM_001123375	HIST2H3D	Histone cluster 2, H3d
6.407	0.107325	5.82721	0.027985	1.49	0.0231423	NM_000965	RARB	Retinoic acid receptor, beta
7.40111	0.022711	6.82182	0.05112	1.49	0.000234081	NM_002017	FLI1	Friend leukemia virus integration 1
7.07254	0.047164	6.49356	0.08701	1.49	0.00282928	NM_138368	DKFZp761E198	DKFZp761E198 protein
6.43052	0.08716	5.8525	0.13623	1.49	0.0203496	BC119675	FAM27E3	Family with sequence similarity 27, member E3
6.43052	0.08716	5.8525	0.13623	1.49	0.0203496	BC119675	FAM27E3	Family with sequence similarity 27, member E3
6.43052	0.08716	5.8525	0.13623	1.49	0.0203496	BC119675	FAM27E3	Family with sequence similarity 27, member E3
4.4332	0.068326	3.8553	0.17769	1.49	0.0180539	NM_000499	CYP1A1	Cytochrome P450, family 1, subfamily A, polypeptide 1
9.6083	0.059478	9.03135	0.012075	1.49	0.00298315	NM_005669	REEP5	Receptor accessory protein 5
8.51448	0.029099	7.93947	0.032195	1.49	0.000275928	NM_001128620	PAK1	P21 protein (Cdc42/Rac)-activated kinase 1
9.20991	0.054887	8.63543	0.07246	1.49	0.0035622	NM_004217	AURKB	Aurora kinase B
2.49775	0.024294	1.92378	0.034225	1.49	0.000166636	NM_173665	C5orf36	Chromosome 5 open reading frame 36
5.08428	0.075277	4.51041	0.202375	1.49	0.0267076	ENST00000410338	-	ncrna:rRNA chromosome:NCBI36:10:57027564:57027936:1 gene:ENSG00000222270
2.38455	0.061848	1.81117	0.109215	1.49	0.00741936	NM_173857	VN1R4	Vomeronasal 1 receptor 4
10.2957	0.064047	9.72268	0.01749	1.49	0.00405909	NM_003088	FSCN1	Fascin homolog 1, actin-bundling protein (Strongylocentrotus purpuratus)
6.91241	0.059918	6.34065	0.065735	1.49	0.00437877	NM_152559	WBSCR27	Williams Beuren syndrome chromosome region 27
6.12079	0.038598	5.54946	0.14367	1.49	0.00559967	NM_033215	PPP1R3F	Protein phosphatase 1, regulatory (inhibitor) subunit 3F
8.49051	0.04965	7.91977	0.022535	1.49	0.00166122	NM_001111	ADAR	Adenosine deaminase, RNA-specific
6.58699	0.081621	6.01692	0.207845	1.48	0.0320374	NM_153211	TTC39C	Tetratricopeptide repeat domain 39C
3.80092	0.068698	3.23118	0.123335	1.48	0.0111653	NM_019036	HMGCLL1	3-hydroxymethyl-3-methylglutaryl-Coenzyme A lyase-like 1
7.71	0.07194	7.14086	0.002605	1.48	0.00619641	NM_147202	C9orf25	Chromosome 9 open reading frame 25
9.25763	0.044275	8.68851	0.07012	1.48	0.00197593	NM_181353	ID1	Inhibitor of DNA binding 1, dominant negative helix-loop-helix protein
4.42418	0.061409	3.85508	0.09228	1.48	0.00622787	AB449914	TBC1D30	TBC1 domain family, member 30
7.06478	0.011309	6.49597	0.116525	1.48	0.00148973	NM_005126	NR1D2	Nuclear receptor subfamily 1, group D, member 2
8.90561	0.050847	8.33699	0.103185	1.48	0.00456094	NR_024117	-	misato homolog 2 pseudogene
8.52446	0.066248	7.95601	0.136035	1.48	0.0118396	NM_018352	C4orf43	Chromosome 4 open reading frame 43
8.38486	0.039306	7.81689	0.031965	1.48	0.000794385	NM_018452	C6orf35	Chromosome 6 open reading frame 35
4.63762	0.087744	4.06987	0.168735	1.48	0.0274554	NM_001013690	FIGNL2	Fidgetin-like 2
7.26886	0.017653	6.70214	0.04433	1.48	0.000116781	NM_153034	ZNF488	Zinc finger protein 488
3.90643	0.11219	3.34037	0.04636	1.48	0.029466	ENST00000357149	-	cdna:pseudogene chromosome:NCBI36:5:115581664:115581891:-1 gene:ENSG00000197255
7.0623	0.018826	6.49648	0.118135	1.48	0.00188606	NM_001004304	ZNF740	Zinc finger protein 740
7.18389	0.067073	6.61855	0.0818	1.48	0.0073325	NM_025191	EDEM3	ER degradation enhancer, mannosidase alpha-like 3
7.3861	0.09239	6.82172	0.06372	1.48	0.0172467	BX641032	-	WEE1 homolog (S. pombe)
8.41262	0.061187	7.84865	0.068525	1.48	0.00503007	NM_025232	REEP4	Receptor accessory protein 4
6.70709	0.026126	6.14331	0.00702	1.48	0.000138906	NM_015144	ZCCHC14	Zinc finger, CCHC domain containing 14
10.5924	0.056038	10.0289	0.0233	1.48	0.00271606	NM_014501	UBE2S	Ubiquitin-conjugating enzyme E2S
6.22843	0.047674	5.66579	0.12131	1.48	0.00548286	NM_001361	DHODH	Dihydroorotate dehydrogenase
9.48502	0.085648	8.92339	0.0432	1.48	0.0128297	NM_032997	ZWINT	ZW10 interactor
7.96087	0.028411	7.39969	0.03191	1.48	0.000279161	NM_016035	COQ4	Coenzyme Q4 homolog (S. cerevisiae)
3.16048	0.078911	2.59944	0.056115	1.48	0.0104031	ENST00000387015	-	ncrna:snoRNA_pseudogene chromosome:NCBI36:17:17990591:17990680:1 gene:ENSG00000209750
7.77166	0.048811	7.21071	0.03692	1.48	0.00185267	NM_145693	LPIN1	Lipin 1
5.3786	0.115224	4.81819	0.08833	1.47	0.0364169	ENST00000388632	-	ncrna:snoRNA_pseudogene chromosome:NCBI36:8:71679321:71679421:1 gene:ENSG00000211367
8.19043	0.025289	7.63018	0.030245	1.47	0.000186292	NM_021627	SENP2	SUMO1/sentrin/SMT3 specific peptidase 2
7.06077	0.032862	6.50065	0.1635	1.47	0.00739018	NM_003519	HIST1H2BL	Histone cluster 1, H2bl
8.51031	0.028708	7.95036	0.014835	1.47	0.00021983	NM_024771	NAT11	N-acetyltransferase 11 (GCN5-related, putative)
8.64447	0.05292	8.08512	0.08243	1.47	0.00401308	NM_176818	GATC	Glutamyl-tRNA(Gln) amidotransferase, subunit C homolog (bacterial)
4.22936	0.067762	3.67062	0.258315	1.47	0.0410797	NM_001039901	-	Homo sapiens hypothetical protein LOC644201 (FLJ43798), mRNA.
3.12286	0.128491	2.56437	0.06594	1.47	0.0470523	NM_020227	PRDM9	PR domain containing 9
4.52764	0.108828	3.9699	0.072005	1.47	0.0299772	NM_182504	WBSCR28	Williams-Beuren syndrome chromosome region 28
4.69631	0.038824	4.13901	0.00071	1.47	0.000666229	ENST00000387196	-	ncrna:scRNA_pseudogene chromosome:NCBI36:1:33267420:33267764:-1 gene:ENSG00000209931
8.04063	0.0179	7.48377	0.073325	1.47	0.000441189	NM_020412	CHMP1B	Chromatin modifying protein 1B
5.27671	0.049695	4.72039	0.28045	1.47	0.0410836	BC029383	DKFZp566H0824	Hypothetical LOC54744
5.17704	0.068641	4.62119	0.03091	1.47	0.00604769	NM_004530	MMP2	Matrix metallopeptidase 2 (gelatinase A, 72kDa gelatinase, 72kDa type IV collagenase)
8.41924	0.043286	7.86348	0.017275	1.47	0.00107542	NM_018452	C6orf35	Chromosome 6 open reading frame 35
9.2284	0.023705	8.67355	0.034645	1.47	0.00017937	NM_021639	GPBP1L1	GC-rich promoter binding protein 1-like 1
4.30552	0.10013	3.75214	0.06773	1.47	0.0237662	NR_026586	-	EF-hand calcium binding domain 2
6.05654	0.067676	5.50345	0.15717	1.47	0.0167635	BC071695	C11orf71	Chromosome 11 open reading frame 71
8.7013	0.030826	8.14893	0.01926	1.47	0.000318193	NM_001123375	HIST2H3D	Histone cluster 2, H3d
4.60878	0.06053	4.05675	0.096055	1.47	0.00696984	NM_005574	LMO2	LIM domain only 2 (rhombotin-like 1)
9.0424	0.086662	8.49038	0.072705	1.47	0.0158991	NM_016343	CENPF	Centromere protein F, 350/400ka (mitosin)
9.69288	0.074836	9.14133	0.00247	1.47	0.00796961	NM_001079559	HNRNPUL2	Heterogeneous nuclear ribonucleoprotein U-like 2
9.98472	0.06719	9.43324	0.11263	1.47	0.0106934	NM_001985	ETFB	Electron-transfer-flavoprotein, beta polypeptide
5.68185	0.107616	5.1304	0.12687	1.47	0.0369958	NM_145649	GCNT2	Glucosaminyl (N-acetyl) transferase 2, I-branching enzyme (I blood group)
7.38695	0.037673	6.83631	0.152685	1.46	0.00728148	NM_014641	MDC1	Mediator of DNA damage checkpoint 1
7.38695	0.037673	6.83631	0.152685	1.46	0.00728148	NM_014641	MDC1	Mediator of DNA damage checkpoint 1
7.66223	0.096366	7.11425	0.066245	1.46	0.0217728	NM_001006634	ARHGAP17	Rho GTPase activating protein 17
6.594	0.061517	6.04684	0.18003	1.46	0.0190071	NM_030777	SLC2A10	Solute carrier family 2 (facilitated glucose transporter), member 10
9.62885	0.012878	9.08268	0.009445	1.46	1.10456e-05	NM_152930	RBM12	RNA binding motif protein 12
6.33578	0.032629	5.78963	0.16737	1.46	0.0085946	NM_003536	HIST1H3H	Histone cluster 1, H3h
5.59467	0.037848	5.04889	0.23376	1.46	0.0239243	ENST00000384345	-	ncrna:misc_RNA chromosome:NCBI36:19:54761741:54761841:1 gene:ENSG00000207073
11.1661	0.046678	10.6207	0.01865	1.46	0.00154059	NM_175065	HIST2H2AB	Histone cluster 2, H2ab
8.42983	0.082574	7.88525	0.152385	1.46	0.0246351	NM_138777	MRRF	Mitochondrial ribosome recycling factor
9.43944	0.025091	8.89516	0.02048	1.46	0.000163513	NM_005121	MED13	Mediator complex subunit 13
8.16499	0.060914	7.62075	0.075645	1.46	0.00603512	NM_016076	PPPDE1	PPPDE peptidase domain containing 1
6.33425	0.077537	5.79089	0.10374	1.46	0.0148519	NM_000596	IGFBP1	Insulin-like growth factor binding protein 1
5.72158	0.043013	5.18073	0.03019	1.45	0.00128779	NM_021062	HIST1H2BB	Histone cluster 1, H2bb
5.76382	0.052165	5.22382	0.19661	1.45	0.0197638	NM_017412	FZD3	Frizzled homolog 3 (Drosophila)
8.41209	0.073816	7.8721	0.00201	1.45	0.00818051	NM_182488	USP12	Ubiquitin specific peptidase 12
4.60562	0.101023	4.06721	0.1641	1.45	0.0415083	NM_015613	LRIT1	Leucine-rich repeat, immunoglobulin-like and transmembrane domains 1
6.09903	0.054015	5.56079	0.077735	1.45	0.00459999	NM_018328	MBD5	Methyl-CpG binding domain protein 5
6.15222	0.013279	5.61458	0.20195	1.45	0.012725	NM_002784	PSG9	Pregnancy specific beta-1-glycoprotein 9
6.92425	0.104277	6.38762	0.074835	1.45	0.0301473	NM_031482	ATG10	ATG10 autophagy related 10 homolog (S. cerevisiae)
8.01409	0.064874	7.47752	0.021555	1.45	0.00545566	NM_002697	POU2F1	POU class 2 homeobox 1
6.04022	0.08529	5.50455	0.057515	1.45	0.0156438	NM_170740	ALDH5A1	Aldehyde dehydrogenase 5 family, member A1
9.55965	0.016898	9.02401	0.00558	1.45	3.072e-05	NM_020337	ANKRD50	Ankyrin repeat domain 50
8.19549	0.045526	7.66129	0.05937	1.45	0.00230711	NM_004656	BAP1	BRCA1 associated protein-1 (ubiquitin carboxy-terminal hydrolase)
8.97809	0.068732	8.44429	0.134975	1.45	0.0156084	NM_022736	MFSD1	Major facilitator superfamily domain containing 1
8.71515	0.009456	8.18153	0.12704	1.45	0.00251425	NM_000521	HEXB	Hexosaminidase B (beta polypeptide)
5.10053	0.059161	4.56761	0.08388	1.45	0.00652752	NM_014581	OBP2B	Odorant binding protein 2B
2.8474	0.114745	2.31513	0.01413	1.45	0.0366252	NM_002171	IFNA10	Interferon, alpha 10
6.62144	0.070493	6.08983	0.02293	1.45	0.0075772	NM_002829	PTPN3	Protein tyrosine phosphatase, non-receptor type 3
4.68796	0.084637	4.15648	0.043615	1.45	0.0148944	ENST00000386877	-	ncrna:snRNA_pseudogene chromosome:NCBI36:11:31813763:31813886:1 gene:ENSG00000209612
8.84599	0.032064	8.31456	0.04018	1.45	0.000598939	NM_024322	CENPO	Centromere protein O
6.95292	0.091972	6.42246	0.17349	1.44	0.0381614	NM_052916	RNF157	Ring finger protein 157
6.93834	0.025996	6.40839	0.034055	1.44	0.000277846	NR_001453	HSPA8	Heat shock 70kDa protein 8
9.59218	0.063161	9.06381	0.031175	1.44	0.00544502	NM_016101	NIP7	Nuclear import 7 homolog (S. cerevisiae)
10.3588	0.042046	9.8308	0.01552	1.44	0.00116259	NM_007126	VCP	Valosin-containing protein
9.30241	0.10824	8.77521	0.01626	1.44	0.0316443	NM_022754	SFXN1	Sideroflexin 1
4.16454	0.087724	3.63736	0.130385	1.44	0.0266549	NM_001558	IL10RA	Interleukin 10 receptor, alpha
5.82451	0.083816	5.29739	0.146025	1.44	0.0268637	NM_021255	PELI2	Pellino homolog 2 (Drosophila)
9.12187	0.061701	8.5951	0.0367	1.44	0.00522116	NM_182752	TPRG1L	Tumor protein p63 regulated 1-like
7.02263	0.100393	6.49609	0.08529	1.44	0.0298363	NM_021178	CCNB1IP1	Cyclin B1 interacting protein 1
6.75608	0.060358	6.23004	0.086865	1.44	0.0074401	NM_006624	ZMYND11	Zinc finger, MYND domain containing 11
9.08478	0.100645	8.55889	0.02543	1.44	0.0256987	NM_015176	FBXO28	F-box protein 28
4.90237	0.038465	4.3768	0.23949	1.44	0.0289743	NM_001017971	ATP6AP1L	ATPase, H+ transporting, lysosomal accessory protein 1-like
6.00505	0.083105	5.48024	0.04738	1.44	0.0148477	NM_001134476	LRRC8B	Leucine rich repeat containing 8 family, member B
3.75411	0.100388	3.22946	0.079495	1.44	0.0295097	ENST00000386793	-	ncrna:scRNA_pseudogene chromosome:NCBI36:16:3624836:3625120:-1 gene:ENSG00000209528
8.33548	0.024553	7.81095	0.008495	1.44	0.000146758	NM_014160	MKRN2	Makorin ring finger protein 2
7.3369	0.040902	6.81278	0.059275	1.44	0.00182262	NM_199249	C19orf48	Chromosome 19 open reading frame 48
11.174	0.02704	10.6501	0.02375	1.44	0.000262541	NM_001071	TYMS	Thymidylate synthetase
4.51191	0.082791	3.98823	0.000275	1.44	0.013512	NM_205850	SLC24A5	Solute carrier family 24, member 5
7.12816	0.059817	6.60477	0.06688	1.44	0.00606001	NR_003329	-	small nuclear ribonucleoprotein polypeptide N
9.4891	0.031956	8.96642	0.024605	1.44	0.000482346	NM_004728	DDX21	DEAD (Asp-Glu-Ala-Asp) box polypeptide 21
8.42495	0.108647	7.90311	0.08151	1.44	0.0375973	NM_004772	C5orf13	Chromosome 5 open reading frame 13
8.91847	0.067499	8.39687	0.00446	1.44	0.00674518	NM_006101	NDC80	NDC80 homolog, kinetochore complex component (S. cerevisiae)
7.09649	0.037253	6.5751	0.013355	1.44	0.000765087	NM_001167	XIAP	X-linked inhibitor of apoptosis
5.49768	0.086181	4.97649	0.080265	1.44	0.0196304	NM_001080824	LOC129293	Hypothetical protein LOC129293
8.13481	0.025381	7.61367	0.073825	1.44	0.00091288	NM_153638	PANK2	Pantothenate kinase 2
7.57539	0.07743	7.05432	0.12041	1.44	0.01931	NM_178012	TUBB2B	Tubulin, beta 2B
10.0845	0.049217	9.56367	0.037515	1.43	0.00253064	NM_018087	TMEM48	Transmembrane protein 48
4.86151	0.071618	4.34134	0.073395	1.43	0.0111017	NM_002016	FLG	Filaggrin
7.10899	0.056121	6.58889	0.065325	1.43	0.00505605	NM_001098402	ZNF295	Zinc finger protein 295
8.17898	0.066713	7.66003	0.248635	1.43	0.0464765	BC008502	C4orf34	Chromosome 4 open reading frame 34
7.32144	0.018842	6.8026	0.103855	1.43	0.00172964	NM_024857	ATAD5	ATPase family, AAA domain containing 5
6.20319	0.057711	5.68501	0.080285	1.43	0.00649369	NM_001030059	PPAPDC1A	Phosphatidic acid phosphatase type 2 domain containing 1A
5.14649	0.109953	4.62859	0.04265	1.43	0.0361701	NM_003980	MAP7	Microtubule-associated protein 7
8.2363	0.042966	7.71861	0.031025	1.43	0.001527	NM_020662	MRS2	MRS2 magnesium homeostasis factor homolog (S. cerevisiae)
8.07337	0.110333	7.55616	0.05778	1.43	0.0378036	NM_001128429	SMARCAD1	SWI/SNF-related, matrix-associated actin-dependent regulator of chromatin, subfamily a, containing DEAD/H box 1
5.27938	0.116062	4.76264	0.062705	1.43	0.044182	ENST00000387066	-	ncrna:snRNA_pseudogene chromosome:NCBI36:3:12531205:12531303:1 gene:ENSG00000209801
8.37825	0.078057	7.86172	0.113735	1.43	0.0192435	NM_021934	C12orf44	Chromosome 12 open reading frame 44
6.72527	0.095575	6.20911	0.125905	1.43	0.0338291	NM_018441	PECR	Peroxisomal trans-2-enoyl-CoA reductase
4.65698	0.057541	4.14083	0.03383	1.43	0.00435376	NM_006439	MAB21L2	Mab-21-like 2 (C. elegans)
8.50771	0.032211	7.9917	0.033805	1.43	0.000603727	NM_005023	PGGT1B	Protein geranylgeranyltransferase type I, beta subunit
2.92177	0.073433	2.40623	0.14665	1.43	0.022208	ENST00000388085	-	ncrna:snRNA_pseudogene chromosome:NCBI36:9:38670003:38670101:1 gene:ENSG00000210820
4.26635	0.08971	3.75136	0.182335	1.43	0.0421703	NM_181840	KCNK18	Potassium channel, subfamily K, member 18
8.16629	0.027158	7.65299	0.05497	1.43	0.000628957	NR_027241	-	hypothetical LOC388796
10.1942	0.049648	9.6814	0.106215	1.43	0.0065793	NM_007002	ADRM1	Adhesion regulating molecule 1
7.91425	0.062748	7.40175	0.058785	1.43	0.00705215	NM_175040	ST6GALNAC4	ST6 (alpha-N-acetyl-neuraminyl-2,3-beta-galactosyl-1,3)-N-acetylgalactosaminide alpha-2,6-sialyltransferase 4
6.34509	0.044899	5.83268	0.052695	1.43	0.00236247	NM_020925	CACHD1	Cache domain containing 1
10.4802	0.038264	9.96786	0.00466	1.43	0.000874838	NM_005030	PLK1	Polo-like kinase 1 (Drosophila)
7.68239	0.046403	7.17181	0.25716	1.42	0.0413297	NM_021937	EEFSEC	Eukaryotic elongation factor, selenocysteine-tRNA-specific
7.05746	0.070613	6.54729	0.05599	1.42	0.0101648	NM_021968	HIST1H4H	Histone cluster 1, H4h
8.19495	0.039535	7.68535	0.01851	1.42	0.00107923	NM_024594	PANK3	Pantothenate kinase 3
7.35387	0.117386	6.84567	0.027135	1.42	0.045313	NM_006875	PIM2	Pim-2 oncogene
7.87035	0.032715	7.36238	0.068775	1.42	0.00141905	NM_003172	SURF1	Surfeit 1
6.17263	0.086314	5.66498	0.029275	1.42	0.0177837	NM_001004301	ZNF813	Zinc finger protein 813
9.34812	0.058711	8.84084	0.055555	1.42	0.00579501	NM_018101	CDCA8	Cell division cycle associated 8
3.1245	0.106602	2.61723	0.010465	1.42	0.0338647	NM_032165	LRRIQ1	Leucine-rich repeats and IQ motif containing 1
5.05419	0.045947	4.54726	0.2646	1.42	0.0450624	NM_138796	SPATA17	Spermatogenesis associated 17
10.6385	0.046389	10.1319	0.10685	1.42	0.00606924	NM_002494	NDUFC1	NADH dehydrogenase (ubiquinone) 1, subcomplex unknown, 1, 6kDa
4.49841	0.041144	3.99181	0.12336	1.42	0.00654574	NM_052838	2012-09-01	Septin 1
9.17832	0.119598	8.67173	0.049005	1.42	0.0495572	NM_001142556	HMMR	Hyaluronan-mediated motility receptor (RHAMM)
8.78378	0.031177	8.27728	0.12166	1.42	0.00451209	NM_001236	CBR3	Carbonyl reductase 3
2.78306	0.078639	2.27657	0.002765	1.42	0.0127123	ENST00000390844	-	ncrna:snRNA chromosome:NCBI36:3:197552877:197552983:-1 gene:ENSG00000212146
11.3724	0.044347	10.868	0.0659	1.42	0.00291787	NM_001150	ANPEP	Alanyl (membrane) aminopeptidase
7.75502	0.065605	7.25061	0.078365	1.42	0.00997668	NM_199044	NSUN4	NOL1/NOP2/Sun domain family, member 4
7.47157	0.061497	6.96785	0.04438	1.42	0.00634887	NM_001123385	BCOR	BCL6 co-repressor
10.225	0.102286	9.72161	0.007175	1.42	0.0305133	NM_001281	TBCB	Tubulin folding cofactor B
2.9257	0.090798	2.42285	0.059515	1.42	0.0234467	ENST00000363154	-	ncrna:misc_RNA chromosome:NCBI36:4:88884128:88884229:-1 gene:ENSG00000200024
5.22693	0.08076	4.72439	0.01952	1.42	0.0145132	NM_198697	KRTAP12-3	Keratin associated protein 12-3
6.08989	0.066805	5.58793	0.07895	1.42	0.0107272	ENST00000364740	-	ncrna:rRNA chromosome:NCBI36:2:11574974:11575080:1 gene:ENSG00000201610
5.59926	0.040708	5.09818	0.06428	1.42	0.00231705	NM_031309	SCRT1	Scratch homolog 1, zinc finger protein (Drosophila)
8.23367	0.057393	7.73273	0.123845	1.42	0.0120031	NM_001010891	MTX3	Metaxin 3
6.76991	0.048508	6.27046	0.050955	1.41	0.00322847	NM_001005291	SREBF1	Sterol regulatory element binding transcription factor 1
2.32237	0.095116	1.82363	0.168065	1.41	0.0471051	NM_001105580	GABRR3	Gamma-aminobutyric acid (GABA) receptor, rho 3
7.77322	0.055489	7.27449	0.049915	1.41	0.00491366	NR_004380	-	small nucleolar RNA, C/D box 104
3.9148	0.088618	3.41616	0.069345	1.41	0.0233076	NM_016300	ARPP-21	Cyclic AMP-regulated phosphoprotein, 21 kD
8.60062	0.054705	8.10258	0.005845	1.41	0.00373547	NM_001693	ATP6V1B2	ATPase, H+ transporting, lysosomal 56/58kDa, V1 subunit B2
8.94776	0.022386	8.45004	0.005945	1.41	0.000123436	NM_198949	NUDT1	Nudix (nucleoside diphosphate linked moiety X)-type motif 1
7.34726	0.079356	6.84975	0.01629	1.41	0.0140889	NM_003530	HIST1H3D	Histone cluster 1, H3d
7.82435	0.07859	7.32724	0.00433	1.41	0.013523	NM_007150	ZNF185	Zinc finger protein 185 (LIM domain)
11.4092	0.0489	10.9124	0.0268	1.41	0.00271589	NM_001694	ATP6V0C	ATPase, H+ transporting, lysosomal 16kDa, V0 subunit c
3.29171	0.034834	2.79499	0.15405	1.41	0.00998515	AF143882	-	Homo sapiens clone IMAGE:121214 mRNA sequence.
9.22419	0.043102	8.72885	0.00158	1.41	0.00156074	NM_018154	ASF1B	ASF1 anti-silencing function 1 homolog B (S. cerevisiae)
3.89724	0.081839	3.40225	0.11983	1.41	0.0257931	NM_001004485	OR13F1	Olfactory receptor, family 13, subfamily F, member 1
4.95574	0.041197	4.46093	0.15436	1.41	0.0118615	AK056230	LOC285943	Hypothetical protein LOC285943
5.63825	0.058789	5.14368	0.095095	1.41	0.00944823	NM_001040153	SLAIN1	SLAIN motif family, member 1
7.04035	0.044674	6.54645	0.024595	1.41	0.00198135	NM_020319	ANKMY2	Ankyrin repeat and MYND domain containing 2
7.44199	0.06877	6.94817	0.206505	1.41	0.0389359	NM_024316	LENG1	Leukocyte receptor cluster (LRC) member 1
7.14545	0.080329	6.65173	0.00481	1.41	0.014899	NM_003864	SAP30	Sin3A-associated protein, 30kDa
9.74119	0.046772	9.24789	0.099555	1.41	0.00605646	NR_024163	-	CDC28 protein kinase regulatory subunit 1B
8.63884	0.036692	8.14557	0.00698	1.41	0.000867416	NM_000344	SMN1	Survival of motor neuron 1, telomeric
8.37648	0.021431	7.88323	0.006225	1.41	0.000108178	NM_021824	NIF3L1	NIF3 NGG1 interacting factor 3-like 1 (S. pombe)
8.22244	0.06023	7.7294	0.070035	1.41	0.00787247	NM_016930	STX18	Syntaxin 18
5.62688	0.027925	5.13389	0.095215	1.41	0.00235554	BC027448	-	Homo sapiens cDNA clone IMAGE:5111296.
2.34276	0.098408	1.84982	0.04549	1.41	0.0304566	ENST00000364200	-	ncrna:snRNA chromosome:NCBI36:2:98765305:98765443:1 gene:ENSG00000201070
5.02029	0.093734	4.5275	0.15825	1.41	0.0447513	NM_001127899	CLCN5	Chloride channel 5
4.55196	0.102704	4.06006	0.03996	1.41	0.0343991	ENST00000384620	-	ncrna:snRNA chromosome:NCBI36:2:88495532:88495638:-1 gene:ENSG00000207350
6.16467	0.078403	5.67312	0.046215	1.41	0.0153027	NM_017848	FAM120C	Family with sequence similarity 120C
10.6566	0.009825	10.166	0.02665	1.41	2.38857e-05	NM_003753	EIF3D	Eukaryotic translation initiation factor 3, subunit D
3.19997	0.053677	2.71014	0.12941	1.4	0.012293	AY204749	NCRNA00114	Non-protein coding RNA 114
7.60818	0.046822	7.11882	0.06156	1.4	0.00356887	NM_032883	TOX2	TOX high mobility group box family member 2
7.62852	0.013604	7.13922	0.09062	1.4	0.00116361	NM_014646	LPIN2	Lipin 2
7.68233	0.040439	7.19329	0.021935	1.4	0.00140792	NM_020175	DUS3L	Dihydrouridine synthase 3-like (S. cerevisiae)
3.32943	0.081614	2.84097	0.134345	1.4	0.0296084	NM_003585	DOC2B	Double C2-like domains, beta
4.68313	0.039778	4.1948	0.15668	1.4	0.0124279	NM_014861	ATP2C2	ATPase, Ca++ transporting, type 2C, member 2
6.33066	0.07962	5.84243	0.10828	1.4	0.0232896	NM_003527	HIST1H2BO	Histone cluster 1, H2bo
7.70731	0.066379	7.22099	0.07085	1.4	0.01101	NM_175039	ST6GALNAC4	ST6 (alpha-N-acetyl-neuraminyl-2,3-beta-galactosyl-1,3)-N-acetylgalactosaminide alpha-2,6-sialyltransferase 4
3.56123	0.048638	3.0755	0.16983	1.4	0.0187218	NM_152623	CDC20B	Cell division cycle 20 homolog B (S. cerevisiae)
8.94204	0.028708	8.45663	0.05076	1.4	0.000795232	NM_015292	FAM62A	Family with sequence similarity 62 (C2 domain containing), member A
8.06817	0.041489	7.58365	0.03376	1.4	0.00178924	NM_015386	COG4	Component of oligomeric golgi complex 4
6.34933	0.110041	5.86552	0.0306	1.4	0.0435735	NM_153605	CRYBG3	Beta-gamma crystallin domain containing 3
6.67462	0.105941	6.19085	0.002675	1.4	0.0382483	ENST00000385558	-	ncrna:rRNA_pseudogene chromosome:NCBI36:7:148112330:148112418:-1 gene:ENSG00000208293
5.6284	0.083453	5.14539	0.08755	1.4	0.0238651	NM_080653	ATP6V1E2	ATPase, H+ transporting, lysosomal 31kDa, V1 subunit E2
3.94226	0.058804	3.46059	0.128185	1.4	0.015107	NR_002780	-	HIG1 hypoxia inducible domain family, member 2B (pseudogene)
8.46624	0.039393	7.98578	0.019515	1.4	0.00134307	NM_000344	SMN1	Survival of motor neuron 1, telomeric
8.46624	0.039393	7.98578	0.019515	1.4	0.00134307	NM_000344	SMN1	Survival of motor neuron 1, telomeric
11.4771	0.062442	10.9968	0.01085	1.4	0.0069058	NM_002281	KRT81	Keratin 81
7.77187	0.042004	7.29183	0.031835	1.39	0.00189333	NM_001516	GTF2H3	General transcription factor IIH, polypeptide 3, 34kDa
4.77098	0.091308	4.29161	0.11281	1.39	0.0353547	ENST00000388084	-	ncrna:scRNA_pseudogene chromosome:NCBI36:8:43127276:43127351:1 gene:ENSG00000210819
9.34281	0.04344	8.86348	0.01227	1.39	0.00186487	NM_006396	SSSCA1	Sjogren syndrome/scleroderma autoantigen 1
7.15985	0.029404	6.6807	0.02896	1.39	0.000545051	NM_003946	NOL3	Nucleolar protein 3 (apoptosis repressor with CARD domain)
7.24657	0.058613	6.7681	0.04257	1.39	0.00643807	NM_001082538	TCTN1	Tectonic family member 1
4.46435	0.063955	3.98634	0.16185	1.39	0.0256901	NM_002190	IL17A	Interleukin 17A
4.4572	0.044861	3.97926	0.125185	1.39	0.0094095	NM_152282	ACPL2	Acid phosphatase-like 2
7.92659	0.044357	7.44881	0.113945	1.39	0.00773134	NM_138476	MDP-1	Magnesium-dependent phosphatase 1
8.64895	0.089413	8.17164	0.01066	1.39	0.0236996	NR_024060	-	family with sequence similarity 27, member A
7.18748	0.085694	6.71089	0.04431	1.39	0.0222035	NM_005663	WHSC2	Wolf-Hirschhorn syndrome candidate 2
6.85782	0.079079	6.38123	0.10038	1.39	0.0234324	NM_014053	FLVCR1	Feline leukemia virus subgroup C cellular receptor 1
8.02908	0.034356	7.55314	0.070755	1.39	0.0021132	NM_033224	PURB	Purine-rich element binding protein B
7.47001	0.073547	6.99422	0.10684	1.39	0.0206632	NM_175039	ST6GALNAC4	ST6 (alpha-N-acetyl-neuraminyl-2,3-beta-galactosyl-1,3)-N-acetylgalactosaminide alpha-2,6-sialyltransferase 4
9.43554	0.054038	8.95996	0.07545	1.39	0.00699567	NM_006268	DPF2	D4, zinc and double PHD fingers family 2
7.07578	0.090075	6.60039	0.015315	1.39	0.024673	NM_002595	PCTK2	PCTAIRE protein kinase 2
4.86049	0.053734	4.38517	0.07665	1.39	0.00700188	ENST00000407736	-	cdna:pseudogene chromosome:NCBI36:1:8876065:8876490:1 gene:ENSG00000183445
7.87569	0.050865	7.40079	0.017865	1.39	0.00352223	BC033660	DBF4B	DBF4 homolog B (S. cerevisiae)
7.04425	0.020481	6.56937	0.0062	1.39	0.00010533	NM_023112	OTUB2	OTU domain, ubiquitin aldehyde binding 2
7.92635	0.030002	7.45162	0.05066	1.39	0.000967437	NM_001113378	FANCI	Fanconi anemia, complementation group I
8.66586	0.052478	8.19194	0.064015	1.39	0.00573275	NM_002689	POLA2	Polymerase (DNA directed), alpha 2 (70kD subunit)
7.75461	0.012774	7.28153	0.074275	1.39	0.000662024	NM_181843	NUDT8	Nudix (nucleoside diphosphate linked moiety X)-type motif 8
8.10365	0.093313	7.63069	0.10739	1.39	0.0377221	NM_012192	DNHD1	Dynein heavy chain domain 1
5.00805	0.074608	4.53627	0.07605	1.39	0.0176601	NM_005376	MYCL1	V-myc myelocytomatosis viral oncogene homolog 1, lung carcinoma derived (avian)
4.85494	0.045011	4.38415	0.147045	1.39	0.0138841	NM_017415	KLHL3	Kelch-like 3 (Drosophila)
4.73658	0.091115	4.26598	0.149135	1.39	0.0457929	NM_005332	HBZ	Hemoglobin, zeta
8.85198	0.082063	8.38146	0.06321	1.39	0.0218408	NM_052859	RFT1	RFT1 homolog (S. cerevisiae)
6.86395	0.03709	6.3947	0.02413	1.38	0.00123246	NM_001105539	ZBTB10	Zinc finger and BTB domain containing 10
4.92938	0.06274	4.46047	0.016255	1.38	0.00773414	NM_174918	C19orf59	Chromosome 19 open reading frame 59
3.46876	0.066979	3.00012	0.07846	1.38	0.0136069	NM_001128618	C9orf57	Chromosome 9 open reading frame 57
5.43827	0.065699	4.96965	0.08129	1.38	0.0132163	XM_001133530	-	hypothetical LOC729687
7.46949	0.034694	7.00122	0.03587	1.38	0.00115602	NM_015041	CLUAP1	Clusterin associated protein 1
3.10541	0.073434	2.63826	0.036915	1.38	0.0142082	NR_004396	-	small nucleolar RNA, C/D box 1B
5.17178	0.05733	4.70472	0.202135	1.38	0.0362616	ENST00000411073	-	ncrna:misc_RNA chromosome:NCBI36:16:2003183:2003476:1 gene:ENSG00000223005
4.4873	0.069896	4.02034	0.08695	1.38	0.0165237	ENST00000387797	-	ncrna:snRNA_pseudogene chromosome:NCBI36:10:87399836:87399990:-1 gene:ENSG00000210532
9.03153	0.063793	8.56485	0.090855	1.38	0.0135202	NM_017916	PIH1D1	PIH1 domain containing 1
11.115	0.04131	10.6484	0.0006	1.38	0.00166601	NM_003542	HIST1H4C	Histone cluster 1, H4c
4.60027	0.056491	4.13372	0.1215	1.38	0.0144075	AK094424	-	hypothetical LOC100130924
6.70859	0.089058	6.24387	0.06371	1.38	0.028856	NM_002335	LRP5	Low density lipoprotein receptor-related protein 5
8.1903	0.023497	7.72758	0.0649	1.38	0.000956497	NM_006544	EXOC5	Exocyst complex component 5
7.85417	0.036195	7.3919	0.02029	1.38	0.0011508	NM_015411	SUMF2	Sulfatase modifying factor 2
8.50252	0.0591	8.04061	0.01159	1.38	0.00654395	NM_005273	GNB2	Guanine nucleotide binding protein (G protein), beta polypeptide 2
2.79277	0.085138	2.3311	0.09106	1.38	0.02957	NM_001764	CD1B	CD1b molecule
8.87989	0.061851	8.41837	0.05584	1.38	0.00953532	NM_007317	KIF22	Kinesin family member 22
5.04967	0.104183	4.58882	0.013685	1.38	0.0421893	NM_181624	KRTAP23-1	Keratin associated protein 23-1
6.69171	0.095837	6.23107	0.04516	1.38	0.0346261	NM_006617	NES	Nestin
4.71233	0.104237	4.25173	0.00744	1.38	0.0421962	NM_002773	PRSS8	Protease, serine, 8
7.83651	0.068363	7.37735	0.16042	1.37	0.0318733	NM_152540	SCFD2	Sec1 family domain containing 2
8.0726	0.023923	7.61411	0.06551	1.37	0.00104198	NM_015017	USP33	Ubiquitin specific peptidase 33
8.63694	0.092258	8.17904	0.018305	1.37	0.0299875	NR_024060	-	family with sequence similarity 27, member A
8.77839	0.072715	8.32063	0.068595	1.37	0.0173005	NM_005949	MT1F	Metallothionein 1F
8.41775	0.060328	7.96044	0.08534	1.37	0.0119096	NM_005850	SF3B4	Splicing factor 3b, subunit 4, 49kDa
9.85614	0.037905	9.39973	0.014775	1.37	0.00137054	NM_013995	LAMP2	Lysosomal-associated membrane protein 2
6.47049	0.091037	6.01416	0.06982	1.37	0.033247	NM_175876	EXOC8	Exocyst complex component 8
7.23669	0.052437	6.78056	0.11576	1.37	0.0125682	NM_018361	AGPAT5	1-acylglycerol-3-phosphate O-acyltransferase 5 (lysophosphatidic acid acyltransferase, epsilon)
7.46787	0.038952	7.01189	0.03384	1.37	0.00181998	NM_024103	SLC25A23	Solute carrier family 25 (mitochondrial carrier; phosphate carrier), member 23
6.4228	0.04068	5.96697	0.03973	1.37	0.00226521	NM_013399	C16orf5	Chromosome 16 open reading frame 5
5.64754	0.072441	5.19189	0.097915	1.37	0.0213633	NM_014243	ADAMTS3	ADAM metallopeptidase with thrombospondin type 1 motif, 3
4.07725	0.065065	3.62203	0.038625	1.37	0.0105535	ENST00000356642	-	hypothetical protein LOC100129858
6.50282	0.101537	6.04767	0.045565	1.37	0.0424083	NM_005391	PDK3	Pyruvate dehydrogenase kinase, isozyme 3
7.69546	0.057369	7.24072	0.04398	1.37	0.00726588	NM_003439	ZKSCAN1	Zinc finger with KRAB and SCAN domains 1
9.00992	0.042228	8.5555	0.10007	1.37	0.00671645	NM_002869	RAB6A	RAB6A, member RAS oncogene family
10.4296	0.024572	9.97527	0.025325	1.37	0.000342221	NM_052969	RPL39L	Ribosomal protein L39-like
7.96911	0.026192	7.51488	0.00247	1.37	0.000320642	NM_014049	ACAD9	Acyl-Coenzyme A dehydrogenase family, member 9
3.66356	0.077669	3.2103	0.1686	1.37	0.0436053	NR_001295	-	small nucleolar RNA, C/D box 109A
3.66356	0.077669	3.2103	0.1686	1.37	0.0436053	NR_001295	-	small nucleolar RNA, C/D box 109A
7.5619	0.058506	7.1087	0.012825	1.37	0.00677485	NM_080651	MED30	Mediator complex subunit 30
6.74257	0.03994	6.28949	0.18409	1.37	0.0238183	BC034033	C9orf41	Chromosome 9 open reading frame 41
4.20165	0.05223	3.7488	0.14004	1.37	0.017561	ENST00000404461	-	cdna:pseudogene chromosome:NCBI36:X:96988917:96990671:1 gene:ENSG00000218266
6.8364	0.08536	6.38405	0.010935	1.37	0.0242719	NM_002436	MPP1	Membrane protein, palmitoylated 1, 55kDa
7.21634	0.062617	6.76433	0.14267	1.37	0.0243677	NM_182625	GEN1	Gen homolog 1, endonuclease (Drosophila)
6.95299	0.063007	6.50157	0.110735	1.37	0.0178289	NM_001013845	CXorf40B	Chromosome X open reading frame 40B
7.66338	0.050841	7.21333	0.059915	1.37	0.00601398	NM_022154	SLC39A8	Solute carrier family 39 (zinc transporter), member 8
7.77949	0.059513	7.32984	0.034715	1.37	0.0080436	NM_004793	LONP1	Lon peptidase 1, mitochondrial
8.89645	0.026453	8.44744	0.003735	1.37	0.000349851	NM_003362	UNG	Uracil-DNA glycosylase
2.3246	0.089355	1.8757	0.042455	1.36	0.0302765	ENST00000386092	-	ncrna:tRNA_pseudogene chromosome:NCBI36:2:84939387:84939459:1 gene:ENSG00000208827
10.3402	0.025124	9.89143	0.05312	1.36	0.000838615	NM_018509	LRRC59	Leucine rich repeat containing 59
4.46747	0.061949	4.01882	0.19641	1.36	0.0418927	ENST00000410988	-	ncrna:rRNA chromosome:NCBI36:13:50499884:50499989:-1 gene:ENSG00000222920
7.80829	0.023724	7.35975	0.10158	1.36	0.00332391	NM_033084	FANCD2	Fanconi anemia, complementation group D2
8.74763	0.011709	8.29956	0.08765	1.36	0.0013663	NM_015084	MRPS27	Mitochondrial ribosomal protein S27
6.20102	0.076322	5.75298	0.04669	1.36	0.0191534	NM_152440	C12orf66	Chromosome 12 open reading frame 66
5.25274	0.031454	4.80528	0.22635	1.36	0.0378066	NM_005299	GPR31	G protein-coupled receptor 31
8.86614	0.063121	8.41891	0.05639	1.36	0.0113551	NM_007317	KIF22	Kinesin family member 22
4.40969	0.093142	3.96257	0.0436	1.36	0.0347348	NM_173802	AMN1	Antagonist of mitotic exit network 1 homolog (S. cerevisiae)
5.80905	0.046492	5.36247	0.039675	1.36	0.00377212	NM_014246	CELSR1	Cadherin, EGF LAG seven-pass G-type receptor 1 (flamingo homolog, Drosophila)
7.03666	0.064247	6.591	0.046285	1.36	0.0113639	NM_013334	GMPPB	GDP-mannose pyrophosphorylase B
5.14681	0.065	4.70204	0.04841	1.36	0.0120201	BC008001	-	Homo sapiens mRNA similar to hypothetical protein FLJ21463 (cDNA clone IMAGE:3504595).
6.37874	0.104569	5.93412	0.02609	1.36	0.0478278	NM_001031720	GSTCD	Glutathione S-transferase, C-terminal domain containing
4.00189	0.032277	3.55743	0.14583	1.36	0.0119176	ENST00000410179	-	ncrna:misc_RNA chromosome:NCBI36:5:174987797:174988108:1 gene:ENSG00000222111
2.15229	0.052373	1.70783	0.07663	1.36	0.00829706	ENST00000356030	-	cdna:pseudogene chromosome:NCBI36:X:56117482:56118739:1 gene:ENSG00000196163
2.22618	0.09073	1.78205	0.107505	1.36	0.0424835	NM_001075	UGT2B10	UDP glucuronosyltransferase 2 family, polypeptide B10
5.04258	0.066945	4.59973	0.096755	1.36	0.0191334	BC008001	-	Homo sapiens mRNA similar to hypothetical protein FLJ21463 (cDNA clone IMAGE:3504595).
4.68775	0.055307	4.24491	0.12579	1.36	0.0173682	ENST00000410552	-	ncrna:misc_RNA chromosome:NCBI36:2:24073171:24073459:-1 gene:ENSG00000222484
4.44005	0.070093	3.99724	0.00955	1.36	0.0136393	NM_032588	TRIM63	Tripartite motif-containing 63
4.48241	0.056553	4.03972	0.050715	1.36	0.00804083	NM_004887	CXCL14	Chemokine (C-X-C motif) ligand 14
7.58122	0.078351	7.1388	0.148	1.36	0.0406995	NR_002742	-	small nucleolar RNA, C/D box 52
6.35494	0.069143	5.91431	0.08774	1.36	0.019564	NM_019850	NGEF	Neuronal guanine nucleotide exchange factor
9.34001	0.037122	8.89947	0.05208	1.36	0.00235748	NM_016418	NF2	Neurofibromin 2 (merlin)
7.70011	0.057088	7.26019	0.02034	1.36	0.00706165	NM_014021	SSX2IP	Synovial sarcoma, X breakpoint 2 interacting protein
7.84264	0.086908	7.40276	0.102755	1.36	0.038448	NR_024113	-	chromosome 1 open reading frame 52
6.89304	0.077449	6.45406	0.044835	1.36	0.0212532	NM_024817	THSD4	Thrombospondin, type I, domain containing 4
3.20373	0.098458	2.76552	0.012145	1.35	0.0414131	NM_001559	IL12RB2	Interleukin 12 receptor, beta 2
8.15324	0.027715	7.71586	0.00317	1.35	0.000463512	NM_004792	PPIG	Peptidylprolyl isomerase G (cyclophilin G)
11.0704	0.030709	10.6334	0.06945	1.35	0.00222534	NM_003517	HIST2H2AC	Histone cluster 2, H2ac
8.05387	0.04477	7.61697	0.069275	1.35	0.00532679	NM_004798	KIF3B	Kinesin family member 3B
5.6206	0.026536	5.18372	0.02898	1.35	0.000556696	NM_004443	EPHB3	EPH receptor B3
8.11411	0.032614	7.67753	0.03949	1.35	0.00132379	NM_001042371	PGP	Phosphoglycolate phosphatase
9.94037	0.060356	9.50408	0.046035	1.35	0.010022	NM_001280	CIRBP	Cold inducible RNA binding protein
10.1313	0.046352	9.6953	0.04895	1.35	0.00451222	NM_198066	GNPNAT1	Glucosamine-phosphate N-acetyltransferase 1
8.29512	0.088937	7.85933	0.03665	1.35	0.0322384	NM_001662	ARF5	ADP-ribosylation factor 5
7.11278	0.020088	6.67703	0.02114	1.35	0.000185442	NM_014654	SDC3	Syndecan 3
7.85829	0.066211	7.42256	0.153645	1.35	0.0333764	NM_212554	METTL10	Methyltransferase like 10
7.78211	0.038609	7.34652	0.070795	1.35	0.00383275	NM_016205	PDGFC	Platelet derived growth factor C
10.6991	0.024341	10.2636	0.00395	1.35	0.000285319	NM_181802	UBE2C	Ubiquitin-conjugating enzyme E2C
9.01024	0.056657	8.57498	0.053055	1.35	0.00875047	NM_015343	DULLARD	Dullard homolog (Xenopus laevis)
6.23127	0.055973	5.79666	0.078255	1.35	0.010858	NM_007182	RASSF1	Ras association (RalGDS/AF-6) domain family member 1
7.93177	0.053725	7.49723	0.013255	1.35	0.00582678	NM_001145316	DSN1	DSN1, MIND kinetochore complex component, homolog (S. cerevisiae)
5.14394	0.097142	4.70979	0.013035	1.35	0.0409382	NM_004527	MEOX1	Mesenchyme homeobox 1
3.97745	0.044929	3.54352	0.038435	1.35	0.00370122	ENST00000364758	-	ncrna:snRNA chromosome:NCBI36:6:150689452:150689592:-1 gene:ENSG00000201628
8.39841	0.033017	7.96462	0.032815	1.35	0.00125309	NM_018358	ABCF3	ATP-binding cassette, sub-family F (GCN20), member 3
5.29831	0.098428	4.86512	0.008425	1.35	0.0427184	ENST00000384670	-	ncrna:misc_RNA chromosome:NCBI36:9:112736507:112736608:1 gene:ENSG00000207401
7.66915	0.023701	7.23637	0.10273	1.35	0.00390822	NM_003940	USP13	Ubiquitin specific peptidase 13 (isopeptidase T-3)
6.14947	0.055521	5.71685	0.025485	1.35	0.00695432	NM_001875	CPS1	Carbamoyl-phosphate synthetase 1, mitochondrial
3.45839	0.093035	3.02596	0.01349	1.35	0.0364585	NM_006078	CACNG2	Calcium channel, voltage-dependent, gamma subunit 2
6.27295	0.048376	5.84122	0.17623	1.35	0.0293835	NM_003514	HIST1H2AM	Histone cluster 1, H2am
9.02336	0.067439	8.59216	0.05478	1.35	0.0155275	NR_004390	METTL12	Methyltransferase like 12
5.09076	0.052211	4.65977	0.013225	1.35	0.00541974	NM_001122853	MYOZ3	Myozenin 3
6.37475	0.085797	5.94376	0.017665	1.35	0.0289116	NM_017676	GIN1	Gypsy retrotransposon integrase 1
8.31338	0.039705	7.88258	0.03992	1.35	0.0025941	NM_020746	MAVS	Mitochondrial antiviral signaling protein
4.10255	0.021704	3.67194	0.21277	1.35	0.0327019	NR_024630	-	chromosome 14 open reading frame 162
8.81021	0.047591	8.37994	0.04348	1.35	0.00484212	NM_001823	CKB	Creatine kinase, brain
8.86593	0.037165	8.4359	0.07117	1.35	0.00370489	NM_004336	BUB1	Budding uninhibited by benzimidazoles 1 homolog (yeast)
3.51696	0.031687	3.08697	0.084235	1.35	0.00358813	BC137511	C8orf86	Chromosome 8 open reading frame 86
9.88853	0.058446	9.4588	0.019385	1.35	0.00829458	NM_015975	TAF9B	TAF9B RNA polymerase II, TATA box binding protein (TBP)-associated factor, 31kDa
9.88853	0.058446	9.4588	0.019385	1.35	0.00829458	NM_015975	TAF9B	TAF9B RNA polymerase II, TATA box binding protein (TBP)-associated factor, 31kDa
7.51416	0.038355	7.08499	0.11369	1.35	0.00895879	NM_194292	SASS6	Spindle assembly 6 homolog (C. elegans)
3.85097	0.04323	3.42199	0.06222	1.35	0.00467059	ENST00000331505	-	RIMS binding protein 3C
6.97931	0.049502	6.55068	0.080175	1.35	0.00855255	NM_015332	NUDCD3	NudC domain containing 3
3.11912	0.057583	2.6908	0.083055	1.35	0.0129179	NM_002176	IFNB1	Interferon, beta 1, fibroblast
6.32988	0.042344	5.90209	0.03092	1.35	0.00296621	NM_139072	DNER	Delta/notch-like EGF repeat containing
2.5256	0.093256	2.09824	0.04218	1.34	0.0397743	ENST00000385765	-	ncrna:snoRNA_pseudogene chromosome:NCBI36:3:176939753:176939856:1 gene:ENSG00000208500
9.00816	0.025647	8.58082	0.00697	1.34	0.00038268	NM_018944	C21orf45	Chromosome 21 open reading frame 45
8.23931	0.050507	7.81248	0.05978	1.34	0.00711645	NM_033540	MFN1	Mitofusin 1
8.05167	0.075713	7.62495	0.0394	1.34	0.021292	NM_138288	C14orf147	Chromosome 14 open reading frame 147
8.21581	0.064925	7.78909	0.055825	1.34	0.0144436	NM_014089	NUPL1	Nucleoporin like 1
9.55227	0.058129	9.12595	0.08877	1.34	0.0142708	NM_015953	NOSIP	Nitric oxide synthase interacting protein
7.9816	0.040398	7.55539	0.009155	1.34	0.002188	NM_007221	PMF1	Polyamine-modulated factor 1
8.72523	0.033654	8.30018	0.00961	1.34	0.00111766	NM_153339	PUSL1	Pseudouridylate synthase-like 1
3.99802	0.053348	3.57312	0.06265	1.34	0.00872474	NM_199351	ILDR2	Immunoglobulin-like domain containing receptor 2
7.14566	0.078245	6.72124	0.0003	1.34	0.0224331	NM_022353	ANKAR	Ankyrin and armadillo repeat containing
8.69283	0.031473	8.26859	0.01082	1.34	0.000881177	NM_002967	SAFB	Scaffold attachment factor B
3.62249	0.07187	3.19833	0.1704	1.34	0.0474861	ENST00000391043	-	ncrna:snRNA chromosome:NCBI36:12:9667985:9668091:-1 gene:ENSG00000212345
6.47079	0.014172	6.04672	0.13634	1.34	0.00791728	NM_004932	CDH6	Cadherin 6, type 2, K-cadherin (fetal kidney)
9.01992	0.038522	8.59633	0.000125	1.34	0.00184304	NM_145080	NSMCE1	Non-SMC element 1 homolog (S. cerevisiae)
3.86239	0.07915	3.43932	0.034575	1.34	0.0247139	ENST00000386828	-	ncrna:snoRNA_pseudogene chromosome:NCBI36:13:40652119:40652223:-1 gene:ENSG00000209563
3.22781	0.095923	2.8048	0.009305	1.34	0.0424907	ENST00000411041	-	ncrna:snRNA chromosome:NCBI36:9:2152763:2152953:-1 gene:ENSG00000222973
8.16206	0.038918	7.73925	0.14622	1.34	0.0167396	NM_018047	RBM22	RNA binding motif protein 22
5.53369	0.036944	5.111	0.02474	1.34	0.0018177	NM_138378	FDXACB1	Ferredoxin-fold anticodon binding domain containing 1
6.32135	0.052291	5.89879	0.1062	1.34	0.0142926	NM_003105	SORL1	Sortilin-related receptor, L(DLR class) A repeats-containing
9.04131	0.030545	8.61956	0.056675	1.34	0.0018366	NM_005242	F2RL1	Coagulation factor II (thrombin) receptor-like 1
3.80489	0.060118	3.3835	0.059515	1.34	0.0123262	BC066975	C3orf25	Chromosome 3 open reading frame 25
4.44328	0.050352	4.02244	0.00117	1.34	0.00508436	ENST00000338197	-	chromosome X open reading frame 25
8.85194	0.032778	8.43126	0.031135	1.34	0.00133817	NM_000317	PTS	6-pyruvoyltetrahydropterin synthase
5.83964	0.045494	5.41944	0.203595	1.34	0.0416989	AF355799	DEFT1P	Defensin, theta 1 pseudogene
5.83964	0.045494	5.41944	0.203595	1.34	0.0416989	AF355799	DEFT1P	Defensin, theta 1 pseudogene
7.54383	0.074976	7.12364	0.03182	1.34	0.0211782	NM_001122	ADFP	Adipose differentiation-related protein
5.59468	0.054447	5.17482	0.07224	1.34	0.0106551	NM_181686	KRTAP12-1	Keratin associated protein 12-1
4.91262	0.022021	4.49293	0.22317	1.34	0.0405376	NM_014858	TMCC2	Transmembrane and coiled-coil domain family 2
3.07897	0.085001	2.65934	0.009355	1.34	0.0302759	NM_001024601	C1orf227	Chromosome 1 open reading frame 227
7.51813	0.044827	7.09867	0.08522	1.34	0.00788351	NM_001080449	DNA2	DNA replication helicase 2 homolog (yeast)
2.57177	0.088452	2.15244	0.04217	1.34	0.0361419	NM_183061	SLC9A10	Solute carrier family 9, member 10
8.26498	0.043552	7.84568	0.00561	1.34	0.00304413	AK301230	ZNF724P	Zinc finger protein 724 pseudogene
5.77293	0.070143	5.35372	0.109555	1.34	0.0283186	NM_017996	DET1	De-etiolated homolog 1 (Arabidopsis)
8.60206	0.080794	8.18286	0.0222	1.34	0.0263552	NR_027421	-	family with sequence similarity 27, member C
6.70156	0.055401	6.28275	0.000455	1.34	0.00728372	NM_024652	LRRK1	Leucine-rich repeat kinase 1
7.952	0.040553	7.53377	0.03849	1.34	0.00304163	NM_002540	ODF2	Outer dense fiber of sperm tails 2
9.6387	0.021028	9.22073	0.10896	1.34	0.00479309	NM_007086	WDHD1	WD repeat and HMG-box DNA binding protein 1
7.09783	0.067919	6.67999	0.008005	1.34	0.0148933	NM_001001484	PTER	Phosphotriesterase related
6.81911	0.05809	6.40165	0.194815	1.34	0.0475465	NM_012160	FBXL4	F-box and leucine-rich repeat protein 4
4.81424	0.044994	4.39687	0.177075	1.34	0.0308555	ENST00000385978	-	ncrna:scRNA_pseudogene chromosome:NCBI36:3:154334698:154335000:-1 gene:ENSG00000208713
3.01101	0.030629	2.59438	0.05669	1.33	0.00193643	NM_001004329	DBX2	Developing brain homeobox 2
8.78766	0.045125	8.37121	0.15705	1.33	0.0239899	NM_003509	HIST1H2AI	Histone cluster 1, H2ai
8.5262	0.044328	8.10993	0.02071	1.33	0.00354702	NM_016309	LCMT1	Leucine carboxyl methyltransferase 1
6.36095	0.077692	5.94479	0.06235	1.33	0.0274417	NM_003427	ZNF76	Zinc finger protein 76 (expressed in testis)
8.97549	0.067904	8.55941	0.04142	1.33	0.0166236	NM_024640	YRDC	YrdC domain containing (E. coli)
5.82049	0.07319	5.40444	0.003035	1.33	0.0192828	NM_014548	TMOD2	Tropomodulin 2 (neuronal)
9.70957	0.053874	9.29358	0.048385	1.33	0.00844214	NM_018098	ECT2	Epithelial cell transforming sequence 2 oncogene
2.74899	0.081078	2.33333	0.093535	1.33	0.0365034	ENST00000365603	-	ncrna:misc_RNA chromosome:NCBI36:X:142005799:142006129:1 gene:ENSG00000202473
10.3371	0.016378	9.9217	0.04492	1.33	0.000353842	NM_016732	RALY	RNA binding protein, autoantigenic (hnRNP-associated with lethal yellow homolog (mouse))
4.2514	0.065306	3.83635	0.025345	1.33	0.0138646	NM_001134734	C1orf94	Chromosome 1 open reading frame 94
7.53841	0.023945	7.12375	0.085675	1.33	0.00285436	NM_012156	EPB41L1	Erythrocyte membrane protein band 4.1-like 1
6.53455	0.032595	6.12	0.030735	1.33	0.00138034	NM_001915	CYB561	Cytochrome b-561
8.59318	0.039499	8.17867	0.097495	1.33	0.00788369	NM_004704	RRP9	Ribosomal RNA processing 9, small subunit (SSU) processome component, homolog (yeast)
8.77059	0.02516	8.35614	0.078505	1.33	0.00246875	NM_017739	POMGNT1	Protein O-linked mannose beta1,2-N-acetylglucosaminyltransferase
10.0083	0.093238	9.59416	0.05402	1.33	0.0449332	NM_005328	HAS2	Hyaluronan synthase 2
7.36693	0.058024	6.95334	0.101295	1.33	0.0179982	NM_003842	TNFRSF10B	Tumor necrosis factor receptor superfamily, member 10b
8.62256	0.034749	8.2091	0.09953	1.33	0.00671878	NM_015341	NCAPH	Non-SMC condensin I complex, subunit H
7.49819	0.010024	7.08557	0.034	1.33	8.77767e-05	NM_004589	SCO1	SCO cytochrome oxidase deficient homolog 1 (yeast)
4.38309	0.092633	3.97062	0.082355	1.33	0.0492917	NR_002589	-	small nucleolar RNA, C/D box 51
7.73498	0.074816	7.32289	0.10193	1.33	0.0326176	NM_002957	RXRA	Retinoid X receptor, alpha
7.34424	0.073535	6.9322	0.06036	1.33	0.0239713	NM_004628	XPC	Xeroderma pigmentosum, complementation group C
9.31125	0.047889	8.90015	0.05575	1.33	0.00665678	NM_001923	DDB1	Damage-specific DNA binding protein 1, 127kDa
8.13542	0.052739	7.72456	0.06649	1.33	0.00989656	NM_015477	SIN3A	SIN3 homolog A, transcription regulator (yeast)
6.66354	0.03218	6.25271	0.08577	1.33	0.00450922	NM_001570	IRAK2	Interleukin-1 receptor-associated kinase 2
9.0243	0.025656	8.61361	0.017955	1.33	0.000508597	NM_025233	COASY	Coenzyme A synthase
5.79534	0.048636	5.38568	0.083655	1.33	0.0100657	ENST00000410973	-	ncrna:misc_RNA chromosome:NCBI36:17:41752812:41753090:1 gene:ENSG00000222905
5.79534	0.048636	5.38568	0.083655	1.33	0.0100657	ENST00000410973	-	ncrna:misc_RNA chromosome:NCBI36:17:41752812:41753090:1 gene:ENSG00000222905
4.06968	0.048635	3.66027	0.02246	1.33	0.00527658	NM_031891	CDH20	Cadherin 20, type 2
9.50365	0.054405	9.09478	0.042895	1.33	0.00884575	NM_013277	RACGAP1	Rac GTPase activating protein 1
6.17328	0.09354	5.76457	0.0038	1.33	0.0435704	NM_003975	SH2D2A	SH2 domain protein 2A
8.64157	0.029494	8.23292	0.12245	1.33	0.00935164	ENST00000363823	-	ncrna:snoRNA chromosome:NCBI36:14:63187768:63187970:-1 gene:ENSG00000200693
6.62804	0.050014	6.21941	0.029455	1.33	0.00610431	NM_175907	ZADH2	Zinc binding alcohol dehydrogenase domain containing 2
2.96921	0.028091	2.5606	0.037325	1.33	0.00103941	NM_003476	CSRP3	Cysteine and glycine-rich protein 3 (cardiac LIM protein)
10.2184	0.049165	9.8102	0.062895	1.33	0.00800722	NM_000485	APRT	Adenine phosphoribosyltransferase
8.00653	0.059826	7.59878	0.00971	1.33	0.0105465	NM_015658	NOC2L	Nucleolar complex associated 2 homolog (S. cerevisiae)
8.31632	0.029398	7.90872	0.130665	1.33	0.0111491	NM_032336	GINS4	GINS complex subunit 4 (Sld5 homolog)
8.57506	0.091409	8.16797	0.04588	1.33	0.0437412	NM_012154	EIF2C2	Eukaryotic translation initiation factor 2C, 2
10.923	0.014981	10.516	0.01405	1.33	7.16067e-05	NM_006827	TMED10	Transmembrane emp24-like trafficking protein 10 (yeast)
7.42129	0.059918	7.01438	0.03571	1.33	0.0116994	NM_018387	STRBP	Spermatid perinuclear RNA binding protein
7.37604	0.019121	6.96914	0.09636	1.33	0.00343807	NM_133436	ASNS	Asparagine synthetase
8.82501	0.039814	8.41858	0.066495	1.33	0.00491891	NM_002857	PEX19	Peroxisomal biogenesis factor 19
3.97985	0.058607	3.57381	0.035785	1.33	0.0109756	NM_015576	ERC2	ELKS/RAB6-interacting/CAST family member 2
6.71626	0.084388	6.3103	0.060105	1.32	0.0369497	NM_030791	SGPP1	Sphingosine-1-phosphate phosphatase 1
7.43004	0.022715	7.02438	0.04649	1.32	0.000796399	NM_004388	CTBS	Chitobiase, di-N-acetyl-
8.81781	0.026906	8.41219	0.01675	1.32	0.000622178	NM_003559	PIP4K2B	Phosphatidylinositol-5-phosphate 4-kinase, type II, beta
4.6574	0.032649	4.25183	0.018215	1.32	0.00127806	ENST00000364488	-	ncrna:misc_RNA chromosome:NCBI36:14:49605036:49605358:1 gene:ENSG00000201358
8.65433	0.049541	8.24884	0.05732	1.32	0.00785106	BC005102	C1orf57	Chromosome 1 open reading frame 57
7.95411	0.016231	7.54878	0.046085	1.32	0.000405802	NM_020782	KLHDC5	Kelch domain containing 5
9.38983	0.034398	8.98471	0.008595	1.32	0.00144987	NM_014230	SRP68	Signal recognition particle 68kDa
5.66575	0.091489	5.26077	0.0533	1.32	0.0454231	NM_033413	LRRC46	Leucine rich repeat containing 46
5.76614	0.08761	5.36261	0.01425	1.32	0.0375154	NM_006991	ZNF197	Zinc finger protein 197
6.7923	0.061758	6.39029	0.06726	1.32	0.0166042	NM_018994	FBXO42	F-box protein 42
8.47988	0.033922	8.07832	0.00617	1.32	0.00140891	NM_015399	BRMS1	Breast cancer metastasis suppressor 1
7.53681	0.031314	7.13583	0.10542	1.32	0.00737238	NM_058190	C21orf70	Chromosome 21 open reading frame 70
6.38338	0.035504	5.98268	0.073955	1.32	0.00458775	NM_021648	TSPYL4	TSPY-like 4
5.18166	0.035115	4.7813	0.085315	1.32	0.00570541	NM_006399	BATF	Basic leucine zipper transcription factor, ATF-like
8.24264	0.045447	7.84279	0.09753	1.32	0.011585	NM_018999	KIAA1128	KIAA1128
3.50915	0.093782	3.10979	0.01774	1.32	0.0473192	ENST00000387720	-	ncrna:scRNA_pseudogene chromosome:NCBI36:20:37414910:37415048:1 gene:ENSG00000210455
8.91948	0.031004	8.52019	0.03274	1.32	0.00139932	NM_004631	LRP8	Low density lipoprotein receptor-related protein 8, apolipoprotein e receptor
9.99878	0.013045	9.59972	0.0175	1.32	5.74098e-05	NM_006430	CCT4	Chaperonin containing TCP1, subunit 4 (delta)
7.15627	0.082786	6.75731	0.06972	1.32	0.0384678	NM_004408	DNM1	Dynamin 1
6.59476	0.013153	6.19593	0.0725	1.32	0.00119992	NM_153690	FAM43A	Family with sequence similarity 43, member A
3.81186	0.060638	3.41321	0.051895	1.32	0.0144048	ENST00000384522	-	ncrna:misc_RNA chromosome:NCBI36:11:24434033:24434132:1 gene:ENSG00000207252
9.51759	0.012651	9.11942	0.057755	1.32	0.000579642	NM_014632	MICAL2	Microtubule associated monoxygenase, calponin and LIM domain containing 2
9.02547	0.072807	8.62735	0.085535	1.32	0.0303047	NM_004814	SNRNP40	Small nuclear ribonucleoprotein 40kDa (U5)
11.4028	0.053113	11.0058	0.03915	1.32	0.00882716	NM_021018	HIST1H3F	Histone cluster 1, H3f
9.13928	0.049564	8.74226	0.010375	1.32	0.00600272	NM_005916	MCM7	Minichromosome maintenance complex component 7
2.42778	0.038861	2.03102	0.026105	1.32	0.00278663	ENST00000363470	-	ncrna:snRNA chromosome:NCBI36:6:47899085:47899245:1 gene:ENSG00000200340
6.66205	0.030424	6.26555	0.051715	1.32	0.00203707	NR_024060	-	family with sequence similarity 27, member A
4.90121	0.036675	4.50488	0.09804	1.32	0.00823694	NM_001099676	C12orf56	Chromosome 12 open reading frame 56
8.27729	0.0566	7.88112	0.07082	1.32	0.014196	NM_001079673	FNDC3A	Fibronectin type III domain containing 3A
4.4397	0.071195	4.0439	0.009675	1.32	0.0208249	NM_201402	DUB3	Deubiquitinating enzyme 3
9.42066	0.021204	9.02557	0.090695	1.32	0.00349693	NM_016183	MRTO4	MRNA turnover 4 homolog (S. cerevisiae)
4.5569	0.085584	4.16183	0.03251	1.32	0.038361	NM_000166	GJB1	Gap junction protein, beta 1, 32kDa
9.13776	0.083403	8.74303	0.08512	1.31	0.0435676	NM_001237	CCNA2	Cyclin A2
3.73827	0.061759	3.34355	0.01896	1.31	0.0133937	NM_004352	CBLN1	Cerebellin 1 precursor
9.25865	0.062026	8.86496	0.028905	1.31	0.0141798	NM_014740	EIF4A3	Eukaryotic translation initiation factor 4A, isoform 3
4.4616	0.053355	4.06816	0.164245	1.31	0.0376248	NM_001003443	OR56A3	Olfactory receptor, family 56, subfamily A, member 3
5.51936	0.035074	5.12606	0.05619	1.31	0.00332896	NM_144720	JAKMIP1	Janus kinase and microtubule interacting protein 1
6.30736	0.07419	5.91426	0.11807	1.31	0.0414671	AK055432	MORN1	MORN repeat containing 1
9.44316	0.03303	9.05025	0.087365	1.31	0.00573593	NM_030919	FAM83D	Family with sequence similarity 83, member D
6.54744	0.076897	6.15456	0.110575	1.31	0.0425035	NM_003256	TIMP4	TIMP metallopeptidase inhibitor 4
8.114	0.06965	7.72136	0.00418	1.31	0.0198249	NM_005250	FOXL1	Forkhead box L1
6.6353	0.034396	6.24285	0.10874	1.31	0.00959771	NM_002693	POLG	Polymerase (DNA directed), gamma
5.33695	0.068159	4.9447	0.057685	1.31	0.0222348	ENST00000364105	-	ncrna:snRNA chromosome:NCBI36:1:8189081:8189244:-1 gene:ENSG00000200975
4.57152	0.075964	4.17941	0.08803	1.31	0.035849	ENST00000410466	-	ncrna:snRNA chromosome:NCBI36:15:41682033:41682138:1 gene:ENSG00000222398
3.89857	0.05423	3.50646	0.04934	1.31	0.0106695	NM_000125	ESR1	Estrogen receptor 1
9.58286	0.084141	9.19088	0.020105	1.31	0.0365346	NM_002284	KRT86	Keratin 86
6.42976	0.039937	6.03815	0.03588	1.31	0.00357316	NM_022039	FBXW4	F-box and WD repeat domain containing 4
8.5598	0.041477	8.16865	0.09402	1.31	0.00992316	NM_007189	ABCF2	ATP-binding cassette, sub-family F (GCN20), member 2
7.99794	0.050765	7.60686	0.099775	1.31	0.0160534	NM_130398	EXO1	Exonuclease 1
6.22901	0.042314	5.83801	0.04002	1.31	0.00454484	NM_006562	LBX1	Ladybird homeobox 1
5.96326	0.020254	5.57256	0.020395	1.31	0.000286151	NR_002826	-	nucleolar complex associated 2 homolog (S. cerevisiae) pseudogene
2.88138	0.079241	2.491	0.083835	1.31	0.0393532	AF090921	C9orf38	Chromosome 9 open reading frame 38
3.05674	0.053459	2.66656	0.049805	1.31	0.0104342	NM_001040432	ZCWPW2	Zinc finger, CW type with PWWP domain 2
10.7031	0.0487	10.313	0.04815	1.31	0.00774479	NM_006409	ARPC1A	Actin related protein 2/3 complex, subunit 1A, 41kDa
8.55507	0.015589	8.1651	0.02337	1.31	0.000141843	NM_020143	PNO1	Partner of NOB1 homolog (S. cerevisiae)
5.56246	0.055938	5.17257	0.00694	1.31	0.00972893	ENST00000313064	-	chromosome 2 open reading frame 52
3.69959	0.088965	3.30984	0.06506	1.31	0.0488832	ENST00000368153	-	cdna:pseudogene chromosome:NCBI36:1:156681493:156682428:-1 gene:ENSG00000203758
7.26965	0.054615	6.87991	0.120675	1.31	0.0241756	NM_001098426	SMARCD2	SWI/SNF related, matrix associated, actin dependent regulator of chromatin, subfamily d, member 2
8.69618	0.045553	8.30683	0.046215	1.31	0.00623565	NM_005484	PARP2	Poly (ADP-ribose) polymerase 2
4.11255	0.08266	3.72341	0.082645	1.31	0.0438619	NR_001278	-	cytochrome P450, family 2, subfamily B, polypeptide 7 pseudogene 1
4.62976	0.051786	4.24083	0.062145	1.31	0.0108522	ENST00000385966	-	ncrna:snoRNA_pseudogene chromosome:NCBI36:7:110536576:110536649:-1 gene:ENSG00000208701
3.62749	0.043273	3.23861	0.12596	1.31	0.0181867	AK131480	LOC389936	Similar to proline-rich proteoglycan 2
5.30551	0.067737	4.91667	0.044245	1.31	0.020878	NR_023386	-	ciliary rootlet coiled-coil, rootletin-like 2
2.70918	0.036184	2.32058	0.039215	1.31	0.00281316	NM_080831	DEFB129	Defensin, beta 129
2.98413	0.048199	2.59607	0.156615	1.31	0.0319466	NM_001080508	TBX18	T-box 18
7.60752	0.069503	7.21955	0.023675	1.31	0.0210937	NM_001032290	PSRC1	Proline/serine-rich coiled-coil 1
5.40858	0.050674	5.0207	0.09981	1.31	0.0164459	NM_032867	MICALCL	MICAL C-terminal like
4.7484	0.064897	4.3612	0.057945	1.31	0.0201718	NM_020737	LRFN2	Leucine rich repeat and fibronectin type III domain containing 2
5.87772	0.062007	5.49051	0.06182	1.31	0.0182107	NR_015415	-	hypothetical locus FLJ45244
4.66661	0.068047	4.27952	0.05869	1.31	0.0232275	NM_014471	SPINK4	Serine peptidase inhibitor, Kazal type 4
2.67449	0.054129	2.28754	0.02067	1.31	0.00924697	8142882	-
4.33512	0.061106	3.94839	0.11489	1.31	0.02865	AK027082	-	Homo sapiens cDNA: FLJ23429 fis, clone HRC10578.
8.0795	0.071791	7.69294	0.015175	1.31	0.023242	NM_021982	SEC24A	SEC24 family, member A (S. cerevisiae)
7.50202	0.076396	7.11573	0.021265	1.31	0.0285836	NM_005050	ABCD4	ATP-binding cassette, sub-family D (ALD), member 4
9.4632	0.038177	9.07742	0.173495	1.31	0.0330145	NM_016222	DDX41	DEAD (Asp-Glu-Ala-Asp) box polypeptide 41
3.56584	0.060063	3.18018	0.103225	1.31	0.0248031	NM_001004685	OR2F2	Olfactory receptor, family 2, subfamily F, member 2
10.6324	0.022553	10.2469	0.07955	1.31	0.00289013	NM_003258	TK1	Thymidine kinase 1, soluble
9.44342	0.039376	9.05809	0.034925	1.31	0.00357951	NM_017812	CHCHD3	Coiled-coil-helix-coiled-coil-helix domain containing 3
6.18378	0.0374	5.79856	0.018635	1.31	0.00254096	NM_198391	FLRT3	Fibronectin leucine rich transmembrane protein 3
8.16625	0.035741	7.7814	0.17887	1.31	0.0343218	NM_006860	RABL4	RAB, member of RAS oncogene family-like 4
7.52415	0.054732	7.13934	0.042305	1.31	0.0110757	NM_003364	UPP1	Uridine phosphorylase 1
5.75006	0.074201	5.3654	0.034965	1.31	0.0274354	NM_024657	MORC4	MORC family CW-type zinc finger 4
9.70337	0.026738	9.31874	0.005165	1.31	0.000668618	NM_006397	RNASEH2A	Ribonuclease H2, subunit A
9.07656	0.024069	8.69195	0.094185	1.31	0.00482631	NM_033512	TSPYL5	TSPY-like 5
6.36958	0.081253	5.98503	0.000215	1.31	0.0343412	NM_022041	GAN	Gigaxonin
7.3449	0.029425	6.96037	0.043785	1.31	0.0017377	NM_021127	PMAIP1	Phorbol-12-myristate-13-acetate-induced protein 1
6.40268	0.061815	6.01863	0.10348	1.31	0.026789	NM_207517	ADAMTSL3	ADAMTS-like 3
5.72358	0.048404	5.34091	0.03717	1.3	0.00733796	NM_194313	KIF24	Kinesin family member 24
5.56684	0.076748	5.18483	0.114115	1.3	0.0470261	NM_024420	PLA2G4A	Phospholipase A2, group IVA (cytosolic, calcium-dependent)
7.18272	0.040901	6.80077	0.031705	1.3	0.00403929	NM_174905	FAM98C	Family with sequence similarity 98, member C
7.78653	0.068988	7.40471	0.01134	1.3	0.0211775	NM_139321	ATRN	Attractin
6.07289	0.056935	5.69107	0.148125	1.3	0.0374876	ENST00000386211	-	ncrna:tRNA_pseudogene chromosome:NCBI36:1:144652936:144653006:1 gene:ENSG00000208946
10.0628	0.038976	9.68122	0.012	1.3	0.00292995	NM_012456	TIMM10	Translocase of inner mitochondrial membrane 10 homolog (yeast)
7.98133	0.060329	7.59976	0.004295	1.3	0.0135349	NM_016060	MED31	Mediator complex subunit 31
8.84905	0.041705	8.46779	0.08205	1.3	0.00896057	NR_003105	-	Zwilch, kinetochore associated, homolog (Drosophila)
2.19696	0.026431	1.81593	0.01223	1.3	0.000701095	ENST00000365027	-	ncrna:snRNA chromosome:NCBI36:2:239376265:239376377:1 gene:ENSG00000201897
9.91909	0.014082	9.5383	0.072165	1.3	0.00147593	NM_006600	NUDC	Nuclear distribution gene C homolog (A. nidulans)
8.72458	0.038629	8.34386	0.02881	1.3	0.00327202	NM_032144	RAB6A	RAB6A, member RAS oncogene family
7.92953	0.070092	7.54903	0.066135	1.3	0.0278598	NM_007269	STXBP3	Syntaxin binding protein 3
6.03045	0.078693	5.65003	0.046895	1.3	0.0351335	NM_002776	KLK10	Kallikrein-related peptidase 10
6.81273	0.06636	6.4327	0.01545	1.3	0.0190904	NM_001134375	CCNJ	Cyclin J
8.54816	0.080138	8.16883	0.04411	1.3	0.0369712	NM_020236	MRPL1	Mitochondrial ribosomal protein L1
10.0783	0.062401	9.6992	0.036665	1.3	0.0169828	NM_006503	PSMC4	Proteasome (prosome, macropain) 26S subunit, ATPase, 4
9.92123	0.060424	9.54226	0.007465	1.3	0.0139632	NM_016009	SH3GLB1	SH3-domain GRB2-like endophilin B1
7.01112	0.034974	6.63227	0.160205	1.3	0.0271433	NM_015655	ZNF337	Zinc finger protein 337
6.41338	0.038875	6.03479	0.044695	1.3	0.00418773	NM_015103	PLXND1	Plexin D1
6.38997	0.079568	6.01149	0.046415	1.3	0.0367565	NM_014369	PTPN18	Protein tyrosine phosphatase, non-receptor type 18 (brain-derived)
4.05188	0.044004	3.6734	0.031195	1.3	0.00529993	ENST00000365068	-	ncrna:misc_RNA chromosome:NCBI36:9:97905182:97905277:-1 gene:ENSG00000201938
6.7791	0.077016	6.40072	0.00058	1.3	0.0306365	NM_173359	EIF4E3	Eukaryotic translation initiation factor 4E family member 3
8.69636	0.033418	8.31854	0.191385	1.3	0.041388	NR_000034	-	transmembrane protein 185B (pseudogene)
6.66324	0.022008	6.28598	0.20504	1.3	0.0438596	NM_001008392	CTDSPL	CTD (carboxy-terminal domain, RNA polymerase II, polypeptide A) small phosphatase-like
9.66487	0.043854	9.28769	0.029945	1.3	0.00524807	NM_001008938	CKAP5	Cytoskeleton associated protein 5
5.83379	0.053457	5.45662	0.05504	1.3	0.0122893	NM_016274	PLEKHO1	Pleckstrin homology domain containing, family O member 1
5.67331	0.049373	5.29637	0.11636	1.3	0.0214336	ENST00000385908	-	ncrna:scRNA_pseudogene chromosome:NCBI36:2:112404275:112404513:1 gene:ENSG00000208643
7.50678	0.0197	7.12991	0.1622	1.3	0.0220281	NM_005985	SNAI1	Snail homolog 1 (Drosophila)
8.60953	0.058322	8.23352	0.0213	1.3	0.013147	NM_033480	FBXO9	F-box protein 9
7.4983	0.036776	7.12254	0.12709	1.3	0.0169731	NM_001136198	FZR1	Fizzy/cell division cycle 20 related 1 (Drosophila)
6.17692	0.038149	5.80165	0.05691	1.3	0.00498917	NM_001083961	WDR62	WD repeat domain 62
4.52531	0.074491	4.15008	0.020445	1.3	0.0289071	NM_201402	DUB3	Deubiquitinating enzyme 3
8.63959	0.009559	8.26449	0.02583	1.3	6.16221e-05	NM_018385	LSG1	Large subunit GTPase 1 homolog (S. cerevisiae)
6.93807	0.079769	6.56309	0.085245	1.3	0.04536	NM_024308	DHRS11	Dehydrogenase/reductase (SDR family) member 11
10.2003	0.0334	9.82542	0.08648	1.3	0.00678359	NM_001098616	C1orf43	Chromosome 1 open reading frame 43
6.09063	0.049241	5.71633	0.012215	1.3	0.00727206	NM_203406	MBLAC2	Metallo-beta-lactamase domain containing 2
7.52497	0.063639	7.15092	0.0803	1.3	0.0252726	NM_003249	THOP1	Thimet oligopeptidase 1
3.31717	0.047738	2.94352	0.111175	1.3	0.0194074	NM_031418	ANO3	Anoctamin 3
6.84189	0.05422	6.46861	0.004895	1.3	0.0101336	NM_000964	RARA	Retinoic acid receptor, alpha
8.06899	0.04858	7.69587	0.002175	1.3	0.00688777	NR_003017	SNORA71C	Small nucleolar RNA, H/ACA box 71C
6.99338	0.022096	6.62026	0.05441	1.3	0.00136283	NM_016647	C8orf55	Chromosome 8 open reading frame 55
7.99147	0.04948	7.61845	0.041785	1.3	0.00896128	NM_058219	EXOSC6	Exosome component 6
2.7206	0.023309	2.34778	0.05651	1.29	0.00162548	ENST00000387353	-	ncrna:snoRNA_pseudogene chromosome:NCBI36:4:34644258:34644361:-1 gene:ENSG00000210088
6.60868	0.033192	6.23597	0.05279	1.29	0.00328564	NM_001080477	ODZ3	Odz, odd Oz/ten-m homolog 3 (Drosophila)
8.14767	0.042471	7.77503	0.099445	1.29	0.013388	NM_006805	HNRNPA0	Heterogeneous nuclear ribonucleoprotein A0
3.45101	0.056461	3.0785	0.0361	1.29	0.0130976	ENST00000410850	-	ncrna:misc_RNA chromosome:NCBI36:7:33051936:33052227:-1 gene:ENSG00000222782
3.41269	0.059928	3.04035	0.00881	1.29	0.0144391	ENST00000388552	-	ncrna:snRNA_pseudogene chromosome:NCBI36:6:76803795:76803931:-1 gene:ENSG00000211287
8.69729	0.045854	8.32536	0.140525	1.29	0.0278835	NM_003548	HIST2H4A	Histone cluster 2, H4a
8.69729	0.045854	8.32536	0.140525	1.29	0.0278835	NM_003548	HIST2H4A	Histone cluster 2, H4a
8.78315	0.032827	8.41159	0.094545	1.29	0.00810935	NM_004900	APOBEC3B	Apolipoprotein B mRNA editing enzyme, catalytic polypeptide-like 3B
8.0678	0.051126	7.69625	0.07827	1.29	0.0147513	NM_006821	ACOT2	Acyl-CoA thioesterase 2
5.20148	0.048972	4.83019	0.001315	1.29	0.00720989	NM_006897	HOXC9	Homeobox C9
4.56166	0.073687	4.19071	0.087645	1.29	0.0392016	NM_001105579	TMEM90A	Transmembrane protein 90A
5.34769	0.073249	4.97696	0.114245	1.29	0.0465745	NM_145036	CCDC46	Coiled-coil domain containing 46
6.83866	0.059625	6.46793	0.120735	1.29	0.0330655	BC011833	C19orf52	Chromosome 19 open reading frame 52
4.88335	0.08801	4.51263	0.00872	1.29	0.0485199	NM_012450	SLC13A4	Solute carrier family 13 (sodium/sulfate symporters), member 4
6.99575	0.058924	6.62599	0.094455	1.29	0.0248864	NM_144611	CYB5D2	Cytochrome b5 domain containing 2
8.74194	0.029503	8.37236	0.00689	1.29	0.00114351	NM_152407	GRPEL2	GrpE-like 2, mitochondrial (E. coli)
9.17947	0.05175	8.81014	0.075715	1.29	0.0150401	NM_080668	CDCA5	Cell division cycle associated 5
6.23117	0.076661	5.86189	0.01318	1.29	0.0327925	NM_152463	EME1	Essential meiotic endonuclease 1 homolog 1 (S. pombe)
7.99027	0.048286	7.62102	0.00767	1.29	0.00704408	NM_001018102	GCOM1	GRINL1A complex locus
8.39471	0.026167	8.02573	0.081165	1.29	0.00432377	NM_013291	CPSF1	Cleavage and polyadenylation specific factor 1, 160kDa
4.56466	0.073667	4.19571	0.000125	1.29	0.0288656	NM_198461	LONRF2	LON peptidase N-terminal domain and ring finger 2
8.10827	0.07541	7.73949	0.089115	1.29	0.0425454	NM_030771	CCDC34	Coiled-coil domain containing 34
10.7928	0.015437	10.425	0.0462	1.29	0.000549084	NM_006811	SERINC3	Serine incorporator 3
2.91382	0.041775	2.54607	0.04241	1.29	0.0056114	ENST00000388341	-	ncrna:Mt_tRNA_pseudogene chromosome:NCBI36:7:63208046:63208107:1 gene:ENSG00000211076
8.98223	0.028356	8.61448	0.05784	1.29	0.00266395	NM_005762	TRIM28	Tripartite motif-containing 28
7.93779	0.072046	7.57016	0.04394	1.29	0.0299048	NM_001099293	KIF4B	Kinesin family member 4B
7.39187	0.043858	7.02437	0.14127	1.29	0.0277504	NR_002564	-	small nucleolar RNA, C/D box 26
8.67184	0.064724	8.3047	0.08883	1.29	0.0299609	NM_006565	CTCF	CCCTC-binding factor (zinc finger protein)
3.73369	0.028485	3.36682	0.12806	1.29	0.0147555	NM_001005480	OR2A2	Olfactory receptor, family 2, subfamily A, member 2
7.58228	0.072408	7.2161	0.054505	1.29	0.032196	NM_005441	CHAF1B	Chromatin assembly factor 1, subunit B (p60)
2.39639	0.082355	2.03034	0.020905	1.29	0.0420748	NM_032517	LYZL1	Lysozyme-like 1
3.10238	0.048024	2.73701	0.014915	1.29	0.00732473	ENST00000410348	-	ncrna:misc_RNA chromosome:NCBI36:15:39271457:39271755:-1 gene:ENSG00000222280
4.33956	0.055376	3.97431	0.011765	1.29	0.0118668	ENST00000299415	-	Coiled-coil domain-containing protein ENSP00000299415 gene:ENSG00000166329
6.19745	0.086842	5.83247	0.026825	1.29	0.049822	ENST00000308963	-	chromosome 11 open reading frame 86
6.68413	0.044571	6.31976	0.02416	1.29	0.00600031	NM_021931	DHX35	DEAH (Asp-Glu-Ala-His) box polypeptide 35
3.28468	0.061127	2.92043	0.074075	1.29	0.0235727	ENST00000365106	-	ncrna:snRNA chromosome:NCBI36:3:127361816:127361978:-1 gene:ENSG00000201976
6.8584	0.043926	6.49425	0.060045	1.29	0.0084854	NM_022918	TMEM135	Transmembrane protein 135
6.19848	0.048334	5.83462	0.02495	1.29	0.0079812	NM_138440	VASN	Vasorin
3.55118	0.080143	3.18745	0.00585	1.29	0.0389992	NM_000948	PRL	Prolactin
3.96455	0.07999	3.601	0.032935	1.29	0.0404122	NM_001010969	CYP4A11	Cytochrome P450, family 4, subfamily A, polypeptide 11
5.26867	0.05949	4.90526	0.134025	1.29	0.0400386	AK023050	-	Homo sapiens cDNA FLJ12988 fis, clone NT2RP3000080.
3.90118	0.030261	3.53784	0.19487	1.29	0.0465899	ENST00000387408	-	ncrna:scRNA_pseudogene chromosome:NCBI36:4:37945157:37945437:-1 gene:ENSG00000210143
6.40632	0.033769	6.04314	0.002095	1.29	0.00200604	NM_177968	PPM1B	Protein phosphatase 1B (formerly 2C), magnesium-dependent, beta isoform
10.0251	0.022118	9.66193	0.072375	1.29	0.00279385	NM_014502	PRPF19	PRP19/PSO4 pre-mRNA processing factor 19 homolog (S. cerevisiae)
7.34582	0.043374	6.98276	0.063125	1.29	0.00866404	NM_007122	USF1	Upstream transcription factor 1
7.07646	0.05934	6.71344	0.11153	1.29	0.0318043	NM_144636	CHCHD4	Coiled-coil-helix-coiled-coil-helix domain containing 4
7.66615	0.077332	7.30355	0.02284	1.29	0.0361009	NM_016495	TBC1D7	TBC1 domain family, member 7
7.18123	0.043911	6.81917	0.07564	1.29	0.0108524	NM_005629	SLC6A8	Solute carrier family 6 (neurotransmitter transporter, creatine), member 8
2.18269	0.047277	1.82069	0.036685	1.29	0.00824235	ENST00000386633	-	ncrna:snoRNA_pseudogene chromosome:NCBI36:10:4994627:4994761:-1 gene:ENSG00000209368
2.18269	0.047277	1.82069	0.036685	1.29	0.00824235	ENST00000386633	-	ncrna:snoRNA_pseudogene chromosome:NCBI36:10:4994627:4994761:-1 gene:ENSG00000209368
6.67462	0.052929	6.31296	0.12556	1.28	0.0307237	NM_001014445	NLE1	Notchless homolog 1 (Drosophila)
4.7147	0.06621	4.35314	0.09943	1.28	0.0360932	ENST00000388413	-	ncrna:snRNA_pseudogene chromosome:NCBI36:8:64684562:64684711:-1 gene:ENSG00000211148
9.75289	0.06892	9.39133	0.058365	1.28	0.0297834	NM_005782	THOC4	THO complex 4
4.24481	0.043946	3.88332	0.128065	1.28	0.0242627	NM_001004313	TMEM220	Transmembrane protein 220
4.02154	0.061912	3.66019	0.000415	1.28	0.0176755	ENST00000391138	-	ncrna:snoRNA chromosome:NCBI36:12:9330536:9330660:-1 gene:ENSG00000212440
7.80782	0.077055	7.44674	0.035335	1.28	0.0372717	NM_006195	PBX3	Pre-B-cell leukemia homeobox 3
6.99581	0.049286	6.63478	0.077125	1.28	0.0146665	NM_004563	PCK2	Phosphoenolpyruvate carboxykinase 2 (mitochondrial)
6.37956	0.038991	6.01882	0.137555	1.28	0.024501	NM_000059	BRCA2	Breast cancer 2, early onset
9.03395	0.056393	8.67335	0.04728	1.28	0.0156916	NM_016056	TMBIM4	Transmembrane BAX inhibitor motif containing 4
8.12649	0.051827	7.76612	0.00387	1.28	0.00978216	NM_002168	IDH2	Isocitrate dehydrogenase 2 (NADP+), mitochondrial
8.92	0.051803	8.55979	0.02397	1.28	0.0103775	NM_005530	IDH3A	Isocitrate dehydrogenase 3 (NAD+) alpha
9.11847	0.033105	8.75835	0.021895	1.28	0.00219064	NM_014865	NCAPD2	Non-SMC condensin I complex, subunit D2
10.4808	0.066451	10.1209	0.02665	1.28	0.0235123	NM_001511	CXCL1	Chemokine (C-X-C motif) ligand 1 (melanoma growth stimulating activity, alpha)
9.03503	0.040812	8.67516	0.14263	1.28	0.0279409	NM_016024	RBMX2	RNA binding motif protein, X-linked 2
5.0538	0.046322	4.69465	0.01709	1.28	0.00692812	NM_003495	HIST1H4I	Histone cluster 1, H4i
7.51343	0.057599	7.15436	0.06462	1.28	0.0194608	NM_018718	TSGA14	Testis specific, 14
7.62355	0.067269	7.2645	0.005985	1.28	0.0236705	NM_002192	INHBA	Inhibin, beta A
10.8685	0.060822	10.5099	0.01685	1.28	0.0174454	NM_003545	HIST1H4E	Histone cluster 1, H4e
5.00626	0.044851	4.64762	0.008185	1.28	0.00602143	ENST00000411385	-	ncrna:misc_RNA chromosome:NCBI36:20:47771893:47772189:1 gene:ENSG00000223317
8.25994	0.036795	7.9013	0.12087	1.28	0.0177764	NM_032314	COQ5	Coenzyme Q5 homolog, methyltransferase (S. cerevisiae)
7.09235	0.049245	6.73386	0.084625	1.28	0.0164991	NM_015106	RAD54L2	RAD54-like 2 (S. cerevisiae)
9.33239	0.02664	8.97394	0.091865	1.28	0.00653984	AF130099	-	Homo sapiens clone FLC1464 PRO3102 mRNA, complete cds.
7.08786	0.059634	6.72989	0.11315	1.28	0.0340634	NM_004260	RECQL4	RecQ protein-like 4
7.53057	0.024068	7.17281	0.060855	1.28	0.00231937	NM_012393	PFAS	Phosphoribosylformylglycinamidine synthase
7.04542	0.044314	6.68771	0.00988	1.28	0.00584877	8095758	-
8.79064	0.039443	8.43328	0.080475	1.28	0.0097274	NM_152329	PPIL5	Peptidylprolyl isomerase (cyclophilin)-like 5
9.77974	0.039867	9.42245	0.006075	1.28	0.0039715	NM_001294	CLPTM1	Cleft lip and palate associated transmembrane protein 1
8.90609	0.068091	8.54913	0.017945	1.28	0.0254716	NM_001130823	DNMT1	DNA (cytosine-5-)-methyltransferase 1
4.34911	0.045929	3.9923	0.10439	1.28	0.019161	BC035007	FAM71A	Family with sequence similarity 71, member A
3.22517	0.062085	2.86861	0.105745	1.28	0.0347298	NM_198493	ANKRD45	Ankyrin repeat domain 45
6.37863	0.079743	6.02215	0.027165	1.28	0.0418935	NM_001099282	ZNF239	Zinc finger protein 239
7.07475	0.049249	6.71846	0.09094	1.28	0.0182835	NM_005629	SLC6A8	Solute carrier family 6 (neurotransmitter transporter, creatine), member 8
5.94207	0.078259	5.58587	0.02536	1.28	0.0396222	NM_005018	PDCD1	Programmed cell death 1
2.61168	0.038532	2.25553	0.044975	1.28	0.00511416	NM_015225	PRUNE2	Prune homolog 2 (Drosophila)
3.3554	0.03157	2.99964	0.12509	1.28	0.0168127	ENST00000328207	-	cdna:known chromosome:NCBI36:12:47239869:47243000:1 gene:ENSG00000198678
5.79973	0.073809	5.44433	0.036525	1.28	0.0346293	NM_012135	FAM50B	Family with sequence similarity 50, member B
6.27538	0.062847	5.92054	0.051855	1.28	0.0234355	BC025334	CXorf38	Chromosome X open reading frame 38
4.9403	0.081201	4.58548	0.00308	1.28	0.0435578	NM_017899	TESC	Tescalcin
8.82472	0.029911	8.47001	0.061695	1.28	0.00377181	NM_024958	NRSN2	Neurensin 2
4.65977	0.066344	4.3053	0.122605	1.28	0.0467067	NM_173847	SPACA3	Sperm acrosome associated 3
9.10778	0.062239	8.75352	0.006175	1.28	0.0192445	NM_016441	CRIM1	Cysteine rich transmembrane BMP regulator 1 (chordin-like)
5.04976	0.064987	4.69553	0.04147	1.28	0.0245275	NM_001018049	PAEP	Progestagen-associated endometrial protein
4.91469	0.051488	4.56097	0.1569	1.28	0.0454953	ENST00000410215	-	ncrna:misc_RNA chromosome:NCBI36:14:70146556:70146847:1 gene:ENSG00000222147
2.43639	0.049914	2.0831	0.081455	1.28	0.017146	NM_000846	GSTA2	Glutathione S-transferase alpha 2
6.41884	0.078715	6.06574	0.017365	1.28	0.0407978	NM_019086	FLJ20674	Hypothetical protein FLJ20674
9.17606	0.035404	8.82337	0.04636	1.28	0.00424069	NM_182565	FAM100B	Family with sequence similarity 100, member B
8.19158	0.03464	7.83924	0.049255	1.28	0.00422052	NM_000107	DDB2	Damage-specific DNA binding protein 2, 48kDa
2.30426	0.035422	1.95192	0.17039	1.28	0.0395846	ENST00000385650	-	ncrna:snoRNA_pseudogene chromosome:NCBI36:3:184654615:184654744:1 gene:ENSG00000208385
7.25028	0.056203	6.898	0.04098	1.28	0.0160637	NM_019096	GTPBP2	GTP binding protein 2
2.82576	0.072009	2.47351	0.05476	1.28	0.0357141	NM_000253	MTTP	Microsomal triglyceride transfer protein
4.45205	0.078381	4.09992	0.004925	1.28	0.0401792	NM_201402	DUB3	Deubiquitinating enzyme 3
6.52097	0.005322	6.16892	0.09401	1.28	0.00374942	NM_178449	PTH2	Parathyroid hormone 2
8.72082	0.040009	8.36881	0.031315	1.28	0.00503367	NM_002532	NUP88	Nucleoporin 88kDa
10.439	0.026701	10.0874	0.0324	1.28	0.00141135	NM_003670	BHLHE40	Basic helix-loop-helix family, member e40
5.08763	0.013601	4.73674	0.02926	1.28	0.000206831	NM_201628	-	Kazrin, mRNA (cDNA clone MGC:20906 IMAGE:4556194)
9.09689	0.022392	8.74607	0.014745	1.28	0.000543596	NM_004630	SF1	Splicing factor 1
9.62945	0.052608	9.27864	0.04552	1.28	0.013788	NM_032593	HINT2	Histidine triad nucleotide binding protein 2
3.48375	0.070095	3.133	0.02017	1.28	0.029565	ENST00000388371	-	ncrna:scRNA_pseudogene chromosome:NCBI36:3:80924563:80924736:-1 gene:ENSG00000211106
4.33672	0.068048	3.98608	0.09142	1.28	0.0394739	AF258576	LOC200261	Hypothetical LOC200261
5.66969	0.037236	5.31919	0.110065	1.28	0.0160748	NM_173689	CRB2	Crumbs homolog 2 (Drosophila)
8.45937	0.04578	8.10896	0.13266	1.27	0.0300982	NM_018116	MSTO1	Misato homolog 1 (Drosophila)
6.12047	0.069373	5.77017	0.05893	1.27	0.0335189	AK128486	-	CDNA FLJ46633 fis, clone TRACH2025705
4.19101	0.060024	3.84078	0.02376	1.27	0.0184581	ENST00000410999	-	ncrna:misc_RNA chromosome:NCBI36:14:23330979:23331267:1 gene:ENSG00000222931
8.35685	0.058149	8.0071	0.069565	1.27	0.0226972	NM_006623	PHGDH	Phosphoglycerate dehydrogenase
6.71636	0.055788	6.36667	0.082305	1.27	0.0231749	NM_178229	IQGAP3	IQ motif containing GTPase activating protein 3
7.36775	0.024354	7.01811	0.060735	1.27	0.00257209	NM_018323	PI4K2B	Phosphatidylinositol 4-kinase type 2 beta
8.16306	0.039928	7.814	0.05641	1.27	0.00723811	NM_004629	FANCG	Fanconi anemia, complementation group G
6.31638	0.049854	5.96737	0.025115	1.27	0.0102495	NM_005205	COX6A2	Cytochrome c oxidase subunit VIa polypeptide 2
10.181	0.07009	9.83201	0.022355	1.27	0.0301675	NM_000693	ALDH1A3	Aldehyde dehydrogenase 1 family, member A3
8.56561	0.030118	8.21665	0.026425	1.27	0.00189984	NM_020165	RAD18	RAD18 homolog (S. cerevisiae)
7.38179	0.039294	7.03317	0.070795	1.27	0.00887512	NM_000135	FANCA	Fanconi anemia, complementation group A
4.58754	0.053092	4.2392	0.05099	1.27	0.0151953	NM_006669	LILRB1	Leukocyte immunoglobulin-like receptor, subfamily B (with TM and ITIM domains), member 1
8.01035	0.074901	7.66202	0.081195	1.27	0.0471008	NM_031445	AMMECR1L	AMME chromosomal region gene 1-like
7.55668	0.06138	7.2084	0.136585	1.27	0.0488167	NM_013258	PYCARD	PYD and CARD domain containing
6.79643	0.047906	6.44815	0.14338	1.27	0.0373071	NM_006693	CPSF4	Cleavage and polyadenylation specific factor 4, 30kDa
9.55244	0.033864	9.20421	0.01243	1.27	0.00247063	NM_005804	DDX39	DEAD (Asp-Glu-Ala-Asp) box polypeptide 39
3.0381	0.044528	2.68999	0.01923	1.27	0.0068262	ENST00000410684	-	ncrna:misc_RNA chromosome:NCBI36:2:22937929:22938245:1 gene:ENSG00000222616
4.44535	0.059758	4.09726	0.06931	1.27	0.0246776	NM_052872	IL17F	Interleukin 17F
5.63891	0.070672	5.29089	0.1081	1.27	0.0495813	ENST00000379222	-	keratin pseudogene
9.56122	0.003212	9.21323	0.13337	1.27	0.0131228	NM_006666	RUVBL2	RuvB-like 2 (E. coli)
7.39272	0.041662	7.04485	0.04792	1.27	0.00728843	NM_152490	B3GALNT2	Beta-1,3-N-acetylgalactosaminyltransferase 2
6.42874	0.066944	6.08091	0.01806	1.27	0.0262208	NM_052831	C6orf192	Chromosome 6 open reading frame 192
7.6158	0.07358	7.26818	0.03742	1.27	0.0367931	NM_001310	CREBL2	CAMP responsive element binding protein-like 2
7.83076	0.047911	7.4832	0.0624	1.27	0.012949	NM_004337	OSGIN2	Oxidative stress induced growth inhibitor family member 2
8.64227	0.065199	8.29482	0.04104	1.27	0.0262708	NM_057175	NARG1	NMDA receptor regulated 1
9.32223	0.045051	8.97485	0.004485	1.27	0.00680816	NM_014669	NUP93	Nucleoporin 93kDa
5.75692	0.019108	5.40977	0.019255	1.27	0.000361696	ENST00000387546	-	ncrna:rRNA_pseudogene chromosome:NCBI36:1:42551886:42552058:1 gene:ENSG00000210281
6.84519	0.078303	6.49834	0.02325	1.27	0.0427448	NM_153219	ZNF524	Zinc finger protein 524
8.40258	0.044523	8.05582	0.003705	1.27	0.00656438	NM_080678	UBE2F	Ubiquitin-conjugating enzyme E2F (putative)
8.8476	0.036792	8.5011	0.07329	1.27	0.00821331	NM_032223	PCNXL3	Pecanex-like 3 (Drosophila)
9.01421	0.034904	8.66788	0.06208	1.27	0.00587506	NM_000214	JAG1	Jagged 1 (Alagille syndrome)
8.12633	0.039161	7.78003	0.032285	1.27	0.00503289	NM_002103	GYS1	Glycogen synthase 1 (muscle)
7.36244	0.078786	7.0162	0.01108	1.27	0.043029	NM_001083965	TDRKH	Tudor and KH domain containing
10.342	0.041222	9.99584	0.03096	1.27	0.00587622	NM_001540	HSPB1	Heat shock 27kDa protein 1
6.11963	0.044449	5.77353	0.01864	1.27	0.0069025	NM_001408	CELSR2	Cadherin, EGF LAG seven-pass G-type receptor 2 (flamingo homolog, Drosophila)
4.40308	0.079022	4.05712	0.0278	1.27	0.0446082	ENST00000388625	-	ncrna:snRNA_pseudogene chromosome:NCBI36:6:82976780:82976876:-1 gene:ENSG00000211360
4.99268	0.0787	4.64694	0.00564	1.27	0.0429212	NM_006095	ATP8A1	ATPase, aminophospholipid transporter (APLT), class I, type 8A, member 1
3.84673	0.037167	3.50139	0.02711	1.27	0.00403603	AK123815	-	CDNA FLJ41821 fis, clone NT2RI2016128
8.1416	0.031358	7.79625	0.10463	1.27	0.0122065	NM_017859	UCKL1	Uridine-cytidine kinase 1-like 1
2.31195	0.002268	1.96854	0.029775	1.27	5.00863e-05	ENST00000384218	-	ncrna:snRNA chromosome:NCBI36:Y:18410277:18410436:-1 gene:ENSG00000206945
2.31195	0.002268	1.96854	0.029775	1.27	5.00863e-05	ENST00000384218	-	ncrna:snRNA chromosome:NCBI36:Y:18410277:18410436:-1 gene:ENSG00000206945
8.50681	0.050415	8.16368	0.08806	1.27	0.0209391	NM_004969	IDE	Insulin-degrading enzyme
9.82352	0.061161	9.48045	0.00689	1.27	0.0201995	NM_005318	H1F0	H1 histone family, member 0
10.0444	0.028202	9.70148	0.002275	1.27	0.00126177	NM_012112	TPX2	TPX2, microtubule-associated, homolog (Xenopus laevis)
8.2872	0.029036	7.94435	0.00455	1.27	0.00141871	NM_004507	HUS1	HUS1 checkpoint homolog (S. pombe)
7.05879	0.064848	6.71631	0.023125	1.27	0.0252596	NM_014708	KNTC1	Kinetochore associated 1
3.26448	0.046366	2.92226	0.01543	1.27	0.0081856	ENST00000332534	-	cdna:pseudogene chromosome:NCBI36:1:94540182:94541169:1 gene:ENSG00000178596
6.24057	0.064708	5.89858	0.05722	1.27	0.02954	NR_026678	-	transmembrane protein 79
7.78882	0.076427	7.44684	0.06914	1.27	0.0488968	NM_001135243	TCOF1	Treacher Collins-Franceschetti syndrome 1
4.80747	0.065791	4.46556	0.049035	1.27	0.0295261	ENST00000385490	-	ncrna:snoRNA_pseudogene chromosome:NCBI36:2:156986954:156987056:1 gene:ENSG00000208225
5.57524	0.065946	5.23339	0.065845	1.27	0.0328929	NM_005786	TSHZ1	Teashirt zinc finger homeobox 1
4.56206	0.034075	4.22028	0.107085	1.27	0.0147242	NM_001086	AADAC	Arylacetamide deacetylase (esterase)
3.00669	0.060019	2.66499	0.019655	1.27	0.0197426	NM_001001920	OR4C15	Olfactory receptor, family 4, subfamily C, member 15
2.10825	0.050203	1.7668	0.01307	1.27	0.0107497	ENST00000410194	-	ncrna:snRNA chromosome:NCBI36:2:149299723:149299909:-1 gene:ENSG00000222126
4.33238	0.07103	3.99153	0.07072	1.27	0.0414044	NM_018397	CHDH	Choline dehydrogenase
4.01583	0.071103	3.67503	0.055865	1.27	0.0383021	U82320	-	Unknown protein
8.4528	0.036097	8.11204	0.077235	1.27	0.00903843	NM_033083	EAF1	ELL associated factor 1
7.52243	0.047171	7.18203	0.045865	1.27	0.0110609	ENST00000326237	-	hypothetical LOC442075
7.09203	0.059668	6.75174	0.034055	1.27	0.0207829	NM_001047	SRD5A1	Steroid-5-alpha-reductase, alpha polypeptide 1 (3-oxo-5 alpha-steroid delta 4-dehydrogenase alpha 1)
10.3239	0.030718	9.98362	0.029875	1.27	0.00236085	NM_002270	TNPO1	Transportin 1
7.4257	0.012981	7.08615	0.03993	1.27	0.000407586	NM_003169	SUPT5H	Suppressor of Ty 5 homolog (S. cerevisiae)
4.34417	0.077097	4.00462	0.063395	1.27	0.0496418	NM_030925	CAB39L	Calcium binding protein 39-like
4.17859	0.04791	3.83913	0.048285	1.27	0.011983	NM_173623	TTLL6	Tubulin tyrosine ligase-like family, member 6
5.50975	0.063364	5.17041	0.02434	1.27	0.0242923	NM_130769	GPHA2	Glycoprotein hormone alpha 2
7.93066	0.05117	7.59153	0.00018	1.26	0.0115261	NM_000190	HMBS	Hydroxymethylbilane synthase
7.92711	0.032379	7.58823	0.06645	1.26	0.0058924	NR_002561	-	small nucleolar RNA, C/D box 30
9.4822	0.050479	9.14348	0.065865	1.26	0.0168429	NM_017528	WBSCR22	Williams Beuren syndrome chromosome region 22
3.49358	0.061848	3.15514	0.0104	1.26	0.0219747	NR_026951	-	chromosome 17 open reading frame 44
5.91729	0.034922	5.57902	0.125325	1.26	0.0219558	ENST00000365159	-	ncrna:snRNA chromosome:NCBI36:2:159591794:159591900:-1 gene:ENSG00000202029
9.12975	0.037088	8.79166	0.0118	1.26	0.00381995	NM_002094	GSPT1	G1 to S phase transition 1
10.6221	0.016013	10.284	0.1481	1.26	0.0226878	NM_005517	HMGN2	High-mobility group nucleosomal binding domain 2
9.6915	0.064378	9.35348	0.04182	1.26	0.0276971	NM_005782	THOC4	THO complex 4
3.47612	0.053064	3.13815	0.04669	1.26	0.0161835	NM_006206	PDGFRA	Platelet-derived growth factor receptor, alpha polypeptide
2.58951	0.041574	2.2519	0.025905	1.26	0.00631146	NR_003134	-	G-protein coupled receptor-like
4.18756	0.056984	3.85008	0.081525	1.26	0.0270461	NM_017734	PALMD	Palmdelphin
8.21365	0.039667	7.87655	0.1392	1.26	0.031592	NM_015963	THAP4	THAP domain containing 4
8.21365	0.039667	7.87655	0.1392	1.26	0.031592	NM_015963	THAP4	THAP domain containing 4
8.79998	0.058701	8.4629	0.00638	1.26	0.0187058	NM_016095	GINS2	GINS complex subunit 2 (Psf2 homolog)
3.94544	0.076435	3.60862	0.008535	1.26	0.042613	ENST00000364694	-	ncrna:misc_RNA chromosome:NCBI36:11:9659047:9659367:1 gene:ENSG00000201564
7.25634	0.072006	6.91965	0.025655	1.26	0.0367573	NM_153050	MTMR3	Myotubularin related protein 3
9.2565	0.06104	8.92001	0.12405	1.26	0.0474226	NM_001605	AARS	Alanyl-tRNA synthetase
7.36172	0.034164	7.02526	0.00269	1.26	0.00278979	NM_001928	CFD	Complement factor D (adipsin)
7.3236	0.070723	6.9872	0.0332	1.26	0.0357214	NM_022361	POPDC3	Popeye domain containing 3
10.4122	0.061792	10.0758	0.111155	1.26	0.0430226	NM_031966	CCNB1	Cyclin B1
6.8091	0.037725	6.47302	0.004895	1.26	0.0040516	NM_006661	PDE10A	Phosphodiesterase 10A
6.70642	0.022316	6.37057	0.1359	1.26	0.0200501	NM_213602	SIGLEC15	Sialic acid binding Ig-like lectin 15
8.51163	0.050962	8.17601	0.09054	1.26	0.0237114	NM_024713	C15orf29	Chromosome 15 open reading frame 29
8.27219	0.045721	7.93659	0.042275	1.26	0.0101979	NM_015201	BOP1	Block of proliferation 1
7.36462	0.047859	7.02912	0.100425	1.26	0.0238161	NM_000390	CHM	Choroideremia (Rab escort protein 1)
5.42455	0.073713	5.08913	0.021375	1.26	0.0394499	NM_014581	OBP2B	Odorant binding protein 2B
7.18576	0.0461	6.85074	0.01853	1.26	0.00876941	NM_033429	CALML4	Calmodulin-like 4
8.53357	0.05168	8.19902	0.05163	1.26	0.0161828	NM_032118	WDR54	WD repeat domain 54
7.69253	0.058539	7.35813	0.026965	1.26	0.0200742	NM_001039569	AP1S3	Adaptor-related protein complex 1, sigma 3 subunit
7.46198	0.064827	7.12803	0.065535	1.26	0.0337095	NM_024657	MORC4	MORC family CW-type zinc finger 4
4.60046	0.041323	4.26654	0.019185	1.26	0.00611661	NM_022355	DPEP2	Dipeptidase 2
5.90311	0.068676	5.56926	0.096195	1.26	0.0481509	NM_015124	GRAMD4	GRAM domain containing 4
4.47613	0.025487	4.14243	0.148185	1.26	0.0275561	NM_053280	ODF3	Outer dense fiber of sperm tails 3
7.89244	0.037204	7.55877	0.000835	1.26	0.00393348	NM_015540	RPAP1	RNA polymerase II associated protein 1
3.69351	0.032407	3.3599	0.1234	1.26	0.0206019	ENST00000388193	-	ncrna:snRNA_pseudogene chromosome:NCBI36:1:67434415:67434511:1 gene:ENSG00000210928
6.11843	0.032832	5.78501	0.036225	1.26	0.00349785	NM_000908	NPR3	Natriuretic peptide receptor C/guanylate cyclase C (atrionatriuretic peptide receptor C)
9.05227	0.040185	8.71893	0.01732	1.26	0.00551949	NM_002105	H2AFX	H2A histone family, member X
5.71752	0.041802	5.38438	0.100975	1.26	0.0193845	ENST00000319509	-	mucin 3A, cell surface associated
6.31894	0.039437	5.98586	0.15969	1.26	0.0434902	NM_004522	KIF5C	Kinesin family member 5C
10.6185	0.017992	10.2855	0.0297	1.26	0.000514034	NM_003524	HIST1H2BH	Histone cluster 1, H2bh
8.62799	0.035761	8.29532	0.046225	1.26	0.00538125	NM_020921	NIN	Ninein (GSK3B interacting protein)
4.68314	0.052762	4.35061	0.0437	1.26	0.0163984	NM_024806	C11orf63	Chromosome 11 open reading frame 63
7.78038	0.068535	7.44794	0.070285	1.26	0.0406227	NM_152524	SGOL2	Shugoshin-like 2 (S. pombe)
6.05507	0.050534	5.72274	0.1054	1.26	0.0288883	NM_005740	DNAL4	Dynein, axonemal, light chain 4
5.04187	0.05733	4.70976	0.12334	1.26	0.0440454	NM_003535	HIST1H3J	Histone cluster 1, H3j
6.54928	0.070515	6.21804	0.007185	1.26	0.0352192	NM_014319	LEMD3	LEM domain containing 3
5.85774	0.032028	5.52698	0.10437	1.26	0.014414	NM_003468	FZD5	Frizzled homolog 5 (Drosophila)
6.75314	0.016839	6.42262	0.08788	1.26	0.00512404	NM_018144	SEC61A2	Sec61 alpha 2 subunit (S. cerevisiae)
5.52545	0.024942	5.19526	0.09265	1.26	0.00828876	NM_014747	RIMS3	Regulating synaptic membrane exocytosis 3
8.17393	0.042058	7.84391	0.003615	1.26	0.00639296	NM_012247	SEPHS1	Selenophosphate synthetase 1
7.74225	0.049518	7.41233	0.064795	1.26	0.0172812	XM_929793	LOC646836	Uncharacterized protein LOC646836-like
7.74225	0.049518	7.41233	0.064795	1.26	0.0172812	XM_929793	LOC646836	Uncharacterized protein LOC646836-like
11.3769	0.008382	11.047	0.0314	1.26	0.000136706	NM_001826	CKS1B	CDC28 protein kinase regulatory subunit 1B
7.90789	0.067039	7.57819	0.027285	1.26	0.031841	NM_001013620	ALG10B	Asparagine-linked glycosylation 10, alpha-1,2-glucosyltransferase homolog B (yeast)
6.74789	0.027683	6.41832	0.02172	1.26	0.00164207	L20860	-	glycoprotein Ib (platelet), beta polypeptide
10.1865	0.029233	9.85721	0.04776	1.26	0.00334562	NM_198897	FIBP	Fibroblast growth factor (acidic) intracellular binding protein
8.93292	0.024495	8.60369	0.042635	1.26	0.00186822	NM_003016	SFRS2	Splicing factor, arginine/serine-rich 2
7.46686	0.061876	7.13796	0.0009	1.26	0.0239361	NM_013449	BAZ2A	Bromodomain adjacent to zinc finger domain, 2A
8.12385	0.050988	7.7954	0.023585	1.26	0.0134794	NM_015532	GCOM1	GRINL1A complex locus
5.32532	0.044658	4.9969	0.08961	1.26	0.0192247	NM_001134438	PHLDB2	Pleckstrin homology-like domain, family B, member 2
9.9849	0.022619	9.65656	0.02315	1.26	0.000869783	NM_138387	G6PC3	Glucose 6 phosphatase, catalytic, 3
7.4051	0.062526	7.07679	0.012455	1.26	0.0251441	NM_005775	SORBS3	Sorbin and SH3 domain containing 3
3.53214	0.034067	3.20398	0.039795	1.26	0.00440473	NR_024617	-	prostate androgen-regulated transcript 1
7.31846	0.052623	6.99045	0.07129	1.26	0.0220352	NM_006473	TAF6L	TAF6-like RNA polymerase II, p300/CBP-associated factor (PCAF)-associated factor, 65kDa
7.784	0.03947	7.45601	0.01979	1.26	0.00558953	NM_018044	NSUN5	NOL1/NOP2/Sun domain family, member 5
2.72059	0.066202	2.39276	0.048695	1.26	0.0341231	ENST00000345014	-	Novel protein gene:ENSG00000189372
6.33169	0.019789	6.0039	0.16335	1.26	0.0347989	NM_005568	LHX1	LIM homeobox 1
8.55358	0.041127	8.22599	0.018805	1.25	0.00642704	NM_024947	PHC3	Polyhomeotic homolog 3 (Drosophila)
4.10519	0.049475	3.7778	0.014975	1.25	0.0118925	BC008360	FAM113B	Family with sequence similarity 113, member B
2.74263	0.041153	2.4154	0.080595	1.25	0.014371	ENST00000383931	-	ncrna:snRNA chromosome:NCBI36:9:112171693:112171799:-1 gene:ENSG00000206658
6.69935	0.019462	6.37214	0.01297	1.25	0.000414634	NM_016074	BOLA1	BolA homolog 1 (E. coli)
10.943	0.051387	10.6158	0.028	1.25	0.0143338	NM_005659	UFD1L	Ubiquitin fusion degradation 1 like (yeast)
9.49934	0.059179	9.1722	0.040975	1.25	0.0238768	NM_002808	PSMD2	Proteasome (prosome, macropain) 26S subunit, non-ATPase, 2
9.45473	0.04468	9.12776	0.15117	1.25	0.045882	NM_023011	UPF3A	UPF3 regulator of nonsense transcripts homolog A (yeast)
7.74048	0.040873	7.41397	0.084745	1.25	0.0152865	NM_017815	HAUS4	HAUS augmin-like complex, subunit 4
6.84553	0.03782	6.51926	0.137415	1.25	0.0324388	NR_026845	-	chromosome 21 open reading frame 119
5.35528	0.062918	5.0291	0.10725	1.25	0.0470177	NM_000633	BCL2	B-cell CLL/lymphoma 2
4.57534	0.059443	4.24925	0.040195	1.25	0.0243336	ENST00000386075	-	ncrna:snoRNA_pseudogene chromosome:NCBI36:5:137987067:137987169:1 gene:ENSG00000208810
6.38147	0.038379	6.05591	0.008965	1.25	0.00489833	NM_052985	IFT122	Intraflagellar transport 122 homolog (Chlamydomonas)
8.10259	0.042548	7.77712	0.072235	1.25	0.0137924	NM_007373	SHOC2	Soc-2 suppressor of clear homolog (C. elegans)
8.36247	0.025511	8.03703	0.022445	1.25	0.00132148	NM_002904	RDBP	RD RNA binding protein
8.36247	0.025511	8.03703	0.022445	1.25	0.00132148	NM_002904	RDBP	RD RNA binding protein
8.36247	0.025511	8.03703	0.022445	1.25	0.00132148	NM_002904	RDBP	RD RNA binding protein
7.88435	0.069529	7.5591	0.039035	1.25	0.0384096	NM_032634	PIGO	Phosphatidylinositol glycan anchor biosynthesis, class O
9.79888	0.036954	9.47376	0.04459	1.25	0.00624828	NM_024844	NUP85	Nucleoporin 85kDa
9.50196	0.054253	9.1775	0.114325	1.25	0.0390681	NM_023080	C8orf33	Chromosome 8 open reading frame 33
8.16722	0.032258	7.84284	0.025885	1.25	0.00311356	NM_015444	TMEM158	Transmembrane protein 158
9.74681	0.024554	9.42297	0.06872	1.25	0.00442028	NM_005837	POP7	Processing of precursor 7, ribonuclease P/MRP subunit (S. cerevisiae)
7.51542	0.024299	7.1917	0.096685	1.25	0.00961717	NM_152629	GLIS3	GLIS family zinc finger 3
5.83881	0.031119	5.51515	0.082975	1.25	0.00937164	NM_000170	GLDC	Glycine dehydrogenase (decarboxylating)
3.08991	0.05738	2.76634	0.086775	1.25	0.0329389	ENST00000388198	-	ncrna:scRNA_pseudogene chromosome:NCBI36:9:46514878:46515161:1 gene:ENSG00000210933
7.9391	0.046676	7.61564	0.074825	1.25	0.0180596	NM_024028	PCYOX1L	Prenylcysteine oxidase 1 like
7.98308	0.067837	7.65981	0.028525	1.25	0.0351468	NM_012308	KDM2A	Lysine (K)-specific demethylase 2A
7.76413	0.073994	7.44094	0.0068	1.25	0.0436848	NM_001270	CHD1	Chromodomain helicase DNA binding protein 1
7.989	0.022753	7.66671	0.064215	1.25	0.00346341	NM_006764	IFRD2	Interferon-related developmental regulator 2
8.00886	0.037793	7.68665	0.0863	1.25	0.0141743	NM_004651	USP11	Ubiquitin specific peptidase 11
5.99519	0.024896	5.67335	0.067395	1.25	0.00444344	NM_005537	ING1	Inhibitor of growth family, member 1
9.27061	0.035004	8.94885	0.02159	1.25	0.00402187	NM_016086	STYXL1	Serine/threonine/tyrosine interacting-like 1
11.9495	0.035732	11.628	0.00375	1.25	0.00389605	NM_001552	IGFBP4	Insulin-like growth factor binding protein 4
7.85699	0.038239	7.53543	0.10319	1.25	0.0196393	NM_016466	ANKRD39	Ankyrin repeat domain 39
5.98583	0.03828	5.66431	0.01681	1.25	0.00528784	NR_024591	-	POM121 membrane glycoprotein-like 1 (rat) pseudogene
5.98583	0.03828	5.66431	0.01681	1.25	0.00528784	NR_024591	-	POM121 membrane glycoprotein-like 1 (rat) pseudogene
8.49085	0.053101	8.16935	0.02943	1.25	0.0170054	NM_133452	RAVER1	Ribonucleoprotein, PTB-binding 1
4.24625	0.055836	3.92475	0.01414	1.25	0.0188063	ENST00000364757	-	ncrna:misc_RNA chromosome:NCBI36:8:107010530:107010642:-1 gene:ENSG00000201627
8.43906	0.045942	8.11762	0.029695	1.25	0.0107391	NM_016556	PSMC3IP	PSMC3 interacting protein
9.25065	0.067611	8.9296	0.06151	1.25	0.0412442	NM_005733	KIF20A	Kinesin family member 20A
8.11416	0.066907	7.79324	0.081165	1.25	0.0456741	NM_178507	OAF	OAF homolog (Drosophila)
11.339	0.0232	11.0182	0.0676	1.25	0.0040471	NM_004515	ILF2	Interleukin enhancer binding factor 2, 45kDa
4.95089	0.050055	4.63046	0.06644	1.25	0.0199082	ENST00000364106	-	ncrna:misc_RNA chromosome:NCBI36:22:28484747:28484848:1 gene:ENSG00000200976
9.11206	0.040461	8.79163	0.090995	1.25	0.0177052	NM_014783	ARHGAP11A	Rho GTPase activating protein 11A
9.12771	0.030851	8.80741	0.08739	1.25	0.0105998	NM_017955	CDCA4	Cell division cycle associated 4
8.52477	0.027856	8.20448	0.04983	1.25	0.00346134	NM_006441	MTHFS	5,10-methenyltetrahydrofolate synthetase (5-formyltetrahydrofolate cyclo-ligase)
5.5048	0.041746	5.18465	0.0407	1.25	0.00896938	NM_018025	GPATCH1	G patch domain containing 1
6.36993	0.017096	6.04997	0.012485	1.25	0.000280345	NM_014607	UBXN4	UBX domain protein 4
9.09798	0.019461	8.77807	0.01467	1.25	0.000469604	NM_004568	SERPINB6	Serpin peptidase inhibitor, clade B (ovalbumin), member 6
8.92381	0.04665	8.60413	0.04432	1.25	0.0130606	NM_002916	RFC4	Replication factor C (activator 1) 4, 37kDa
8.4844	0.039665	8.16473	0.0985	1.25	0.0195528	NM_177439	FTSJ1	FtsJ homolog 1 (E. coli)
9.11815	0.071639	8.79853	0.03743	1.25	0.0437259	NM_017807	OSGEP	O-sialoglycoprotein endopeptidase
4.249	0.035921	3.92947	0.05202	1.25	0.00695912	BX537598	-	MRNA; cDNA DKFZp686E12119 (from clone DKFZp686E12119)
11.9287	0.031528	11.6096	0.0386	1.25	0.00379943	NM_006088	TUBB2C	Tubulin, beta 2C
7.257	0.011349	6.93792	0.117505	1.25	0.0124952	NM_016457	PRKD2	Protein kinase D2
3.04683	0.045048	2.72838	0.14088	1.25	0.0438562	NM_153325	DEFB125	Defensin, beta 125
12.1352	0.03307	11.8168	0.00805	1.25	0.00308261	NM_005321	HIST1H1E	Histone cluster 1, H1e
8.50686	0.073163	8.18847	0.020285	1.25	0.0448833	NM_020533	MCOLN1	Mucolipin 1
4.60894	0.05874	4.29056	0.035875	1.25	0.0247597	NM_000766	CYP2A13	Cytochrome P450, family 2, subfamily A, polypeptide 13
3.08183	0.055819	2.76357	0.114015	1.25	0.0432743	NM_001034842	PTCHD3	Patched domain containing 3
4.17462	0.057622	3.85637	0.048975	1.25	0.0253864	AY358209	UNQ6490	Similar to YPLR6490
10.0124	0.039779	9.69427	0.00912	1.25	0.00605056	NM_032193	RNASEH2C	Ribonuclease H2, subunit C
6.09577	0.028962	5.77766	0.06271	1.25	0.00537606	NM_144677	MGAT5B	Mannosyl (alpha-1,6-)-glycoprotein beta-1,6-N-acetyl-glucosaminyltransferase, isozyme B
2.80363	0.046923	2.48555	0.03351	1.25	0.0122659	NM_198512	DGAT2L6	Diacylglycerol O-acyltransferase 2-like 6
6.07352	0.070622	5.75568	0.009575	1.25	0.0401096	NM_198692	KRTAP10-11	Keratin associated protein 10-11
6.80851	0.034707	6.49076	0.085845	1.25	0.012698	NM_032832	LRP11	Low density lipoprotein receptor-related protein 11
7.66212	0.033355	7.34464	0.024655	1.25	0.00370968	NM_005629	SLC6A8	Solute carrier family 6 (neurotransmitter transporter, creatine), member 8
4.29539	0.054693	3.97799	0.06411	1.25	0.0251271	NM_080827	WFDC6	WAP four-disulfide core domain 6
8.85551	0.040127	8.53839	0.013465	1.25	0.00642847	NM_015354	NUP188	Nucleoporin 188kDa
11.3326	0.050306	11.0155	0.0037	1.25	0.0136918	NM_002794	PSMB2	Proteasome (prosome, macropain) subunit, beta type, 2
5.76164	0.037238	5.44461	0.011685	1.25	0.00489795	NR_026865	-	chromosome 7 open reading frame 13
8.21134	0.070737	7.89454	0.039435	1.25	0.0436257	NM_144604	ZC3H18	Zinc finger CCCH-type containing 18
4.45214	0.04958	4.13538	0.07371	1.25	0.0219422	NM_198992	SYT10	Synaptotagmin X
6.14675	0.031409	5.83009	0.04684	1.25	0.00456158	NM_182960	PRELID2	PRELI domain containing 2
5.46061	0.070948	5.14424	0.041075	1.25	0.0444263	NM_001129	AEBP1	AE binding protein 1
6.95751	0.054091	6.6412	0.05522	1.25	0.0227889	NM_015944	ATP6V0C	ATPase, H+ transporting, lysosomal 16kDa, V0 subunit c
6.4247	0.03671	6.10855	0.06315	1.25	0.00931838	NM_138477	CDAN1	Congenital dyserythropoietic anemia, type I
8.35621	0.042586	8.04007	0.063965	1.24	0.0134893	NM_006342	TACC3	Transforming, acidic coiled-coil containing protein 3
6.17232	0.036248	5.85623	0.037495	1.24	0.00586398	NM_080386	TUBA3D	Tubulin, alpha 3d
8.54569	0.028433	8.22992	0.032545	1.24	0.00257124	NM_015135	NUP205	Nucleoporin 205kDa
9.40629	0.014273	9.09067	0.022785	1.24	0.000246988	NM_021873	CDC25B	Cell division cycle 25 homolog B (S. pombe)
7.91446	0.062878	7.59887	0.06638	1.24	0.0371905	NM_007280	OIP5	Opa interacting protein 5
8.93144	0.029639	8.61586	0.0506	1.24	0.00433047	NM_006555	YKT6	YKT6 v-SNARE homolog (S. cerevisiae)
9.641	0.025371	9.32546	0.002885	1.24	0.00116006	NM_001008388	CISD2	CDGSH iron sulfur domain 2
6.48501	0.046303	6.16953	0.141165	1.24	0.0466297	NM_018463	ITFG2	Integrin alpha FG-GAP repeat containing 2
9.49019	0.016093	9.17489	0.00758	1.24	0.000212962	NM_001809	CENPA	Centromere protein A
5.37279	0.052433	5.05761	0.07544	1.24	0.0259267	NM_001012755	MCART6	Mitochondrial carrier triple repeat 6
8.6348	0.043352	8.3197	0.13984	1.24	0.0427959	NM_015957	APIP	APAF1 interacting protein
7.87961	0.074893	7.56513	0.01754	1.24	0.0494822	NM_001082486	ACD	Adrenocortical dysplasia homolog (mouse)
6.02502	0.071345	5.71082	0.020835	1.24	0.0434427	NM_198055	MZF1	Myeloid zinc finger 1
2.98473	0.073375	2.67059	0.01945	1.24	0.0469809	NM_012092	ICOS	Inducible T-cell co-stimulator
6.85808	0.025291	6.54428	0.08573	1.24	0.00837063	NM_138350	THAP3	THAP domain containing, apoptosis associated protein 3
7.94971	0.028472	7.63596	0.121315	1.24	0.0215528	NM_138300	PYGO2	Pygopus homolog 2 (Drosophila)
9.75999	0.037851	9.4465	0.04668	1.24	0.00786373	NM_007284	TWF2	Twinfilin, actin-binding protein, homolog 2 (Drosophila)
5.93662	0.040257	5.62348	0.05536	1.24	0.0106438	NM_004235	KLF4	Kruppel-like factor 4 (gut)
4.08271	0.047296	3.76961	0.092355	1.24	0.0260328	ENST00000380931	-	FLJ45139 protein
3.50532	0.043903	3.19223	0.023175	1.24	0.009679	NM_000865	HTR1E	5-hydroxytryptamine (serotonin) receptor 1E
5.14932	0.04198	4.83634	0.090445	1.24	0.0202621	ENST00000411226	-	ncrna:misc_RNA chromosome:NCBI36:13:25422842:25422959:-1 gene:ENSG00000223158
5.16813	0.043045	4.85519	0.00662	1.24	0.0084173	NM_001004354	NRARP	NOTCH-regulated ankyrin repeat protein
9.94538	0.036134	9.63256	0.101255	1.24	0.0191296	NM_177983	PPM1G	Protein phosphatase 1G (formerly 2C), magnesium-dependent, gamma isoform
6.09276	0.049033	5.78016	0.01334	1.24	0.013431	NM_024734	CLMN	Calmin (calponin-like, transmembrane)
10.0557	0.038636	9.7431	0.052565	1.24	0.0092046	NM_002014	FKBP4	FK506 binding protein 4, 59kDa
9.75404	0.058996	9.44147	0.024685	1.24	0.0253114	NM_014280	DNAJC8	DnaJ (Hsp40) homolog, subfamily C, member 8
4.68391	0.068837	4.37137	0.068135	1.24	0.048495	AK292513	C14orf37	Chromosome 14 open reading frame 37
7.01754	0.012106	6.70514	0.04365	1.24	0.000640576	NR_026811	-	hypothetical LOC80154
6.24052	0.05378	5.92821	0.094755	1.24	0.0347517	NM_001080429	KIAA1543	KIAA1543
8.01312	0.021442	7.70084	0.06794	1.24	0.00403197	NM_017449	EPHB2	EPH receptor B2
8.50358	0.033239	8.19132	0.02259	1.24	0.00380068	NM_001521	GTF3C2	General transcription factor IIIC, polypeptide 2, beta 110kDa
1.97094	0.042163	1.65959	0.110625	1.24	0.0283166	NM_002173	IFNA16	Interferon, alpha 16
4.26913	0.043465	3.95778	0.07974	1.24	0.0187412	NM_145053	UBQLNL	Ubiquilin-like
7.55427	0.04667	7.24299	0.007375	1.24	0.011358	NM_033655	CNTNAP3	Contactin associated protein-like 3
6.69226	0.046068	6.3812	0.08443	1.24	0.0226704	NM_001098622	NANOS3	Nanos homolog 3 (Drosophila)
6.68443	0.014188	6.37343	0.010645	1.24	0.000152189	NM_194272	RBPMS2	RNA binding protein with multiple splicing 2
10.0619	0.061085	9.75088	0.014325	1.24	0.0278175	NM_021227	OSTC	Oligosaccharyltransferase complex subunit
7.16866	0.026173	6.85778	0.047445	1.24	0.00312338	NM_002692	POLE2	Polymerase (DNA directed), epsilon 2 (p59 subunit)
7.6741	0.021268	7.36325	0.04897	1.24	0.00207888	NM_001004356	FGFRL1	Fibroblast growth factor receptor-like 1
9.79764	0.034793	9.48699	0.043775	1.24	0.00610857	NM_004461	FARSA	Phenylalanyl-tRNA synthetase, alpha subunit
3.62368	0.067587	3.31328	0.02284	1.24	0.038666	NM_003726	SKAP1	Src kinase associated phosphoprotein 1
9.30107	0.04814	8.99108	0.038715	1.24	0.0151146	NR_027427	-	TatD DNase domain containing 1
7.02078	0.066417	6.71084	0.016875	1.24	0.0364189	NM_005458	GABBR2	Gamma-aminobutyric acid (GABA) B receptor, 2
3.58782	0.042263	3.27841	0.1186	1.24	0.0326026	ENST00000410175	-	ncrna:misc_RNA chromosome:NCBI36:5:124714416:124714723:-1 gene:ENSG00000222107
8.79376	0.059838	8.4849	0.02348	1.24	0.027336	NM_012469	PRPF6	PRP6 pre-mRNA processing factor 6 homolog (S. cerevisiae)
6.7546	0.054688	6.44587	0.02295	1.24	0.0206636	NM_005011	NRF1	Nuclear respiratory factor 1
7.87972	0.021178	7.57121	0.02309	1.24	0.000891292	NM_020223	FAM20C	Family with sequence similarity 20, member C
5.16853	0.059646	4.86008	0.04468	1.24	0.0300231	ENST00000363193	-	ncrna:snoRNA chromosome:NCBI36:17:73907611:73907739:1 gene:ENSG00000200063
8.05047	0.028483	7.74244	0.07631	1.24	0.00825003	NM_002263	KIFC1	Kinesin family member C1
10.7323	0.007168	10.4244	0.02995	1.24	0.000132108	NM_016475	C14orf100	Chromosome 14 open reading frame 100
4.19734	0.052144	3.88945	0.032925	1.24	0.0189121	ENST00000362570	-	ncrna:misc_RNA chromosome:NCBI36:14:77357126:77357238:-1 gene:ENSG00000199440
9.6129	0.024639	9.30524	0.0816	1.24	0.00776085	NM_021640	C12orf10	Chromosome 12 open reading frame 10
7.37006	0.048666	7.06242	0.09164	1.24	0.0288057	NM_024629	MLF1IP	MLF1 interacting protein
4.24561	0.064784	3.938	0.05725	1.24	0.0408346	ENST00000411273	-	ncrna:misc_RNA chromosome:NCBI36:X:16467183:16467483:-1 gene:ENSG00000223205
7.23911	0.032876	6.93151	0.01847	1.24	0.00369893	NM_005262	GFER	Growth factor, augmenter of liver regeneration
10.827	0.03799	10.5194	0.0435	1.24	0.00810449	NM_016145	C19orf56	Chromosome 19 open reading frame 56
2.72769	0.043091	2.42064	0.03475	1.24	0.0107228	NM_001012659	ARGFX	Arginine-fifty homeobox
3.91506	0.058423	3.60868	0.07838	1.24	0.0374254	NM_001008537	KIAA2022	KIAA2022
8.1504	0.062532	7.84432	0.02273	1.24	0.0320418	NM_005732	RAD50	RAD50 homolog (S. cerevisiae)
7.03831	0.064846	6.73238	0.001355	1.24	0.0346778	NM_007255	B4GALT7	Xylosylprotein beta 1,4-galactosyltransferase, polypeptide 7 (galactosyltransferase I)
5.81778	0.008418	5.51186	0.02682	1.24	0.000122409	NM_001989	EVX1	Even-skipped homeobox 1
9.33202	0.045887	9.02628	0.011785	1.24	0.0115323	NM_003562	SLC25A11	Solute carrier family 25 (mitochondrial carrier; oxoglutarate carrier), member 11
4.36944	0.063946	4.06388	0.02388	1.24	0.0345394	NM_032827	ATOH8	Atonal homolog 8 (Drosophila)
6.41471	0.027883	6.10916	0.059795	1.24	0.00533999	NM_001137601	ZBTB42	Zinc finger and BTB domain containing 42
7.28193	0.012876	6.97668	0.06567	1.24	0.00238742	NM_012463	ATP6V0A2	ATPase, H+ transporting, lysosomal V0 subunit a2
7.76311	0.065767	7.45793	0.04684	1.24	0.0411212	NM_002224	ITPR3	Inositol 1,4,5-triphosphate receptor, type 3
7.92786	0.047063	7.62268	0.04781	1.24	0.0162203	NM_005676	RBM10	RNA binding motif protein 10
7.66304	0.0545	7.35823	0.02306	1.24	0.0213128	NM_033417	HAUS8	HAUS augmin-like complex, subunit 8
6.82035	0.048171	6.5156	0.052475	1.24	0.0182439	NR_026811	-	hypothetical LOC80154
9.9258	0.032039	9.62105	0.025675	1.24	0.00381901	NR_027280	-	SUMO1 activating enzyme subunit 1
9.05037	0.015934	8.746	0.05567	1.23	0.00186225	NM_144695	C1orf58	Chromosome 1 open reading frame 58
8.1452	0.060274	7.84092	0.06178	1.23	0.0360588	NM_020886	USP28	Ubiquitin specific peptidase 28
4.37024	0.044659	4.06602	0.097825	1.23	0.0276529	NM_001004728	OR5A1	Olfactory receptor, family 5, subfamily A, member 1
6.02449	0.044451	5.7203	0.121005	1.23	0.0379731	NM_001365	DLG4	Discs, large homolog 4 (Drosophila)
3.59355	0.04884	3.28987	0.130745	1.23	0.0488995	NM_001039397	TBC1D28	TBC1 domain family, member 28
8.61818	0.016159	8.3148	0.11542	1.23	0.0153471	NM_002915	RFC3	Replication factor C (activator 1) 3, 38kDa
9.26983	0.027893	8.96649	0.019905	1.23	0.00223867	NM_014285	EXOSC2	Exosome component 2
2.8874	0.044725	2.58411	0.037935	1.23	0.0129292	ENST00000384497	-	ncrna:snRNA chromosome:NCBI36:Y:24296477:24296640:-1 gene:ENSG00000207226
2.8874	0.044725	2.58411	0.037935	1.23	0.0129292	ENST00000384497	-	ncrna:snRNA chromosome:NCBI36:Y:24296477:24296640:-1 gene:ENSG00000207226
6.10865	0.035783	5.80535	0.075575	1.23	0.0128528	NM_005456	MAPK8IP1	Mitogen-activated protein kinase 8 interacting protein 1
8.19318	0.043987	7.89016	0.01462	1.23	0.0104103	NM_152259	C15orf42	Chromosome 15 open reading frame 42
3.15706	0.043514	2.85418	0.044325	1.23	0.0128004	NR_003680	-	ribosomal protein L13a pseudogene 17
8.49484	0.03482	8.19196	0.038405	1.23	0.00613832	NM_005480	TROAP	Trophinin associated protein (tastin)
3.60608	0.046969	3.30323	0.07344	1.23	0.0222915	ENST00000410808	-	ncrna:rRNA chromosome:NCBI36:10:127824033:127824141:-1 gene:ENSG00000222740
1.92328	0.024909	1.62054	0.10419	1.23	0.014921	ENST00000385534	-	ncrna:scRNA_pseudogene chromosome:NCBI36:7:149684774:149684857:1 gene:ENSG00000208269
8.98489	0.057364	8.68224	0.04324	1.23	0.0282606	NM_015261	NCAPD3	Non-SMC condensin II complex, subunit D3
6.97476	0.053524	6.67226	0.07991	1.23	0.0323653	NM_002593	PCOLCE	Procollagen C-endopeptidase enhancer
7.48236	0.033637	7.1802	0.099325	1.23	0.018722	NM_004153	ORC1L	Origin recognition complex, subunit 1-like (yeast)
3.02615	0.052161	2.72401	0.032505	1.23	0.0200776	NM_170610	HIST1H2BA	Histone cluster 1, H2ba
6.16174	0.037984	5.85975	0.146225	1.23	0.046612	ENST00000410893	-	ncrna:misc_RNA chromosome:NCBI36:3:196348748:196349021:-1 gene:ENSG00000222825
8.79364	0.049792	8.4918	0.01647	1.23	0.016062	NM_001048166	STIL	SCL/TAL1 interrupting locus
7.87403	0.059803	7.57226	0.056855	1.23	0.0349803	NM_001114735	BCL2A1	BCL2-related protein A1
8.63322	0.035586	8.33155	0.00807	1.23	0.00490453	NM_002669	PLRG1	Pleiotropic regulator 1 (PRL1 homolog, Arabidopsis)
7.61006	0.033078	7.30858	0.089405	1.23	0.0150949	NM_015426	WDR51A	WD repeat domain 51A
8.9833	0.038543	8.6819	0.104595	1.23	0.0250514	NM_022346	NCAPG	Non-SMC condensin I complex, subunit G
9.03709	0.046521	8.73586	0.034885	1.23	0.0145207	NM_139286	CDC26	Cell division cycle 26 homolog (S. cerevisiae)
7.60734	0.058699	7.30612	0.032065	1.23	0.0288603	NM_006295	VARS	Valyl-tRNA synthetase
7.60734	0.058699	7.30612	0.032065	1.23	0.0288603	NM_006295	VARS	Valyl-tRNA synthetase
6.85405	0.034738	6.55302	0.03976	1.23	0.00636652	NM_175063	C19orf63	Chromosome 19 open reading frame 63
7.37185	0.050031	7.07109	0.003695	1.23	0.0160513	NM_001077653	TBX20	T-box 20
8.31572	0.050596	8.01509	0.09275	1.23	0.0338118	NR_000021	-	small nucleolar RNA, C/D box 32A
8.57293	0.052286	8.27233	0.09973	1.23	0.0390068	NM_001654	ARAF	V-raf murine sarcoma 3611 viral oncogene homolog
9.93441	0.023209	9.63382	0.04624	1.23	0.00258429	NM_012117	CBX5	Chromobox homolog 5 (HP1 alpha homolog, Drosophila)
6.88229	0.065603	6.582	0.05868	1.23	0.0456298	NM_144638	KIF15	Kinesin family member 15
5.8434	0.051486	5.54324	0.063715	1.23	0.0256064	NM_024616	C3orf52	Chromosome 3 open reading frame 52
5.16569	0.053002	4.86564	0.011695	1.23	0.0197938	NM_001040619	ATF3	Activating transcription factor 3
5.63403	0.059041	5.33463	0.06928	1.23	0.0380703	NM_002286	LAG3	Lymphocyte-activation gene 3
4.10149	0.037279	3.80236	0.07147	1.23	0.0135595	NM_145658	NOX5	NADPH oxidase, EF-hand calcium binding domain 5
7.3136	0.032964	7.01477	0.05546	1.23	0.00758892	NM_001467	SLC37A4	Solute carrier family 37 (glucose-6-phosphate transporter), member 4
6.82653	0.056736	6.52777	0.09671	1.23	0.0449439	NM_177938	P4HTM	Prolyl 4-hydroxylase, transmembrane (endoplasmic reticulum)
7.82763	0.053159	7.52907	0.0861	1.23	0.0354162	NM_004292	RIN1	Ras and Rab interactor 1
7.93713	0.020812	7.63864	0.02806	1.23	0.00111102	NM_007174	CIT	Citron (rho-interacting, serine/threonine kinase 21)
3.19682	0.0238	2.89839	0.124155	1.23	0.0237353	NM_032598	SPATA22	Spermatogenesis associated 22
3.30657	0.054744	3.00816	0.095175	1.23	0.0414157	NM_024763	WDR78	WD repeat domain 78
7.22934	0.049014	6.93164	0.051255	1.23	0.0204051	NM_152622	MIER3	Mesoderm induction early response 1, family member 3
9.76402	0.036609	9.46641	0.00166	1.23	0.00562196	NM_017727	TMEM214	Transmembrane protein 214
8.11507	0.032991	7.8179	0.13161	1.23	0.0347756	NM_023008	KRI1	KRI1 homolog (S. cerevisiae)
8.03222	0.050135	7.73519	0.005525	1.23	0.0168774	NM_031942	CDCA7	Cell division cycle associated 7
7.73937	0.064127	7.44234	0.0253	1.23	0.0380806	NM_015700	NFU1	NFU1 iron-sulfur cluster scaffold homolog (S. cerevisiae)
8.30787	0.024179	8.01109	0.12261	1.23	0.0236014	NM_006556	PMVK	Phosphomevalonate kinase
6.17101	0.030032	5.87426	0.08838	1.23	0.0135399	ENST00000385363	-	ncrna:rRNA_pseudogene chromosome:NCBI36:1:235832920:235833387:1 gene:ENSG00000208098
7.17756	0.040718	6.88088	0.07323	1.23	0.0173141	NR_027001	-	hypothetical LOC388152
8.45066	0.043807	8.15411	0.009265	1.23	0.010854	NM_024658	IPO4	Importin 4
12.0125	0.019386	11.7159	0.06645	1.23	0.00405599	NM_080593	HIST1H2BK	Histone cluster 1, H2bk
11.1408	0.011202	10.8443	0.01215	1.23	8.63171e-05	NM_001826	CKS1B	CDC28 protein kinase regulatory subunit 1B
8.92717	0.029521	8.63075	0.00182	1.23	0.00259384	NM_000937	POLR2A	Polymerase (RNA) II (DNA directed) polypeptide A, 220kDa
4.76745	0.061634	4.47145	0.047085	1.23	0.0377842	NM_014440	IL1F6	Interleukin 1 family, member 6 (epsilon)
4.62743	0.02483	4.33147	0.0375	1.23	0.00249216	NM_145238	ZSCAN20	Zinc finger and SCAN domain containing 20
2.39553	0.055957	2.09967	0.05748	1.23	0.0313573	ENST00000387161	-	ncrna:Mt_tRNA_pseudogene chromosome:NCBI36:13:68181509:68181577:-1 gene:ENSG00000209896
11.0791	0.029237	10.7836	0.05745	1.23	0.00627572	NM_080391	PTP4A2	Protein tyrosine phosphatase type IVA, member 2
6.8202	0.046909	6.52482	0.062835	1.23	0.0211463	NM_025108	C16orf59	Chromosome 16 open reading frame 59
8.22415	0.036394	7.92927	0.00723	1.23	0.00575385	NM_022777	RABL5	RAB, member RAS oncogene family-like 5
6.85151	0.029194	6.5567	0.11887	1.23	0.0255756	NM_019116	UBFD1	Ubiquitin family domain containing 1
3.07356	0.029083	2.77881	0.085535	1.23	0.0124074	ENST00000411330	-	ncrna:rRNA chromosome:NCBI36:21:42514352:42514465:1 gene:ENSG00000223262
9.09557	0.041938	8.80107	0.03938	1.23	0.0119558	NM_001040022	SIRPA	Signal-regulatory protein alpha
8.45108	0.05903	8.15692	0.006455	1.23	0.029413	NM_005225	E2F1	E2F transcription factor 1
4.99766	0.062626	4.70354	0.05374	1.23	0.0417663	NM_145314	UCMA	Upper zone of growth plate and cartilage matrix associated
8.19832	0.029248	7.90432	0.061105	1.23	0.00698888	NM_130807	MOBKL2A	MOB1, Mps One Binder kinase activator-like 2A (yeast)
4.55282	0.043765	4.25892	0.06744	1.23	0.0192788	BC038406	C3orf20	Chromosome 3 open reading frame 20
6.69061	0.032885	6.39677	0.122575	1.23	0.0307483	NM_001085372	C11orf83	Chromosome 11 open reading frame 83
8.8327	0.036083	8.53896	0.030685	1.23	0.00685335	NM_016141	DYNC1LI1	Dynein, cytoplasmic 1, light intermediate chain 1
3.95575	0.039421	3.66213	0.011335	1.23	0.00786279	ENST00000362849	-	ncrna:misc_RNA chromosome:NCBI36:20:18223787:18224095:-1 gene:ENSG00000199719
11.3782	0.050761	11.0847	0.077	1.23	0.0305745	NM_030752	TCP1	T-complex 1
6.9735	0.06048	6.68011	0.083195	1.23	0.0478418	NM_014247	RAPGEF2	Rap guanine nucleotide exchange factor (GEF) 2
6.24357	0.035824	5.95038	0.036315	1.23	0.00727561	NM_003534	HIST1H3G	Histone cluster 1, H3g
9.07598	0.032422	8.78296	0.00288	1.23	0.00383252	NM_016652	CRNKL1	Crooked neck pre-mRNA splicing factor-like 1 (Drosophila)
7.31617	0.041808	7.02318	0.033505	1.23	0.0113297	NM_014737	RASSF2	Ras association (RalGDS/AF-6) domain family member 2
8.4455	0.030591	8.15256	0.060525	1.23	0.00767215	NM_020810	TRMT5	TRM5 tRNA methyltransferase 5 homolog (S. cerevisiae)
3.87357	0.037422	3.5807	0.14474	1.23	0.0492359	NM_013427	ARHGAP6	Rho GTPase activating protein 6
2.0679	0.037066	1.77504	0.140345	1.23	0.0458818	ENST00000391157	-	ncrna:snRNA chromosome:NCBI36:1:90491602:90491705:-1 gene:ENSG00000212459
5.48566	0.022909	5.1928	0.001175	1.23	0.00104101	NM_001099220	ZNF862	Zinc finger protein 862
10.9781	0.01123	10.6854	0.0466	1.22	0.00090618	NM_002212	EIF6	Eukaryotic translation initiation factor 6
7.93056	0.047719	7.63783	0.027315	1.22	0.016368	NM_006461	SPAG5	Sperm associated antigen 5
10.9119	0.019995	10.6192	0.00285	1.22	0.000621894	NM_017900	CCNL2	Cyclin L2
5.26034	0.033711	4.96772	0.005825	1.22	0.00447156	NM_001586	TEX28	Testis expressed 28
5.26034	0.033711	4.96772	0.005825	1.22	0.00447156	NM_001586	TEX28	Testis expressed 28
7.16659	0.04639	6.87397	0.093245	1.22	0.0313542	NR_027001	-	hypothetical LOC388152
10.7304	0.05705	10.4378	0.06325	1.22	0.0357254	NM_000175	GPI	Glucose phosphate isomerase
4.55281	0.038464	4.26037	0.03945	1.22	0.00947993	AK129695	C16orf47	Chromosome 16 open reading frame 47
6.46395	0.057961	6.17159	0.07523	1.22	0.0410905	NM_152641	ARID2	AT rich interactive domain 2 (ARID, RFX-like)
7.93208	0.039832	7.63975	0.01238	1.22	0.00831646	NM_018151	RIF1	RAP1 interacting factor homolog (yeast)
7.76	0.023206	7.46777	0.075675	1.22	0.00727163	NM_183401	RNF14	Ring finger protein 14
10.4303	0.030102	10.1381	0.0538	1.22	0.00639181	NM_016045	SLMO2	Slowmo homolog 2 (Drosophila)
5.57936	0.036259	5.28735	0.03075	1.22	0.00711277	ENST00000365547	-	ncrna:misc_RNA chromosome:NCBI36:5:132308933:132309045:1 gene:ENSG00000202417
8.29355	0.064267	8.00163	0.044455	1.22	0.0434921	NM_139286	CDC26	Cell division cycle 26 homolog (S. cerevisiae)
8.3088	0.028902	8.01692	0.10764	1.22	0.0208426	NM_139242	MTFMT	Mitochondrial methionyl-tRNA formyltransferase
9.35926	0.028823	9.06751	0.07576	1.22	0.0100267	NM_022908	NT5DC2	5-nucleotidase domain containing 2
8.96233	0.039921	8.67079	0.08083	1.22	0.019903	NM_031206	LAS1L	LAS1-like (S. cerevisiae)
5.52531	0.04196	5.23381	0.107445	1.22	0.0328561	NM_001018072	BTBD11	BTB (POZ) domain containing 11
9.34083	0.039711	9.0494	0.01623	1.22	0.00848788	NM_025196	GRPEL1	GrpE-like 1, mitochondrial (E. coli)
4.36349	0.031013	4.0723	0.120015	1.22	0.0286255	NM_053017	ART5	ADP-ribosyltransferase 5
11.3651	0.047229	11.0741	0.0239	1.22	0.0158332	NM_002799	PSMB7	Proteasome (prosome, macropain) subunit, beta type, 7
6.79739	0.063535	6.50697	0.019365	1.22	0.0390124	NM_019102	HOXA5	Homeobox A5
2.68136	0.038544	2.39104	0.028585	1.22	0.00860918	ENST00000384115	-	ncrna:snRNA chromosome:NCBI36:10:23116328:23116434:1 gene:ENSG00000206842
2.55992	0.041734	2.26967	0.1179	1.22	0.0384982	ENST00000366486	-	cdna:pseudogene chromosome:NCBI36:1:245849007:245850487:1 gene:ENSG00000198452
6.47468	0.043262	6.1845	0.01781	1.22	0.0116031	BC021178	C20orf141	Chromosome 20 open reading frame 141
5.82901	0.049561	5.53908	0.07891	1.22	0.030791	NM_152658	THAP8	THAP domain containing 8
4.09995	0.064231	3.81006	0.01593	1.22	0.0401975	NM_153235	TXLNB	Taxilin beta
6.48182	0.039376	6.19211	0.10105	1.22	0.0276138	NM_032129	PLEKHN1	Pleckstrin homology domain containing, family N member 1
6.83194	0.030493	6.54275	0.076385	1.22	0.0115069	NR_026811	-	hypothetical LOC80154
7.79362	0.035688	7.50454	0.02301	1.22	0.00641798	NM_017799	C14orf101	Chromosome 14 open reading frame 101
7.02522	0.044303	6.73614	0.06216	1.22	0.0195262	NM_152903	KBTBD6	Kelch repeat and BTB (POZ) domain containing 6
4.40514	0.052907	4.11611	0.056015	1.22	0.0287557	NM_000877	IL1R1	Interleukin 1 receptor, type I
8.64649	0.026898	8.35782	0.055265	1.22	0.0053924	NM_080821	C20orf108	Chromosome 20 open reading frame 108
9.31932	0.029393	9.03071	0.05686	1.22	0.00680507	NM_014315	KLHDC2	Kelch domain containing 2
8.94321	0.014241	8.65471	0.103495	1.22	0.0125109	NM_016292	TRAP1	TNF receptor-associated protein 1
8.32307	0.047876	8.03463	0.046915	1.22	0.0203131	NM_013382	POMT2	Protein-O-mannosyltransferase 2
3.59513	0.06169	3.30685	0	1.22	0.0356877	NM_001034173	ALDH1L2	Aldehyde dehydrogenase 1 family, member L2
5.33537	0.043152	5.04715	0.007775	1.22	0.0113266	BC044799	C4orf21	Chromosome 4 open reading frame 21
5.23742	0.048317	4.94924	0.00088	1.22	0.0164548	NM_175054	HIST4H4	Histone cluster 4, H4
4.82245	0.032223	4.53439	0.038165	1.22	0.00582588	NM_000040	APOC3	Apolipoprotein C-III
10.3776	0.041701	10.0896	0.0154	1.22	0.0103896	NM_001545	ICT1	Immature colon carcinoma transcript 1
9.87315	0.052665	9.58511	0.067065	1.22	0.0318192	NM_002816	PSMD12	Proteasome (prosome, macropain) 26S subunit, non-ATPase, 12
11.3058	0.052437	11.0179	0.0164	1.22	0.0221322	NM_002266	KPNA2	Karyopherin alpha 2 (RAG cohort 1, importin alpha 1)
7.62793	0.025644	7.34033	0.02539	1.22	0.00227416	NM_033222	PSIP1	PC4 and SFRS1 interacting protein 1
8.18155	0.030367	7.89402	0.00359	1.22	0.00323529	NM_032940	POLR2C	Polymerase (RNA) II (DNA directed) polypeptide C, 33kDa
9.96677	0.034693	9.67926	0.039115	1.22	0.00739239	NM_016494	RNF181	Ring finger protein 181
5.23691	0.042479	4.94965	0.09881	1.22	0.0308132	NM_173477	USH1G	Usher syndrome 1G (autosomal recessive)
8.99346	0.036367	8.70622	0.049745	1.22	0.0100511	NM_181471	RFC2	Replication factor C (activator 1) 2, 40kDa
7.08998	0.031976	6.80278	0.04096	1.22	0.00606217	ENST00000365606	-	ncrna:misc_RNA chromosome:NCBI36:16:30372819:30372919:-1 gene:ENSG00000202476
5.37724	0.042316	5.09008	0.07512	1.22	0.0215189	NM_004727	SLC24A1	Solute carrier family 24 (sodium/potassium/calcium exchanger), member 1
2.37475	0.045395	2.08763	0.002435	1.22	0.0135243	ENST00000410640	-	ncrna:misc_RNA chromosome:NCBI36:8:42855536:42855837:1 gene:ENSG00000222572
8.84034	0.026205	8.55325	0.010975	1.22	0.00197275	NM_000143	FH	Fumarate hydratase
2.77354	0.032272	2.48646	0.11632	1.22	0.0290143	NM_030933	C1orf14	Chromosome 1 open reading frame 14
7.44255	0.024513	7.15551	0.08126	1.22	0.00973993	NM_005078	TLE3	Transducin-like enhancer of split 3 (E(sp1) homolog, Drosophila)
11.3091	0.052591	11.0222	0.0109	1.22	0.0222802	NM_002266	KPNA2	Karyopherin alpha 2 (RAG cohort 1, importin alpha 1)
5.05079	0.056046	4.76396	0.088055	1.22	0.0453863	NM_031474	NRIP2	Nuclear receptor interacting protein 2
7.30525	0.051443	7.01848	0.02352	1.22	0.0217088	NM_020457	THAP11	THAP domain containing 11
3.31863	0.054356	3.03189	0.02772	1.22	0.0262219	ENST00000411245	-	ncrna:rRNA chromosome:NCBI36:13:107751561:107751680:-1 gene:ENSG00000223177
9.24704	0.065084	8.96036	0.051615	1.22	0.0491292	NM_018093	WDR74	WD repeat domain 74
6.52553	0.026755	6.23892	0.02542	1.22	0.00264276	NM_133267	GSX2	GS homeobox 2
4.9166	0.049773	4.63016	0.05364	1.22	0.0246341	NM_018990	SASH3	SAM and SH3 domain containing 3
9.54626	0.037432	9.25983	0.04489	1.22	0.0101707	NM_197964	LUC7L2	LUC7-like 2 (S. cerevisiae)
5.4438	0.040311	5.15761	0.030345	1.22	0.0106233	NM_198276	TMEM17	Transmembrane protein 17
2.27254	0.026631	1.98642	0.049975	1.22	0.00472401	NM_080868	ASB17	Ankyrin repeat and SOCS box-containing 17
2.89757	0.042257	2.61147	0.13083	1.22	0.0487816	NM_002785	PSG11	Pregnancy specific beta-1-glycoprotein 11
10.8368	0.018018	10.5508	0.09625	1.22	0.0115872	NM_022842	CDCP1	CUB domain containing protein 1
6.83244	0.030287	6.54658	0.07703	1.22	0.0120168	NR_026811	-	hypothetical LOC80154
6.80666	0.039588	6.52086	0.109245	1.22	0.0330563	NM_013301	CCDC106	Coiled-coil domain containing 106
8.1323	0.031352	7.8465	0.101075	1.22	0.0212687	NM_000156	GAMT	Guanidinoacetate N-methyltransferase
2.272	0.060435	1.98636	0.07624	1.22	0.0487502	ENST00000363880	-	ncrna:misc_RNA chromosome:NCBI36:18:17558078:17558188:1 gene:ENSG00000200750
10.4476	0.026499	10.1624	0.0497	1.22	0.00469102	NM_006429	CCT7	Chaperonin containing TCP1, subunit 7 (eta)
8.11468	0.06326	7.82973	0.03834	1.22	0.0434601	NM_020216	RNPEP	Arginyl aminopeptidase (aminopeptidase B)
3.85431	0.066296	3.56943	0.038905	1.22	0.0495222	NM_001083539	KIR3DS1	Killer cell immunoglobulin-like receptor, three domains, short cytoplasmic tail, 1
12.0232	0.022395	11.7386	0.00905	1.22	0.00111912	NM_001024226	ARF1	ADP-ribosylation factor 1
6.16547	0.030451	5.88119	0.05422	1.22	0.00731198	NM_005672	PSCA	Prostate stem cell antigen
7.67249	0.023862	7.38826	0.039535	1.22	0.0027652	NM_002419	MAP3K11	Mitogen-activated protein kinase kinase kinase 11
7.46864	0.054928	7.1844	0.017005	1.22	0.0267171	NM_014946	SPAST	Spastin
7.78243	0.015158	7.49857	0.031635	1.22	0.000684321	NM_031965	GSG2	Germ cell associated 2 (haspin)
2.41402	0.049044	2.1306	0.01264	1.22	0.0185942	NM_032944	STK31	Serine/threonine kinase 31
2.72207	0.050944	2.4387	0.044115	1.22	0.0249798	NM_001042784	CCDC158	Coiled-coil domain containing 158
5.27988	0.040711	4.99654	0.00621	1.22	0.00980034	NM_006686	ACTL7B	Actin-like 7B
7.42908	0.046182	7.14604	0.03317	1.22	0.0172353	NM_012318	LETM1	Leucine zipper-EF-hand containing transmembrane protein 1
6.36383	0.053636	6.08078	0.037445	1.22	0.0277009	NM_174963	ST3GAL3	ST3 beta-galactoside alpha-2,3-sialyltransferase 3
9.82095	0.028839	9.53808	0.08302	1.22	0.0132891	NM_004521	KIF5B	Kinesin family member 5B
6.75074	0.036511	6.46788	0.079265	1.22	0.018066	NM_015270	ADCY6	Adenylate cyclase 6
6.30969	0.028456	6.027	0.056575	1.22	0.00678166	NM_030934	C1orf25	Chromosome 1 open reading frame 25
3.75256	0.055243	3.46992	0.03987	1.22	0.0307378	ENST00000410734	-	ncrna:snoRNA chromosome:NCBI36:10:28736975:28737186:-1 gene:ENSG00000222666
7.02645	0.034873	6.744	0.015825	1.22	0.00604956	NM_002691	POLD1	Polymerase (DNA directed), delta 1, catalytic subunit 125kDa
7.26109	0.049767	6.97867	0.0861	1.22	0.0365692	NM_006293	TYRO3	TYRO3 protein tyrosine kinase
8.08597	0.023226	7.80366	0.084815	1.22	0.0107079	NM_002883	RANGAP1	Ran GTPase activating protein 1
7.17776	0.043171	6.89549	0.12214	1.22	0.0462507	NM_013440	PILRB	Paired immunoglobin-like type 2 receptor beta
4.69576	0.050102	4.41364	0.057135	1.22	0.0271939	NM_138328	RHBDL3	Rhomboid, veinlet-like 3 (Drosophila)
2.68189	0.054811	2.39981	0.07364	1.22	0.0396198	NM_020124	IFNK	Interferon, kappa
6.77414	0.04262	6.49211	0.03287	1.22	0.0136094	NM_014521	SH3BP4	SH3-domain binding protein 4
8.70871	0.046223	8.42676	0.07662	1.22	0.0281003	NM_014321	ORC6L	Origin recognition complex, subunit 6 like (yeast)
9.41887	0.019867	9.1372	0.07656	1.22	0.00712846	NM_006246	PPP2R5E	Protein phosphatase 2, regulatory subunit B, epsilon isoform
2.03829	0.026433	1.75705	0.05578	1.22	0.00579264	ENST00000363041	-	ncrna:misc_RNA chromosome:NCBI36:5:24946460:24946561:1 gene:ENSG00000199911
6.81965	0.028745	6.53856	0.14251	1.22	0.0446649	NM_198690	KRTAP10-9	Keratin associated protein 10-9
6.69822	0.034622	6.41731	0.03614	1.21	0.00761816	NM_017777	MKS1	Meckel syndrome, type 1
2.27187	0.034579	1.99114	0.070035	1.21	0.0140174	NM_001008777	FBXO47	F-box protein 47
7.29941	0.039962	7.01886	0.04047	1.21	0.0123955	NM_015235	CSTF2T	Cleavage stimulation factor, 3 pre-RNA, subunit 2, 64kDa, tau variant
7.04538	0.034018	6.76487	0.024715	1.21	0.00621014	NM_012415	RAD54B	RAD54 homolog B (S. cerevisiae)
7.44208	0.031031	7.16161	0.12597	1.21	0.0357683	NM_018346	RSAD1	Radical S-adenosyl methionine domain containing 1
7.72072	0.04121	7.44038	0.04362	1.21	0.01411	NM_004756	NUMBL	Numb homolog (Drosophila)-like
9.29751	0.045912	9.01732	0.073765	1.21	0.0272282	NM_006201	PCTK1	PCTAIRE protein kinase 1
10.4029	0.032681	10.1227	0.03795	1.21	0.00667965	NM_006000	TUBA4A	Tubulin, alpha 4a
7.11273	0.057559	6.83273	0.0352	1.21	0.0346318	NM_173647	RNF149	Ring finger protein 149
10.1085	0.066637	9.82859	0.011585	1.21	0.0491387	NM_016143	NSFL1C	NSFL1 (p97) cofactor (p47)
8.32124	0.053966	8.04169	0.01167	1.21	0.0262941	NM_000436	OXCT1	3-oxoacid CoA transferase 1
5.59099	0.057865	5.3115	0.05482	1.21	0.0398148	BC047942	-	CDNA clone IMAGE:5200632
3.35154	0.036173	3.07228	0.08314	1.21	0.0198914	NM_173077	CPO	Carboxypeptidase O
7.48952	0.024652	7.21037	0.030925	1.21	0.00255484	NM_001012503	KRTAP5-7	Keratin associated protein 5-7
3.27546	0.032516	2.99636	0.07667	1.21	0.0145819	ENST00000388229	-	ncrna:snRNA_pseudogene chromosome:NCBI36:8:49383043:49383142:-1 gene:ENSG00000210964
7.91085	0.027913	7.6319	0.090305	1.21	0.015842	NM_018046	AGGF1	Angiogenic factor with G patch and FHA domains 1
4.66125	0.043085	4.38242	0.08494	1.21	0.028279	NM_002381	MATN3	Matrilin 3
9.19182	0.048618	8.91324	0.056505	1.21	0.0260255	NM_004990	MARS	Methionyl-tRNA synthetase
2.23297	0.034471	1.95444	0.06555	1.21	0.0131059	NM_025063	C1orf129	Chromosome 1 open reading frame 129
7.32454	0.031824	7.04604	0.02991	1.21	0.00551731	NM_033397	ITPRIP	Inositol 1,4,5-triphosphate receptor interacting protein
7.39932	0.05455	7.12082	0.067175	1.21	0.0383679	NM_031288	INO80B	INO80 complex subunit B
6.61413	0.051749	6.33565	0.002065	1.21	0.0230197	NM_080742	B3GAT2	Beta-1,3-glucuronyltransferase 2 (glucuronosyltransferase S)
5.90438	0.04214	5.62621	0.01344	1.21	0.0120246	NM_015102	NPHP4	Nephronophthisis 4
3.74586	0.045732	3.46772	0.05024	1.21	0.0208434	NM_004675	DIRAS3	DIRAS family, GTP-binding RAS-like 3
7.55797	0.048704	7.27983	0.08601	1.21	0.0366376	NM_138400	NOM1	Nucleolar protein with MIF4G domain 1
7.47398	0.034098	7.19599	0.127215	1.21	0.0406235	NM_004965	HMGN1	High-mobility group nucleosome binding domain 1
3.342	0.024188	3.06402	0.13876	1.21	0.0396035	NM_001002917	OR8D1	Olfactory receptor, family 8, subfamily D, member 1
8.51103	0.011885	8.23313	0.04961	1.21	0.00139568	NM_015942	MTERFD1	MTERF domain containing 1
6.81017	0.03888	6.53256	0.103075	1.21	0.0319663	NM_001143688	DIS3L	DIS3 mitotic control homolog (S. cerevisiae)-like
7.05797	0.049604	6.78045	0.009285	1.21	0.0204934	NM_178428	LCE2A	Late cornified envelope 2A
8.59151	0.034658	8.31408	0.015175	1.21	0.00628286	NM_006591	-	CDNA, FLJ79200 complete cds, highly similar to DNA polymerase subunit delta 3
2.80317	0.06156	2.52575	0.001105	1.21	0.0397713	ENST00000384425	-	ncrna:snRNA chromosome:NCBI36:18:47064101:47064264:-1 gene:ENSG00000207154
7.47516	0.022195	7.19826	0.04653	1.21	0.00320856	NM_012104	BACE1	Beta-site APP-cleaving enzyme 1
7.7779	0.036231	7.5011	0.12514	1.21	0.0421244	NM_003324	TULP3	Tubby like protein 3
3.16646	0.057353	2.88979	0.026225	1.21	0.0341418	NM_001008723	CCDC147	Coiled-coil domain containing 147
9.16074	0.031147	8.88408	0.04756	1.21	0.00735838	NM_005573	LMNB1	Lamin B1
7.77138	0.063849	7.49491	0.022735	1.21	0.0460831	NM_025263	PRR3	Proline rich 3
11.4604	0.028094	11.184	0.052	1.21	0.00636884	NM_000365	TPI1	Triosephosphate isomerase 1
4.70822	0.056384	4.43234	0.07509	1.21	0.045663	NM_001841	CNR2	Cannabinoid receptor 2 (macrophage)
4.26533	0.050755	3.98949	0.02919	1.21	0.0242911	NM_198053	CD247	CD247 molecule
8.16095	0.01814	7.88518	0.001015	1.21	0.000534134	NM_006777	ZBTB33	Zinc finger and BTB domain containing 33
6.95235	0.046617	6.67682	0.036565	1.21	0.0199005	NM_001144026	NDOR1	NADPH dependent diflavin oxidoreductase 1
6.57783	0.028776	6.30231	0.02186	1.21	0.00366122	NM_079837	BANP	BTG3 associated nuclear protein
4.88761	0.030254	4.61243	0.01762	1.21	0.00413055	NM_152519	C2orf67	Chromosome 2 open reading frame 67
2.65173	0.049868	2.37663	0.104785	1.21	0.0492395	ENST00000411195	-	ncrna:misc_RNA chromosome:NCBI36:13:98122235:98122530:1 gene:ENSG00000223127
5.70065	0.062684	5.42576	0.01609	1.21	0.0437829	NM_001135655	LY6H	Lymphocyte antigen 6 complex, locus H
2.54795	0.049154	2.27337	0.00233	1.21	0.0204142	NM_003034	ST8SIA1	ST8 alpha-N-acetyl-neuraminide alpha-2,8-sialyltransferase 1
5.40864	0.054048	5.13412	0.0074	1.21	0.0277651	ENST00000388053	-	ncrna:snRNA_pseudogene chromosome:NCBI36:16:74879028:74879142:1 gene:ENSG00000210788
5.91168	0.039255	5.63722	0.100135	1.21	0.0320238	NM_153498	CAMK1D	Calcium/calmodulin-dependent protein kinase ID
7.31837	0.031706	7.04403	0.01209	1.21	0.00468204	NM_004584	RAD9A	RAD9 homolog A (S. pombe)
5.39813	0.063266	5.12413	0.003025	1.21	0.0447054	NM_001528	HGFAC	HGF activator
4.37945	0.02903	4.1055	0.091025	1.21	0.0179465	ENST00000388001	-	ncrna:scRNA_pseudogene chromosome:NCBI36:7:51751877:51752120:1 gene:ENSG00000210736
6.74479	0.033931	6.47091	0.075235	1.21	0.0162741	NM_003509	HIST1H2AI	Histone cluster 1, H2ai
9.8029	0.030859	9.5293	0.10597	1.21	0.0264771	NM_014042	C11orf51	Chromosome 11 open reading frame 51
9.66311	0.029584	9.38963	0.004795	1.21	0.00354677	NM_001211	BUB1B	Budding uninhibited by benzimidazoles 1 homolog beta (yeast)
6.59245	0.043055	6.31898	0.0476	1.21	0.0181544	NM_024644	C14orf169	Chromosome 14 open reading frame 169
7.07965	0.049402	6.80642	0.014995	1.21	0.0215962	NM_001031617	COX19	COX19 cytochrome c oxidase assembly homolog (S. cerevisiae)
9.60081	0.040529	9.32779	0.10684	1.21	0.0377707	NM_138459	NUS1	Nuclear undecaprenyl pyrophosphate synthase 1 homolog (S. cerevisiae)
8.04332	0.060002	7.77035	0.03299	1.21	0.0415823	NM_014181	HSPC159	Galectin-related protein
6.91238	0.055205	6.63988	0.000575	1.21	0.0301966	AK125308	LOC100129484	Hypothetical LOC100129484
7.46196	0.061656	7.18969	0.00921	1.21	0.0424536	NM_003993	CLK2	CDC-like kinase 2
3.96443	0.052066	3.69218	0.00957	1.21	0.025441	NM_152774	TMEM196	Transmembrane protein 196
11.2165	0.028782	10.9443	0.02935	1.21	0.00433669	NM_001037808	EIF3C	Eukaryotic translation initiation factor 3, subunit C
11.2165	0.028782	10.9443	0.02935	1.21	0.00433669	NM_001037808	EIF3C	Eukaryotic translation initiation factor 3, subunit C
9.87137	0.026661	9.59929	0.01103	1.21	0.00257011	NM_005319	HIST1H1C	Histone cluster 1, H1c
4.76545	0.047616	4.49363	0.05498	1.21	0.0262363	ENST00000364798	-	ncrna:misc_RNA chromosome:NCBI36:18:45651923:45652034:-1 gene:ENSG00000201668
7.09864	0.031568	6.82702	0.108725	1.21	0.0292535	NM_014595	NT5C	5, 3-nucleotidase, cytosolic
6.43567	0.038961	6.16433	0.01345	1.21	0.0100502	NM_001048212	CEMP1	Cementum protein 1
2.28668	0.033923	2.01543	0.086865	1.21	0.0211112	ENST00000364403	-	ncrna:snRNA chromosome:NCBI36:1:22210065:22210168:1 gene:ENSG00000201273
3.65898	0.04162	3.38783	0.00073	1.21	0.0122224	NM_016335	PRODH	Proline dehydrogenase (oxidase) 1
9.44339	0.046221	9.17238	0.037615	1.21	0.0206604	NM_013417	IARS	Isoleucyl-tRNA synthetase
7.47908	0.043022	7.20838	0.015675	1.21	0.014271	NM_001008701	LPHN1	Latrophilin 1
5.08704	0.050316	4.81639	0.087365	1.21	0.043004	ENST00000411075	-	ncrna:misc_RNA chromosome:NCBI36:5:5179159:5179450:1 gene:ENSG00000223007
8.01215	0.014102	7.74152	0.00512	1.21	0.000224457	NM_001321	CSRP2	Cysteine and glycine-rich protein 2
5.86796	0.044072	5.59738	0.056785	1.21	0.0223074	NM_016533	NINJ2	Ninjurin 2
9.05489	0.041745	8.78431	0.05961	1.21	0.0202411	NM_018170	RPRD1A	Regulation of nuclear pre-mRNA domain containing 1A
4.78756	0.057372	4.51698	0.03143	1.21	0.0373551	ENST00000405400	-	hypothetical protein FLJ25694
3.73823	0.048318	3.46776	0.00206	1.21	0.0202731	NM_030642	APOL5	Apolipoprotein L, 5
8.24905	0.039663	7.9787	0.04429	1.21	0.0144376	NM_138455	CTHRC1	Collagen triple helix repeat containing 1
4.93651	0.030539	4.66623	0.13924	1.21	0.0491962	ENST00000388577	-	ncrna:scRNA_pseudogene chromosome:NCBI36:X:71335288:71335625:1 gene:ENSG00000211312
5.08786	0.031457	4.81761	0.048565	1.21	0.00836791	8070930	-
5.02945	0.049223	4.75921	0.04722	1.21	0.027076	NM_014589	PLA2G2E	Phospholipase A2, group IIE
3.69723	0.031423	3.42728	0.09044	1.21	0.0206188	ENST00000372910	-	chromosome 20 open reading frame 62
2.01042	0.039842	1.74059	0.11034	1.21	0.0402902	ENST00000390964	-	ncrna:snoRNA chromosome:NCBI36:1:118032766:118032887:-1 gene:ENSG00000212266
7.78608	0.042569	7.51644	0.02561	1.21	0.0148419	NM_015946	PELO	Pelota homolog (Drosophila)
7.87552	0.038342	7.60601	0.06962	1.21	0.0196964	NM_001100418	C19orf60	Chromosome 19 open reading frame 60
2.81843	0.041324	2.54901	0.02726	1.21	0.0137297	ENST00000362973	-	ncrna:rRNA chromosome:NCBI36:12:36841535:36841651:-1 gene:ENSG00000199843
5.16717	0.035677	4.89822	0.06331	1.2	0.0152248	NM_001114759	ZNF683	Zinc finger protein 683
2.12895	0.037743	1.86035	0.078175	1.2	0.0223032	ENST00000390974	-	ncrna:rRNA chromosome:NCBI36:9:108645851:108645968:-1 gene:ENSG00000212276
8.06677	0.020665	7.79817	0.024395	1.2	0.00145344	NM_001127	AP1B1	Adaptor-related protein complex 1, beta 1 subunit
7.8259	0.036088	7.55742	0.02999	1.2	0.00933065	NM_024339	THOC6	THO complex 6 homolog (Drosophila)
7.21038	0.033092	6.94191	0.0515	1.2	0.0102985	NM_052859	RFT1	RFT1 homolog (S. cerevisiae)
6.72601	0.019014	6.45779	0.14013	1.2	0.041302	NM_025010	KLHL18	Kelch-like 18 (Drosophila)
5.26093	0.020278	4.99308	0.02498	1.2	0.00141084	NM_001586	TEX28	Testis expressed 28
5.85163	0.041585	5.58409	0.11476	1.2	0.0465295	NM_005039	PRB1	Proline-rich protein BstNI subfamily 1
7.9882	0.054729	7.7208	0.05451	1.2	0.0392669	NR_024060	-	family with sequence similarity 27, member A
6.06097	0.033512	5.79357	0.10592	1.2	0.0311257	NM_019885	CYP26B1	Cytochrome P450, family 26, subfamily B, polypeptide 1
7.96331	0.045028	7.69602	0.013465	1.2	0.0171285	NM_021064	HIST1H2AG	Histone cluster 1, H2ag
6.44636	0.059008	6.17915	0.014495	1.2	0.0397931	NM_199181	C20orf117	Chromosome 20 open reading frame 117
4.69731	0.048831	4.43017	0.02594	1.2	0.0234957	ENST00000332397	-	speedy homolog E3 (Xenopus laevis)
2.20155	0.045918	1.93443	0.053265	1.2	0.0247822	ENST00000388035	-	ncrna:snoRNA_pseudogene chromosome:NCBI36:2:16243953:16244045:1 gene:ENSG00000210770
4.53221	0.051631	4.26518	0.04063	1.2	0.0304214	NR_026780	-	chromosome 6 open reading frame 208
9.86886	0.024048	9.60213	0.02523	1.2	0.00244699	NM_004111	FEN1	Flap structure-specific endonuclease 1
7.66757	0.013641	7.40096	0.1214	1.2	0.0258729	NM_001098536	USP5	Ubiquitin specific peptidase 5 (isopeptidase T)
6.21672	0.041274	5.95026	0.09101	1.2	0.0329404	NM_032871	RELT	RELT tumor necrosis factor receptor
6.77189	0.053598	6.50565	0.04515	1.2	0.0351307	NM_020649	CBX8	Chromobox homolog 8 (Pc class homolog, Drosophila)
5.4237	0.036217	5.15773	0.026615	1.2	0.00938158	AK296222	-	CDNA FLJ54498 complete cds, weakly similar to Mucin-like protein 1 precursor
3.82687	0.052386	3.5609	0.055155	1.2	0.0358877	AF090909	-	Homo sapiens clone HQ0255 PRO0255 mRNA, complete cds.
8.54004	0.046853	8.27416	0.032365	1.2	0.0219441	NM_016426	GTSE1	G-2 and S-phase expressed 1
8.35527	0.045279	8.08958	0.082765	1.2	0.0350115	NM_002755	MAP2K1	Mitogen-activated protein kinase kinase 1
2.99011	0.036182	2.7248	0.12161	1.2	0.045052	ENST00000387277	-	ncrna:snRNA_pseudogene chromosome:NCBI36:9:991863:991963:-1 gene:ENSG00000210012
7.363	0.038697	7.09772	0.08112	1.2	0.0255314	NM_003580	NSMAF	Neutral sphingomyelinase (N-SMase) activation associated factor
7.98002	0.029276	7.71518	0.036995	1.2	0.00584695	NM_002263	KIFC1	Kinesin family member C1
7.26815	0.019344	7.0035	0.047705	1.2	0.00301287	NM_006478	GAS2L1	Growth arrest-specific 2 like 1
10.0763	0.035268	9.81204	0.10306	1.2	0.0326118	NM_006838	METAP2	Methionyl aminopeptidase 2
8.44994	0.016294	8.1858	0.08705	1.2	0.0107874	NM_005526	HSF1	Heat shock transcription factor 1
7.78744	0.008955	7.52342	0.047315	1.2	0.00116837	NM_015140	TTLL12	Tubulin tyrosine ligase-like family, member 12
8.57689	0.035202	8.31311	0.0839	1.2	0.0231603	NM_012164	FBXW2	F-box and WD repeat domain containing 2
6.99875	0.060524	6.73506	0.036425	1.2	0.0477961	NM_019103	ZMAT5	Zinc finger, matrin type 5
6.7888	0.015934	6.52537	0.06864	1.2	0.00551395	AK291684	LOC80154	Hypothetical LOC80154
6.10514	0.030045	5.84203	0.12573	1.2	0.0420013	NM_033017	TRIM4	Tripartite motif-containing 4
Total	1564
