# Supplementary material for: Ago1 Interacts with RNA Polymerase II and Binds to the Promoters of Actively Transcribed Genes in Human Cancer Cells
Source: PLoS Genet. 2013 Sep 26;9(9):e1003821. doi: 10.1371/journal.pgen.1003821 (PMC3784563; doi:10.1371/journal.pgen.1003821)
Supplement: Table S15 — Enrichment of Ago1 bound/regulated genes in Cancer Pathways. (XLSX) [file pgen.1003821.s027.xlsx]

## Sheet: Table S15
Supplemental Table 15: Enrichment of Ago1 bound/regulated genes in Cancer Pathways
Total genes in "Cancer Pathways": 329		Genes changed by Ago1 knockdown: 70 (21.3% of all genes in pathways)
AbGs-5kb: 231 (70.2% of all genes in pathways)
AbGs-1kb: 182 (55.3% of all genes in pathways)
Gene Symbol	Gene Name	Ensembl ID	ENTREZ ID	AbG-5kb*?	AbG-1kb†?	ArG#?
BCL2	B-cell CLL/lymphoma 2	ENSG00000171791	596	Yes	Yes	Yes
BAX	BCL2-associated X protein	ENSG00000087088	581	Yes	Yes
BAD	BCL2-associated agonist of cell death	ENSG00000002330	572	Yes	Yes
BCL2L1	BCL2-like 1	ENSG00000171552	598	Yes	Yes
BID	BH3 interacting domain death agonist	ENSG00000015475	637			Yes
CTBP1	C-terminal binding protein 1	ENSG00000159692	1487	Yes	Yes
CTBP2	C-terminal binding protein 2	ENSG00000175029	1488	Yes	Yes
CEBPA	CCAAT/enhancer binding protein (C/EBP) alpha	ENSG00000184771	1050
CKS1B	CDC28 protein kinase regulatory subunit 1B	ENSG00000173207	1163	Yes	Yes	Yes
CREBBP	CREB binding protein	ENSG00000005339	1387	Yes	Yes
CBL	Cas-Br-M (murine) ecotropic retroviral transforming sequence	ENSG00000110395	867	Yes	Yes	Yes
CBLB	Cas-Br-M (murine) ecotropic retroviral transforming sequence b	ENSG00000114423	868	Yes	Yes	Yes
CBLC	Cas-Br-M (murine) ecotropic retroviral transforming sequence c	ENSG00000142273	23624	Yes	Yes
EP300	E1A binding protein p300	ENSG00000100393	2033	Yes	Yes	Yes
E2F1	E2F transcription factor 1	ENSG00000101412	1869	Yes	Yes	Yes
E2F2	E2F transcription factor 2	ENSG00000007968	1870	Yes	Yes
E2F3	E2F transcription factor 3	ENSG00000112242	1871	Yes	Yes
FAS	Fas (TNF receptor superfamily member 6)	ENSG00000026103	355
FADD	Fas (TNFRSF6)-associated via death domain	ENSG00000168040	8772	Yes	Yes
FASLG	Fas ligand (TNF superfamily member 6)	ENSG00000117560	356
GLI1	GLI family zinc finger 1	ENSG00000111087	2735	Yes	Yes
GLI2	GLI family zinc finger 2	ENSG00000074047	2736	Yes
GLI3	GLI family zinc finger 3	ENSG00000106571	2737	Yes	Yes
JAK1	Janus kinase 1	ENSG00000162434	3716	Yes	Yes
KITLG	KIT ligand	ENSG00000049130	4254	Yes	Yes	Yes
MAX	MYC associated factor X	ENSG00000125952	4149	Yes	Yes
MDM2	Mdm2 p53 binding protein homolog (mouse)	ENSG00000135679	4193	Yes
NKX3-1	NK3 homeobox 1	ENSG00000167034	4824
PTK2	PTK2 protein tyrosine kinase 2	ENSG00000169398	5747	Yes	Yes
RAD51	RAD51 homolog (RecA homolog E. coli) (S. cerevisiae)	ENSG00000051180	5888	Yes	Yes	Yes
RASSF1	Ras association (RalGDS/AF-6) domain family member 1	ENSG00000068028	11186			Yes
RASSF5	Ras association (RalGDS/AF-6) domain family member 5	ENSG00000136653	83593	Yes	Yes
SKP2	S-phase kinase-associated protein 2 (p45)	ENSG00000145604	6502	Yes	Yes
SMAD2	SMAD family member 2	ENSG00000175387	4087
SMAD3	SMAD family member 3	ENSG00000166949	4088	Yes	Yes	Yes
SMAD4	SMAD family member 4	ENSG00000141646	4089
TRAF1	TNF receptor-associated factor 1	ENSG00000056558	7185	Yes	Yes
TRAF2	TNF receptor-associated factor 2	ENSG00000127191	7186	Yes	Yes
TRAF3	TNF receptor-associated factor 3	ENSG00000131323	7187
TRAF4	TNF receptor-associated factor 4	ENSG00000076604	9618	Yes	Yes
TRAF5	TNF receptor-associated factor 5	ENSG00000082512	7188	Yes
TRAF6	TNF receptor-associated factor 6	ENSG00000175104	7189
TFG	TRK-fused gene	ENSG00000114354	10342	Yes	Yes
XIAP	X-linked inhibitor of apoptosis	ENSG00000101966	331	Yes	Yes	Yes
ACVR1B	activin A receptor type IB	ENSG00000135503	91	Yes	Yes
ACVR1C	activin A receptor type IC	ENSG00000123612	130399
APPL1	adaptor protein phosphotyrosine interaction PH domain and leucine zipper containing 1	ENSG00000157500	26060	Yes	Yes
APC2	adenomatosis polyposis coli 2	ENSG00000115266	10297	Yes
APC	adenomatous polyposis coli	ENSG00000134982	324			Yes
AR	androgen receptor	ENSG00000169083	367
ARNT	aryl hydrocarbon receptor nuclear translocator	ENSG00000143437	405	Yes
ARNT2	aryl-hydrocarbon receptor nuclear translocator 2	ENSG00000172379	9915	Yes
AXIN1	axin 1	ENSG00000103126	8312	Yes	Yes
AXIN2	axin 2	ENSG00000168646	8313	Yes	Yes
BIRC2	baculoviral IAP repeat-containing 2	ENSG00000110330	329	Yes	Yes	Yes
BIRC3	baculoviral IAP repeat-containing 3	ENSG00000023445	330			Yes
BIRC5	baculoviral IAP repeat-containing 5	ENSG00000089685	332	Yes	Yes	Yes
BMP2	bone morphogenetic protein 2	ENSG00000125845	650	Yes
BMP4	bone morphogenetic protein 4	ENSG00000125378	652	Yes	Yes	Yes
BCR	breakpoint cluster region	ENSG00000186716	613	Yes	Yes	Yes
BRCA2	breast cancer 2 early onset	ENSG00000139618	675	Yes	Yes	Yes
ABL1	c-abl oncogene 1 receptor tyrosine kinase	ENSG00000097007	25	Yes	Yes
FIGF	c-fos induced growth factor (vascular endothelial growth factor D)	ENSG00000165197	2277
CDH1	cadherin 1 type 1 E-cadherin (epithelial)	ENSG00000039068	999	Yes	Yes
CASP3	caspase 3 apoptosis-related cysteine peptidase	ENSG00000164305	836			Yes
CASP8	caspase 8 apoptosis-related cysteine peptidase	ENSG00000064012	841	Yes	Yes
CASP9	caspase 9 apoptosis-related cysteine peptidase	ENSG00000132906	842	Yes	Yes
CTNNA1	catenin (cadherin-associated protein) alpha 1 102kDa	ENSG00000044115	1495	Yes	Yes
CTNNA2	catenin (cadherin-associated protein) alpha 2	ENSG00000066032	1496
CTNNA3	catenin (cadherin-associated protein) alpha 3	ENSG00000183230	29119
CTNNB1	catenin (cadherin-associated protein) beta 1 88kDa	ENSG00000168036	1499	Yes	Yes
CDC42, CDC42P2	cell division cycle 42 (GTP binding protein 25kDa); cell division cycle 42 pseudogene 2	ENSG00000070831	643336, 998
CCDC6	coiled-coil domain containing 6	ENSG00000108091	8030	Yes	Yes
COL4A1	collagen type IV alpha 1	ENSG00000187498	1282	Yes	Yes
COL4A2	collagen type IV alpha 2	ENSG00000134871	1284	Yes	Yes	Yes
COL4A4	collagen type IV alpha 4	ENSG00000081052	1286
COL4A6	collagen type IV alpha 6	ENSG00000197565	1288
CSF1R	colony stimulating factor 1 receptor	ENSG00000182578	1436	Yes	Yes
CSF2RA	colony stimulating factor 2 receptor alpha low-affinity (granulocyte-macrophage)	ENSG00000198223	1438
CSF3R	colony stimulating factor 3 receptor (granulocyte)	ENSG00000119535	1441	Yes	Yes
CHUK	conserved helix-loop-helix ubiquitous kinase	ENSG00000213341	1147	Yes
CUL2	cullin 2	ENSG00000108094	8453	Yes	Yes
CCNA1	cyclin A1	ENSG00000133101	8900	Yes	Yes
CCND1	cyclin D1	ENSG00000110092	595	Yes	Yes	Yes
CCNE1	cyclin E1	ENSG00000105173	898	Yes
CCNE2	cyclin E2	ENSG00000175305	9134			Yes
CDK2	cyclin-dependent kinase 2	ENSG00000123374	1017
CDK4	cyclin-dependent kinase 4	ENSG00000135446	1019
CDK6	cyclin-dependent kinase 6	ENSG00000105810	1021	Yes	Yes
CDKN1A	cyclin-dependent kinase inhibitor 1A (p21 Cip1)	ENSG00000124762	1026	Yes	Yes	Yes
CDKN1B	cyclin-dependent kinase inhibitor 1B (p27 Kip1)	ENSG00000111276	1027	Yes	Yes
CDKN2A	cyclin-dependent kinase inhibitor 2A (melanoma p16 inhibits CDK4)	ENSG00000147889	1029	Yes	Yes
CDKN2B	cyclin-dependent kinase inhibitor 2B (p15 inhibits CDK4)	ENSG00000147883	1030
CYCS	cytochrome c somatic	ENSG00000172115	54205
DAPK1	death-associated protein kinase 1	ENSG00000196730	1612
DAPK2	death-associated protein kinase 2	ENSG00000035664	23604	Yes
DAPK3	death-associated protein kinase 3	ENSG00000167657	1613
DCC	deleted in colorectal carcinoma	ENSG00000187323	1630	Yes	Yes
DVL1, DVL1L1	dishevelled dsh homolog 1 (Drosophila); dishevelled dsh homolog 1 (Drosophila)-like 1	ENSG00000107404	1855, 8215	Yes	Yes
DVL2	dishevelled dsh homolog 2 (Drosophila)	ENSG00000004975	1856	Yes
DVL3	dishevelled dsh homolog 3 (Drosophila)	ENSG00000161202	1857	Yes	Yes
MECOM	ecotropic viral integration site 1	ENSG00000085276	2122	Yes	Yes	Yes
EGLN1	egl nine homolog 1 (C. elegans)	ENSG00000135766	54583
EGLN2	egl nine homolog 2 (C. elegans)	ENSG00000171570	112398	Yes	Yes
EGLN3	egl nine homolog 3 (C. elegans)	ENSG00000129521	112399	Yes	Yes
EPAS1	endothelial PAS domain protein 1	ENSG00000116016	2034	Yes	Yes
EGF	epidermal growth factor (beta-urogastrone)	ENSG00000138798	1950
EGFR	epidermal growth factor receptor (erythroblastic leukemia viral (v-erb-b) oncogene homolog avian)	ENSG00000146648	1956	Yes	Yes	Yes
FGF1	fibroblast growth factor 1 (acidic)	ENSG00000113578	2246			Yes
FGF10	fibroblast growth factor 10	ENSG00000070193	2255	Yes	Yes
FGF11	fibroblast growth factor 11	ENSG00000161958	2256	Yes
FGF12	fibroblast growth factor 12	ENSG00000114279	2257	Yes	Yes
FGF13	fibroblast growth factor 13	ENSG00000129682	2258	Yes	Yes
FGF14	fibroblast growth factor 14	ENSG00000102466	2259	Yes	Yes
FGF16	fibroblast growth factor 16	ENSG00000196468	8823
FGF17	fibroblast growth factor 17	ENSG00000158815	8822	Yes
FGF18	fibroblast growth factor 18	ENSG00000156427	8817	Yes
FGF19	fibroblast growth factor 19	ENSG00000162344	9965	Yes
FGF2	fibroblast growth factor 2 (basic)	ENSG00000138685	2247
FGF20	fibroblast growth factor 20	ENSG00000078579	26281
FGF21	fibroblast growth factor 21	ENSG00000105550	26291	Yes	Yes
FGF22	fibroblast growth factor 22	ENSG00000070388	27006	Yes	Yes
FGF23	fibroblast growth factor 23	ENSG00000118972	8074
FGF3	fibroblast growth factor 3 (murine mammary tumor virus integration site (v-int-2) oncogene homolog)	ENSG00000186895	2248	Yes
FGF4	fibroblast growth factor 4	ENSG00000075388	2249	Yes
FGF5	fibroblast growth factor 5	ENSG00000138675	2250	Yes	Yes	Yes
FGF6	fibroblast growth factor 6	ENSG00000111241	2251
FGF8	fibroblast growth factor 8 (androgen-induced)	ENSG00000107831	2253	Yes	Yes
FGF9	fibroblast growth factor 9 (glia-activating factor)	ENSG00000102678	2254
FGFR1	fibroblast growth factor receptor 1	ENSG00000077782	2260	Yes	Yes
FGFR2	fibroblast growth factor receptor 2	ENSG00000066468	2263
FGFR3	fibroblast growth factor receptor 3	ENSG00000068078	2261	Yes
FN1	fibronectin 1	ENSG00000115414	2335	Yes	Yes
FLT3	fms-related tyrosine kinase 3	ENSG00000122025	2322
FLT3LG	fms-related tyrosine kinase 3 ligand	ENSG00000090554	2323	Yes	Yes
FOXO1	forkhead box O1	ENSG00000150907	2308
FZD1	frizzled homolog 1 (Drosophila)	ENSG00000157240	8321	Yes
FZD10	frizzled homolog 10 (Drosophila)	ENSG00000111432	11211
FZD2	frizzled homolog 2 (Drosophila)	ENSG00000180340	2535	Yes	Yes
FZD3	frizzled homolog 3 (Drosophila)	ENSG00000104290	7976			Yes
FZD4	frizzled homolog 4 (Drosophila)	ENSG00000174804	8322
FZD5	frizzled homolog 5 (Drosophila)	ENSG00000163251	7855	Yes	Yes	Yes
FZD6	frizzled homolog 6 (Drosophila)	ENSG00000164930	8323	Yes	Yes
FZD7	frizzled homolog 7 (Drosophila)	ENSG00000155760	8324	Yes
FZD8	frizzled homolog 8 (Drosophila)	ENSG00000177283	8325	Yes	Yes
FZD9	frizzled homolog 9 (Drosophila)	ENSG00000188763	8326	Yes	Yes
FH	fumarate hydratase	ENSG00000091483	2271	Yes	Yes	Yes
GSTP1	glutathione S-transferase pi 1	ENSG00000084207	2950	Yes	Yes
GSK3B	glycogen synthase kinase 3 beta	ENSG00000082701	2932	Yes	Yes	Yes
GRB2	growth factor receptor-bound protein 2	ENSG00000177885	2885	Yes	Yes
HSP90AA1, HSP90AA2	heat shock protein 90kDa alpha (cytosolic) class A member 2; heat shock protein 90kDa alpha (cytosolic) class A member 1	ENSG00000080824	3320, 3324	Yes	Yes
HSP90AB1	heat shock protein 90kDa alpha (cytosolic) class B member 1	ENSG00000096384	3326
HSP90B1	heat shock protein 90kDa beta (Grp94) member 1	ENSG00000166598	7184
HHIP	hedgehog interacting protein	ENSG00000164161	64399	Yes	Yes
HGF	hepatocyte growth factor (hepapoietin A; scatter factor)	ENSG00000019991	3082
HDAC1	histone deacetylase 1	ENSG00000116478	3065	Yes	Yes
HDAC2	histone deacetylase 2	ENSG00000196591	3066	Yes	Yes
RALBP1	hypothetical LOC100129773; ralA binding protein 1	ENSG00000017797	100129773, 10928
FGF7, FGF7P2, LOC100132771	hypothetical LOC100132771; fibroblast growth factor 7 (keratinocyte growth factor); fibroblast growth factor 7 pseudogene 2	ENSG00000140285	100132771, 2252390000
MAPK3	hypothetical LOC100271831; mitogen-activated protein kinase 3	ENSG00000102882	100271831, 5595	Yes	Yes	Yes
HIF1A	hypoxia inducible factor 1 alpha subunit (basic helix-loop-helix transcription factor)	ENSG00000100644	3091	Yes	Yes
IKBKB	inhibitor of kappa light polypeptide gene enhancer in B-cells kinase beta	ENSG00000104365	3551	Yes	Yes
IKBKG	inhibitor of kappa light polypeptide gene enhancer in B-cells kinase gamma	ENSG00000073009	8517	Yes	Yes
IGF1	insulin-like growth factor 1 (somatomedin C)	ENSG00000017427	3479
IGF1R	insulin-like growth factor 1 receptor	ENSG00000140443	3480	Yes	Yes
ITGA2	integrin alpha 2 (CD49B alpha 2 subunit of VLA-2 receptor)	ENSG00000164171	3673	Yes	Yes
ITGA2B	integrin alpha 2b (platelet glycoprotein IIb of IIb/IIIa complex antigen CD41)	ENSG00000005961	3674	Yes	Yes
ITGA3	integrin alpha 3 (antigen CD49C alpha 3 subunit of VLA-3 receptor)	ENSG00000005884	3675	Yes	Yes	Yes
ITGA6	integrin alpha 6	ENSG00000091409	3655	Yes	Yes
ITGAV	integrin alpha V (vitronectin receptor alpha polypeptide antigen CD51)	ENSG00000138448	3685
ITGB1	integrin beta 1 (fibronectin receptor beta polypeptide antigen CD29 includes MDF2 MSK12)	ENSG00000150093	3688	Yes	Yes
IL6	interleukin 6 (interferon beta 2)	ENSG00000136244	3569			Yes
IL8	interleukin 8	ENSG00000169429	3576			Yes
JUN	jun oncogene	ENSG00000177606	3725	Yes	Yes
JUP	junction plakoglobin	ENSG00000173801	3728	Yes	Yes
KLK3	kallikrein-related peptidase 3	ENSG00000142515	354	Yes
LAMA1	laminin alpha 1	ENSG00000101680	284217	Yes		Yes
LAMA2	laminin alpha 2	ENSG00000196569	3908
LAMA3	laminin alpha 3	ENSG00000053747	3909
LAMA4	laminin alpha 4	ENSG00000112769	3910			Yes
LAMA5	laminin alpha 5	ENSG00000130702	3911	Yes	Yes
LAMB1	laminin beta 1	ENSG00000091136	3912	Yes	Yes
LAMB2	laminin beta 2 (laminin S)	ENSG00000172037	3913	Yes	Yes
LAMB3	laminin beta 3	ENSG00000196878	3914	Yes	Yes
LAMB4	laminin beta 4	ENSG00000091128	22798	Yes
LAMC1	laminin gamma 1 (formerly LAMB2)	ENSG00000135862	3915
LAMC2	laminin gamma 2	ENSG00000058085	3918
LAMC3	laminin gamma 3	ENSG00000050555	10319	Yes
LEF1	lymphoid enhancer-binding factor 1	ENSG00000138795	51176	Yes		Yes
MMP1	matrix metallopeptidase 1 (interstitial collagenase)	ENSG00000196611	4312
MMP2	matrix metallopeptidase 2 (gelatinase A 72kDa gelatinase 72kDa type IV collagenase)	ENSG00000087245	4313			Yes
MMP9	matrix metallopeptidase 9 (gelatinase B 92kDa gelatinase 92kDa type IV collagenase)	ENSG00000100985	4318	Yes	Yes
MTOR	mechanistic target of rapamycin (serine/threonine kinase)	ENSG00000198793	2475	Yes
MET	met proto-oncogene (hepatocyte growth factor receptor)	ENSG00000105976	4233	Yes	Yes
MITF	microphthalmia-associated transcription factor	ENSG00000187098	4286			Yes
MAPK1	mitogen-activated protein kinase 1	ENSG00000100030	5594	Yes
MAPK10	mitogen-activated protein kinase 10	ENSG00000109339	5602	Yes	Yes
MAPK8	mitogen-activated protein kinase 8	ENSG00000107643	5599
MAPK9	mitogen-activated protein kinase 9	ENSG00000050748	5601	Yes	Yes
MAP2K1	mitogen-activated protein kinase kinase 1	ENSG00000169032	5604	Yes	Yes	Yes
LOC407835MAP2K2	mitogen-activated protein kinase kinase 2 pseudogene; mitogen-activated protein kinase kinase 2	ENSG00000126934	407835, 5605	Yes	Yes
MLH1	mutL homolog 1 colon cancer nonpolyposis type 2 (E. coli)	ENSG00000076242	4292
MSH2	mutS homolog 2 colon cancer nonpolyposis type 1 (E. coli)	ENSG00000095002	4436	Yes
MSH3	mutS homolog 3 (E. coli)	ENSG00000113318	4437	Yes	Yes
MSH6	mutS homolog 6 (E. coli)	ENSG00000116062	2956	Yes	Yes
NRAS	neuroblastoma RAS viral (v-ras) oncogene homolog	ENSG00000213281	4893			Yes
NTRK1	neurotrophic tyrosine kinase receptor type 1	ENSG00000198400	4914	Yes	Yes
NOS2	nitric oxide synthase 2 inducible	ENSG00000007171	4843
NFKB1	nuclear factor of kappa light polypeptide gene enhancer in B-cells 1	ENSG00000109320	4790	Yes	Yes
NFKB2	nuclear factor of kappa light polypeptide gene enhancer in B-cells 2 (p49/p100)	ENSG00000077150	4791	Yes	Yes	Yes
NFKBIA	nuclear factor of kappa light polypeptide gene enhancer in B-cells inhibitor alpha	ENSG00000100906	4792			Yes
NCOA4	nuclear receptor coactivator 4	ENSG00000138293	8031	Yes	Yes
PAX8	paired box 8	ENSG00000125618	7849	Yes	Yes	Yes
PTCH1	patched homolog 1 (Drosophila)	ENSG00000185920	5727	Yes	Yes	Yes
PTCH2	patched homolog 2 (Drosophila)	ENSG00000117425	8643	Yes	Yes
PPARD	peroxisome proliferator-activated receptor delta	ENSG00000112033	5467
PPARG	peroxisome proliferator-activated receptor gamma	ENSG00000132170	5468	Yes	Yes
PTEN, PTENP1	phosphatase and tensin homolog; phosphatase and tensin homolog pseudogene 1	ENSG00000171862	11191, 5728			Yes
PIK3CA	phosphoinositide-3-kinase catalytic alpha polypeptide	ENSG00000121879	5290
PIK3CB	phosphoinositide-3-kinase catalytic beta polypeptide	ENSG00000051382	5291	Yes	Yes
PIK3CD	phosphoinositide-3-kinase catalytic delta polypeptide	ENSG00000171608	5293	Yes	Yes
PIK3CG	phosphoinositide-3-kinase catalytic gamma polypeptide	ENSG00000105851	5294
PIK3R1	phosphoinositide-3-kinase regulatory subunit 1 (alpha)	ENSG00000145675	5295
PIK3R2	phosphoinositide-3-kinase regulatory subunit 2 (beta)	ENSG00000105647	5296	Yes	Yes
PIK3R3	phosphoinositide-3-kinase regulatory subunit 3 (gamma)	ENSG00000117461	8503	Yes	Yes	Yes
PIK3R5	phosphoinositide-3-kinase regulatory subunit 5	ENSG00000141506	23533
PLCG1	phospholipase C gamma 1	ENSG00000124181	5335	Yes	Yes
PLCG2	phospholipase C gamma 2 (phosphatidylinositol-specific)	ENSG00000197943	5336	Yes	Yes
PLD1	phospholipase D1 phosphatidylcholine-specific	ENSG00000075651	5337	Yes	Yes
PGF	placental growth factor	ENSG00000119630	5228	Yes	Yes
PDGFA	platelet-derived growth factor alpha polypeptide	ENSG00000197461	5154	Yes	Yes
PDGFB	platelet-derived growth factor beta polypeptide (simian sarcoma viral (v-sis) oncogene homolog)	ENSG00000100311	5155	Yes	Yes
PDGFRA	platelet-derived growth factor receptor alpha polypeptide	ENSG00000134853	5156	Yes	Yes	Yes
PDGFRB	platelet-derived growth factor receptor beta polypeptide	ENSG00000113721	5159	Yes	Yes	Yes
LOC652346PML	promyelocytic leukemia; similar to promyelocytic leukemia protein isoform 1	ENSG00000140464	5371, 652346	Yes	Yes
PTGS2	prostaglandin-endoperoxide synthase 2 (prostaglandin G/H synthase and cyclooxygenase)	ENSG00000073756	5743
PIAS1	protein inhibitor of activated STAT 1	ENSG00000033800	8554	Yes	Yes
PIAS2	protein inhibitor of activated STAT 2	ENSG00000078043	9063	Yes
PIAS3	protein inhibitor of activated STAT 3	ENSG00000131788	10401	Yes	Yes	Yes
PIAS4	protein inhibitor of activated STAT 4	ENSG00000105229	51588
PRKCA	protein kinase C alpha	ENSG00000154229	5578	Yes	Yes	Yes
PRKCB	protein kinase C beta	ENSG00000166501	5579	Yes
PRKCG	protein kinase C gamma	ENSG00000126583	5582	Yes	Yes
RALGDS	ral guanine nucleotide dissociation stimulator	ENSG00000160271	5900	Yes
RHOA	ras homolog gene family member A	ENSG00000067560	387	Yes
RAC1	ras-related C3 botulinum toxin substrate 1 (rho family small GTP binding protein Rac1)	ENSG00000136238	5879	Yes
RAC2	ras-related C3 botulinum toxin substrate 2 (rho family small GTP binding protein Rac2)	ENSG00000128340	5880	Yes
RAC3	ras-related C3 botulinum toxin substrate 3 (rho family small GTP binding protein Rac3)	ENSG00000169750	5881	Yes	Yes
RET	ret proto-oncogene	ENSG00000165731	5979	Yes	Yes
RB1	retinoblastoma 1	ENSG00000139687	5925
RARA	retinoic acid receptor alpha	ENSG00000131759	5914	Yes	Yes	Yes
RARB	retinoic acid receptor beta	ENSG00000077092	5915			Yes
RXRA	retinoid X receptor alpha	ENSG00000186350	6256	Yes	Yes	Yes
RXRB	retinoid X receptor beta	ENSG00000204231ENSG00000206218ENSG00000206289	6257
RXRG	retinoid X receptor gamma	ENSG00000143171	6258
RBX1	ring-box 1	ENSG00000100387	9978	Yes	Yes	Yes
RUNX1	runt-related transcription factor 1	ENSG00000159216	861	Yes	Yes
RUNX1T1	runt-related transcription factor 1; translocated to 1 (cyclin D-related)	ENSG00000079102	862	Yes	Yes
STK36	serine/threonine kinase 36 fused homolog (Drosophila)	ENSG00000163482	27148
STK4	serine/threonine kinase 4	ENSG00000101109	6789			Yes
STAT1	signal transducer and activator of transcription 1 91kDa	ENSG00000115415	6772	Yes	Yes
STAT3	signal transducer and activator of transcription 3 (acute-phase response factor)	ENSG00000168610	6774			Yes
STAT5A	signal transducer and activator of transcription 5A	ENSG00000126561	6776
STAT5B	signal transducer and activator of transcription 5B	ENSG00000173757	6777
KITLOC652799, LOC653882	similar to Mast/stem cell growth factor receptor precursor (SCFR) (Proto-oncogene tyrosine-protein kinase Kit) (c-kit) (CD117 antigen); v-kit Hardy-Zuckerman 4 feline sarcoma viral oncogene homolog	ENSG00000157404	3815, 652799, 653880	Yes	Yes
TCEB1	similar to elongin C; transcription elongation factor B (SIII) polypeptide 1 (15kDa elongin C)	ENSG00000154582	100132973, 6921	Yes	Yes
LOC652671	similar to promyelocytic leukemia protein isoform 9		652671
SMO	smoothened homolog (Drosophila)	ENSG00000128602	6608	Yes
SLC2A1	solute carrier family 2 (facilitated glucose transporter) member 1	ENSG00000117394	6513	Yes	Yes
SOS1	son of sevenless homolog 1 (Drosophila)	ENSG00000115904	6654	Yes	Yes	Yes
SOS2	son of sevenless homolog 2 (Drosophila)	ENSG00000100485	6655	Yes	Yes
SHH	sonic hedgehog homolog (Drosophila)	ENSG00000164690	6469	Yes
SPI1	spleen focus forming virus (SFFV) proviral integration oncogene spi1	ENSG00000066336	6688	Yes
SUFU	suppressor of fused homolog (Drosophila)	ENSG00000107882	51684
TCEB2	transcription elongation factor B (SIII) polypeptide 2 (18kDa elongin B)	ENSG00000103363	6923	Yes	Yes
TCF7	transcription factor 7 (T-cell specific HMG-box)	ENSG00000081059	6932	Yes	Yes
TCF7L1	transcription factor 7-like 1 (T-cell specific HMG-box)	ENSG00000152284	83439	Yes	Yes	Yes
TCF7L2	transcription factor 7-like 2 (T-cell specific HMG-box)	ENSG00000148737	6934	Yes	Yes
TGFA	transforming growth factor alpha	ENSG00000163235	7039
TGFB1	transforming growth factor beta 1	ENSG00000105329	7040	Yes
TGFB2	transforming growth factor beta 2	ENSG00000092969	7042	Yes	Yes	Yes
TGFB3	transforming growth factor beta 3	ENSG00000119699	7043	Yes	Yes	Yes
TGFBR1	transforming growth factor beta receptor 1	ENSG00000106799	7046
TGFBR2	transforming growth factor beta receptor II (70/80kDa)	ENSG00000163513	7048	Yes	Yes
TPR	translocated promoter region (to activated MET oncogene)	ENSG00000047410	7175
TPM3	tropomyosin 3	ENSG00000143549	7170	Yes	Yes
TP53	tumor protein p53	ENSG00000141510	7157	Yes
HRAS	v-Ha-ras Harvey rat sarcoma viral oncogene homolog	ENSG00000174775	3265	Yes	Yes
KRAS	v-Ki-ras2 Kirsten rat sarcoma viral oncogene homolog	ENSG00000133703	3845
AKT1	v-akt murine thymoma viral oncogene homolog 1	ENSG00000142208	207	Yes	Yes
AKT2	v-akt murine thymoma viral oncogene homolog 2	ENSG00000105221	208	Yes
AKT3	v-akt murine thymoma viral oncogene homolog 3 (protein kinase B gamma)	ENSG00000117020	10000	Yes	Yes	Yes
CRK	v-crk sarcoma virus CT10 oncogene homolog (avian)	ENSG00000167193	1398	Yes	Yes
CRKL	v-crk sarcoma virus CT10 oncogene homolog (avian)-like	ENSG00000099942	1399	Yes	Yes
ERBB2	v-erb-b2 erythroblastic leukemia viral oncogene homolog 2 neuro/glioblastoma derived oncogene homolog (avian)	ENSG00000141736	2064	Yes	Yes
ETS1	v-ets erythroblastosis virus E26 oncogene homolog 1 (avian)	ENSG00000134954	2113	Yes	Yes
FOS	v-fos FBJ murine osteosarcoma viral oncogene homolog	ENSG00000170345	2353	Yes	Yes
MYC	v-myc myelocytomatosis viral oncogene homolog (avian)	ENSG00000136997	4609	Yes
ARAF	v-raf murine sarcoma 3611 viral oncogene homolog	ENSG00000078061	369			Yes
BRAF	v-raf murine sarcoma viral oncogene homolog B1	ENSG00000157764	673
RAF1	v-raf-1 murine leukemia viral oncogene homolog 1	ENSG00000132155	5894	Yes	Yes
RALA	v-ral simian leukemia viral oncogene homolog A (ras related)	ENSG00000006451	5898	Yes
RALB	v-ral simian leukemia viral oncogene homolog B (ras related; GTP binding protein)	ENSG00000144118	5899	Yes	Yes	Yes
RELA	v-rel reticuloendotheliosis viral oncogene homolog A (avian)	ENSG00000173039	5970	Yes	Yes
VEGFA	vascular endothelial growth factor A	ENSG00000112715	7422	Yes	Yes
VEGFB	vascular endothelial growth factor B	ENSG00000173511	7423	Yes	Yes
VEGFC	vascular endothelial growth factor C	ENSG00000150630	7424			Yes
VHL	von Hippel-Lindau tumor suppressor	ENSG00000134086	7428	Yes	Yes
WNT2	wingless-type MMTV integration site family member 2	ENSG00000105989	7472	Yes
WNT1	wingless-type MMTV integration site family member 1	ENSG00000125084	7471	Yes	Yes
WNT10A	wingless-type MMTV integration site family member 10A	ENSG00000135925	80326	Yes	Yes
WNT10B	wingless-type MMTV integration site family member 10B	ENSG00000169884	7480	Yes	Yes
WNT11	wingless-type MMTV integration site family member 11	ENSG00000085741	7481	Yes
WNT16	wingless-type MMTV integration site family member 16	ENSG00000002745	51384
WNT2B	wingless-type MMTV integration site family member 2B	ENSG00000134245	7482	Yes	Yes	Yes
WNT3	wingless-type MMTV integration site family member 3	ENSG00000108379	7473	Yes	Yes
WNT3A	wingless-type MMTV integration site family member 3A	ENSG00000154342	89780	Yes
WNT4	wingless-type MMTV integration site family member 4	ENSG00000162552	54361
WNT5A	wingless-type MMTV integration site family member 5A	ENSG00000114251	7474	Yes	Yes	Yes
WNT5B	wingless-type MMTV integration site family member 5B	ENSG00000111186	81029
WNT6	wingless-type MMTV integration site family member 6	ENSG00000115596	7475	Yes
WNT7A	wingless-type MMTV integration site family member 7A	ENSG00000154764	7476	Yes	Yes
WNT7B	wingless-type MMTV integration site family member 7B	ENSG00000188064	7477	Yes		Yes
WNT8A	wingless-type MMTV integration site family member 8A	ENSG00000061492	7478
WNT8B	wingless-type MMTV integration site family member 8B	ENSG00000075290	7479
WNT9A	wingless-type MMTV integration site family member 9A	ENSG00000143816	7483	Yes
WNT9B	wingless-type MMTV integration site family member 9B	ENSG00000158955	7484	Yes	Yes
ZBTB16	zinc finger and BTB domain containing 16	ENSG00000109906	7704	Yes
Sum				231	182	70
* AbGs-5kb: Genes with Ago1 peaks within 5 kb distance up- and downstream of their TSS.
* AbGs-1kb†: Genes with Ago1 peaks within 1 kb distance up- and downstream of their TSS.
# ArG: Ago1-regulated genes whose expression is changed by >absolute 1.2 fold following Ago1 knockdown.
